# Supplementary material for: Predicting differential ion mobility behaviour in silico using machine learning
Source: Royal Society of Chemistry journal article supplement (doi:10.1039/d1an00557j), 2021-01-01
Supplement: d1an00557j2.xlsx [file d1an00557j2.xlsx]

## Sheet: Mass, DMS Data, and CCS
Compound	m/z	SV 1500	SV 2000	SV 2500	SV 3000	SV 3250	SV 3500	SV 3750	SV 4000	Boltzmann-weighted CCS
5-Cl-MQOH	194.04	0.1	0.1	0.3	0.5	0.90875	1.6	2.56625	3.8	138.66
5-CN-MQOH	185.07	0.1	0.1	-0.2	-0.3	-0.145	0.2	0.77	1.6	132.21
5-F-MQOH	178.07	-0.2	-0.4	-0.5	-0.3	0.0766667	0.7	1.59833	2.8	127.47
5-Me-MQOH	174.09	-0.2	-0.2	0	0.8	1.47458	2.4	3.65042	5.3	129.45
5-NO2-MQOH	205.06	0.2	-0.1	0	-0.4	-0.34	0	0.59	1.4	137.66
5-OMe-MQOH	190.09	-0.1	-0.1	0.2	1.1	1.82417	2.8	4.10083	5.8	131.334
6-amino-2-MQ	159.1	0	-0.1	0.2	1.2	2.03792	3.2	4.78708	6.9	126.43
6-Cl-MQOH	194.04	0.1	-0.1	-0.3	0.1	0.575417	1.3	2.34958	3.8	139.83
6-CN-MQOH	185.07	0.1	0	-0.8	-1.3	-1.23458	-0.9	-0.265417	0.7	132.72
6-F-MQOH	178.07	0	-0.3	-0.8	-0.5	-0.02875	0.7	1.75375	3.2	129.26
6-Me-MQOH	174.09	-0.2	-0.2	0.1	1	1.80875	2.9	4.29125	6	129.62
6-methoxy-2-MQ	174.1	0.3	0.4	0.8	2.1	3.19167	4.6	6.33333	8.4	128.595
6-methyl-2-MQ	158.1	0.2	0.2	0.6	1.9	3.02667	4.5	6.32333	8.5	126.14
6-nitro-2-MQ	189.1	0.6	0	-0.8	-0.6	-0.164583	0.5	1.43958	2.7	138.15
6-NO2-MQOH	205.06	0.2	-0.1	-0.3	-1.2	-1.2875	-1	-0.3875	0.5	139.37
6-OMe-MQOH	190.09	-0.1	-0.1	0.2	1.2	1.97667	3	4.34833	6.1	132.904
7-aminoclonazepam	286.1	0.43	0.8	1.78	3.06	3.91575	5.04	6.54175	8.53	162.906
7-chloro-2-MQ	178.1	0.4	0.3	0.1	0.9	1.75042	2.9	4.34958	6.1	129.57
7-Cl-MQOH	194.04	0	0	0.1	0.7	1.36625	2.3	3.48375	4.9	136.88
7-CN-MQOH	185.07	0.2	0.1	-0.5	-0.4	-0.100833	0.4	1.17583	2.3	130.92
7-F-MQOH	178.07	-0.2	-0.4	-0.4	0	0.55875	1.4	2.51625	3.9	128.01
7-Me-MQOH	174.09	-0.1	-0.1	0.2	0.9	1.59458	2.6	3.95542	5.7	128.85
7-NO2-MQOH	205.06	0	-0.3	-0.7	-0.65	-0.390625	0.1	0.903125	2.1	135.95
7-OMe-MQOH	190.09	-0.1	0	0.3	1.4	2.18958	3.2	4.53542	6.3	131.9
8-amino-2-MQ	159.1	0.2	0.1	0.1	1.2	2.10375	3.3	4.89625	7	124.07
8-chloro-2-MQ	178.1	0.1	0.2	0.6	1.7	2.69125	4	5.60875	7.5	127.88
8-methoxy-2-MQ	174.1	0.2	0.5	1.2	2.6	3.78083	5.3	7.11917	9.2	128.2
8-methyl-2-MQ	158.1	0.1	0.2	0.7	1.9	3.01625	4.5	6.30875	8.4	127.66
8-nitro-2-MQ	189.1	-0.1	-0.2	-0.2	0.5	1.29208	2.4	3.80792	5.5	130.62
A1a	262.09	0.7	1.2	2	3.3	4.07542	5	6.17458	7.7	160.242
A1b	262.09	0.8	1.4	2.3	3.7	4.53458	5.5	6.66542	8.1	158.213
A2a	259.1	0.7	1.3	2.3	3.8	4.75042	5.9	7.32458	9.1	163.229
A2b	259.1	1	1.3	2.3	3.7	4.64125	5.8	7.20875	8.9	166.649
A3a	258.1	1	1.5	2.5	4	4.84375	5.8	6.95625	8.4	155.42
A3b	258.1	1	1.7	2.9	4.4	5.31875	6.4	7.68125	9.2	162.114
A4a	286.1	0.4	0.8	1.4	2.3	2.99542	3.9	5.02958	6.4	175.745
A4b	286.1	0.6	1	1.7	2.4	2.70292	3.1	3.74708	4.8	178.953
A4c	286.1	0.5	0.8	1.3	1.8	2.2925	3	3.9075	5	178.693
A5a	364	0.8	1.3	2.2	3.4	4.12458	5	6.10042	7.5	177.505
A5b	364	0.8	1.3	2.2	3.4	4.09833	4.9	5.85167	7	180.885
A6a	348.1	0.7	1.2	2.1	3.4	4.2125	5.2	6.4375	8	175.361
A6b	348.1	0.8	1.3	2.1	3.2	3.75958	4.4	5.24042	6.4	178.656
B2a	277.16	0.7	1.3	2.5	4.2	5.325	6.7	8.375	10.4	163.174
B2b	277.16	0.9	1.5	2.4	3.4	4.03708	4.9	6.11292	7.8	169.025
B3a	335.1	0.8	1.4	2.5	4.3	5.44958	6.8	8.40042	10.3	171.452
B3b	335.1	0.8	1.5	2.5	4	4.83083	5.8	7.04417	8.7	184.489
B4a	381.1	0.8	1.3	2.2	3.5	4.40167	5.5	6.79833	8.3	191.673
B4b	381.1	0.9	1.7	2.8	4.4	5.37917	6.5	7.79583	9.3	183.765
C1a	403.13	0.3	0.8	1.2	1.3	1.74167	2.5	3.48333	4.6	189.092
C1b	403.13	0.6	1.1	1.8	2	2.22708	2.7	3.49792	4.7	184.983
C2a	326.16	0.2	0.2	0.2	0.1	0.304583	0.7	1.22042	1.8	170.039
C2b	326.16	0.3	0.4	0.4	0.4	0.808333	1.5	2.36667	3.3	172.786
C3a	429.15	0.4	0.9	1.7	2.6	3.30708	4.3	5.64292	7.4	206.318
C3b	429.15	0.4	0.6	1	1.7	2.37083	3.3	4.47917	5.9	201.176
C4a	429.15	0.4	0.8	1.4	2.3	2.99542	3.9	5.02958	6.4	196.354
C4b	429.15	0.6	1	1.7	2.4	2.70292	3.1	3.74708	4.8	198.585
C5a	410.19	0.7	1.3	2.2	3.7	4.61792	5.7	7.03208	8.7	215.773
C5b	410.19	0.9	1.1	1.9	3	3.71375	4.6	5.71125	7.1	216.657
CRG1a	162.1	0.4	1	2	3.5	4.9925	6.6	7.7075	7.7	129.081
CRG1b	149.1	-0.3	-1.1	-1.5	-1.1	-0.479583	0.5	1.90458	3.8	123.988
CRG1d	178.1	0.7	1.1	2.1	3.8	4.60833	6	8.79167	13.8	135.22
CRG1g	178.1	0.7	1.1	2.2	3.9	4.90667	6.5	9.26833	13.8	133.977
CRG2a	86.06	-0.2	-0.1	0.4	1.9	2.33458	3	4.64042	8	110.757
CRG2b	162.1	0.5	1	1.7	3.2	3.76667	4.4	5.48333	7.4	131.796
CRG2c	142.1	0.3	0.7	1.6	3.5	4.61	5.8	7.115	8.6	121.788
CRG2d	140.1	0.6	0.9	1.9	4.4	5.53125	6.7	8.26875	10.6	121.903
CRG3a	98.06	0	0.4	1.4	3.2	5.83917	8.8	10.6608	10	111.852
CRG3b	162.1	0.7	1	2.2	4	5.80042	8	10.1496	11.8	131.539
CRG3e	114.1	0.3	0.7	1.8	3.8	5.40708	7.2	8.84292	10	116.18
CRG3f	126.1	0.1	0.7	1.5	3.2	4.46583	6	7.78417	9.8	118.2
CRG3g	100.1	0.1	0.5	1.4	3.4	5.14208	7.1	8.85792	10	113.244
CRG3i	112.1	0.3	0.6	1.5	2.7	4.35083	6.4	8.19917	9.1	115.564
CRG4a	130.1	0.1	0.5	1.5	3.4	4.79417	6.2	7.25583	7.6	122.232
CRG4b	116.1	0.3	0.9	1.7	3.8	5.28833	7.1	9.31167	12	116.071
MQOH	160.08	-0.4	-0.6	-0.7	-0.4	0.0554167	0.8	1.89458	3.4	125.75
3-Hydroxycarbofuran	238.108	0.425219	1.11155	2.00282	3.40104	4.52562	6.21037	7.68347	9.94097	147.55
Acibenzolar-S-methyl	211	0.403346	0.791137	1.3001	2.24958	2.99796	3.91065	4.96486	6.3284	134.84
Aldicarb sulfone	223.075	-0.234361	0.698967	2.41034	4.13792	5.0818	7.1115	8.87986	10.8259	140
Ametryn	228.13	0.437807	1.149	2.37527	4.04282	5.06674	6.36824	7.66974	9.28794	151.92
Aminocarb	209.129	0.271162	0.495364	0.788593	1.62259	2.35974	3.21183	4.45885	6.0258	148.55
Amitraz	294.201	0.432646	1.14348	2.3703	4.10437	5.21703	6.66676	8.11649	9.83666	177.58
Azoxystrobin	404.125	0.661558	1.65268	3.13801	5.46455	7.02959	8.77278	10.778	13.0264	203.238
Benalaxyl	326.177	0.113426	0.694376	1.54396	3.05287	4.28976	6.0511	7.60158	9.40292	170.293
Benzoximate	364.075	0.438256	1.07988	1.87327	3.88808	5.37439	6.19214	7.83091	9.65155	183.708
Bifenazate	301.156	0.276955	0.76658	1.51467	2.72064	3.57938	4.6208	5.66223	7.02078	175.7
Bitertanol	338.187	-0.0139454	0.799836	2.48032	4.60727	5.7593	7.20897	8.65864	10.4635	191.72
Boscalid	343.04	0.414806	0.89416	1.71228	2.95741	3.76443	4.71766	5.88876	7.21198	175.16
Bupirimate	317.166	0.125683	0.872203	2.2203	4.12939	5.34253	6.92345	8.50436	10.3096	178.73
Buprofezin	306.169	0.380436	1.14795	2.31346	4.00938	5.06096	6.17336	7.59212	9.06677	172.88
Butafenacil	475.088	0.252895	0.937	2.45286	4.57286	5.78213	7.16961	8.71041	10.3693	205.65
Butoxycarboxim	223.075	0.00433072	0.329	1.11648	2.74323	3.83298	4.74393	6.38789	8.32811	141.54
Carbendazim	192.077	0.302401	0.904815	2.0202	3.73557	4.92329	6.5833	8.35956	10.3348	135.72
Carbetamide	237.124	0.259299	0.671706	1.40253	2.78769	3.79501	4.92105	6.41571	8.21877	155.76
Carbofuran	222.113	0.484967	1.33946	2.78769	4.896	6.21313	7.72207	9.45055	11.3922	142.47
Carboxin	236.075	0.44927	1.04085	2.17345	3.58726	4.38844	5.51834	6.64824	7.99906	145.35
Carfentrazone-ethyl	412.044	0.27616	0.700139	1.396	2.56293	3.3334	4.00667	4.67994	5.96556	177.99
Chlorfluazuron	539.97	0.253148	0.541827	0.983962	1.98411	2.82647	3.892	5.21857	6.85465	221.18
Chloroxuron	291.091	0.778797	1.58644	2.86933	4.79597	6.07356	7.61196	9.27163	11.1361	174.19
Chlortoluron	213.08	0.196371	0.650146	1.38443	2.72559	3.66261	4.64215	6.12774	7.64379	144.78
Clethodim	360.141	-0.166726	-0.172156	0.0458703	0.525968	0.93155	1.62528	2.38435	3.48075	193.51
Clofentezine	303.02	0.393795	1.04191	2.05885	3.4998	4.42423	5.63414	7.17022	8.7388	157.81
Clothianidin	250.016	0.286891	0.65123	1.27086	2.56427	3.54747	4.62315	6.08103	7.67078	151.57
Cyazofamid	325.052	0.365212	0.81291	1.54977	2.66755	3.40284	4.30372	5.44796	6.82702	166.91
Cycluron	199.181	0.42307	1.00319	2.00476	3.66813	4.82012	6.20667	7.92559	9.86597	143.91
Cyproconazole	292.121	0.435661	1.12213	2.38544	4.45123	5.85657	7.46725	9.12942	11.391	166.83
Cyprodinil	226.139	0.448912	0.951403	1.92998	3.50228	4.67666	6.42171	7.918	9.7137	151.36
Desmedipham	301.119	0.26585	0.865749	2.04969	3.5642	4.48214	5.86658	7.11319	8.9766	170.25
Diclobutrazol	328.099	0.077959	0.75	1.97015	3.55	4.59969	6.31339	7.63365	9.33995	170.68
Dicrotophos	238.084	0.402354	0.822101	1.50595	2.48588	3.11249	3.89348	4.7991	5.92393	149.58
Diethofencarb	268.155	-1.0205	-0.403788	1.70157	3.41658	3.81483	5.15527	6.49572	7.99566	169.28
Difenoconazole	406.073	-0.000138418	0.25	0.852125	2.12542	2.99397	3.81028	5.50903	7.54865	201.15
Diflubenzuron	311.04	0.495989	1.14112	2.19989	3.62223	4.49934	5.6234	6.74747	8.17856	160.64
Dimethoate	230.007	0.479246	1.3177	2.71306	4.7976	6.17799	7.87569	9.57339	11.4937	140.98
Dimethomorph	388.133	0.375228	0.861546	1.6832	2.93307	3.77526	4.85529	6.05978	7.44107	193.58
Dimoxystrobin	327.171	0.176899	0.72674	1.92572	3.69776	4.95271	6.95841	8.73531	11.03	179.21
Diniconazole	326.083	0.206346	0.518022	1.074	2.14439	2.95511	3.96814	5.30497	6.84353	171.73
Dioxacarb	224.092	0.504027	0.985074	1.73862	2.93156	3.7147	4.54278	5.56605	6.67657	141.93
Diuron	233.025	0.291391	0.677843	1.30345	2.2104	2.81545	3.62291	4.52826	5.79019	146.54
Epoxiconazole	330.082	0.551895	1.01786	1.68315	2.91105	3.77365	4.55335	5.58148	6.73745	175.2
Etaconazole	328.062	0.399822	0.868382	1.60083	2.78885	3.58667	4.48581	5.74	7.0211	171.72
Ethiprole	396.991	0.267135	0.966155	2.17454	3.66282	4.48357	5.52459	6.56562	7.78757	180.91
Ethirimol	210.161	0.624219	1.0735	1.39232	2.37056	3.34975	4.48435	5.61896	6.442	149.92
Ethofumesate	287.095	0.451719	0.987124	1.92418	3.45843	4.4242	5.39734	7.1483	9.40351	169.63
Etoxazole	360.185	0.56538	1.38348	2.72021	4.81749	6.24317	7.91213	9.58109	11.5586	185.73
Famoxadon	375.133	0.591942	1.2481	2.34919	4.06284	5.22157	6.63132	8.04106	9.03186	196.73
Fenamidone	312.118	0.436408	1.03526	2.04036	3.56361	4.57141	5.81575	7.25042	8.83883	171.35
Fenarimol	331.041	0.423976	0.919493	1.68941	2.57769	3.08138	3.83008	4.58804	5.8009	174.42
Fenazaquin	307.184	0.998065	2.24323	4.24478	7.28353	9.24892	11.4278	13.9215	16.6768	165.29
Fenbuconazole	337.123	2.6861	3.6953	3.78625	4.71368	5.87168	6.5316	7.19152	8.75697	178.78
Fenhexamid	302.071	0.595815	1.23154	2.25176	3.78979	4.78931	5.97249	7.46236	9.03804	160.33
Fenobucarb	208.134	0.0887437	0.69574	1.57187	2.85957	3.77991	5.06496	6.35001	8.18033	145.57
Fenoxycarb	302.14	0.174688	0.727056	1.65339	3.06796	3.97564	5.02445	6.44234	7.96551	179.4
Fenpropimorph	304.264	0.620458	1.539	3.08242	5.52467	7.17156	9.04669	10.9218	13.1912	176
Fenpyroximate	422.209	0.551774	1.30514	2.53894	4.20841	5.23708	6.53365	7.83021	9.28188	200.82
Fenuron	165.103	-0.934674	-0.492294	1.20113	3.60343	4.85277	6.12609	7.39942	8.92509	131.6
Fipronil	436.946	-0.934674	-0.492294	1.20113	3.60343	4.85277	6.12609	7.39942	8.92509	179.44
Flonicamid	230.054	-0.398383	-0.0211639	0.772342	0.717819	0.309974	0.906852	1.50373	2.25164	146.74
Flufenacet	364.075	0.470609	1.28376	2.37188	4.30872	5.67482	6.92988	8.48231	10.4153	173.62
Flufenoxuron	489.045	0.436244	1.07038	2.19154	3.68584	4.61319	5.90759	7.20199	8.79961	207.59
Fluoxastrobin	459.092	0.546333	1.22429	2.27468	3.82754	4.8598	6.10415	7.34849	8.8961	212.64
Fluquinconazole	376.017	1.7566	2.35219	2.35804	3.02883	3.85879	4.2535	4.64821	5.78907	173.6
Flusilazole	316.109	0.472432	0.990504	1.86376	3.23354	4.15467	5.2408	6.42144	7.85314	172.74
Flutolanil	324.125	0.503718	1.26166	2.54416	4.49009	5.76008	7.24599	8.89233	10.8203	169.04
Flutriafol	302.112	0.302301	0.664501	1.25482	2.2746	3.00374	3.86086	4.91851	6.34122	165.52
Forchlorfenuron	248.059	0.340788	0.701647	1.31994	2.41569	3.20866	4.16644	5.36184	6.82539	153.43
Fuberidazole	185.071	0.285971	0.25	-0.0233082	0.3152	0.985826	1.90127	3.12228	4.75526	132.88
Furalaxyl	302.143	0.574893	1.36582	2.6737	4.8367	6.32311	8.01326	9.99799	12.2271	163.24
Furathiocarb	383.169	0.582164	1.50767	2.93108	5.07386	6.46958	8.0415	9.86475	11.8803	192.59
Hexaconazole	314.083	0.378143	0.83062	1.59022	2.78489	3.58977	4.55144	5.66024	6.9961	171.85
Hexaflumuron	460.989	-0.15588	0.525392	1.99094	3.67951	4.53548	5.82873	7.12198	8.66211	193.9
Hexythiazox	353.112	0.295711	0.954463	2.11728	3.79131	4.81952	6.01098	7.40244	8.92661	180.03
Hydramethylnon	495.199	0.432606	0.941918	1.76563	3.02363	3.84055	4.75586	5.83331	7.06381	235.73
Imidacloprid	256.061	0.46308	0.831229	1.05568	1.4822	1.97847	2.8255	3.54095	4.78032	150.1
Indoxacarb	528.078	0.602985	1.33384	2.5426	4.46607	5.70961	6.96477	8.48577	10.3169	210.52
Ipconazole	334.169	0.599717	1.38085	2.72491	4.75391	6.07648	7.67505	9.5121	11.5969	167.66
Iprovalicarb	321.218	0.501015	1.29515	2.57138	4.45775	5.70983	7.27718	8.93044	10.785	184.97
Isoprocarb	194.118	-0.102782	0.186558	1.15727	2.31909	2.84908	3.74405	5.42567	7.51074	140.4
Isoproturon	207.15	0.223115	0.58044	1.22785	2.39036	3.24892	4.38667	5.91415	7.59722	150.35
Kresoxim-methyl	314.139	-0.635902	0.111767	2.30195	4.92196	6.14903	7.7445	9.33996	11.56	175.13
Linuron	249.02	0.161615	0.48723	0.941953	2.16277	3.21765	4.29513	5.37262	6.98571	148.44
Lufenuron	510.986	-0.382752	0.323424	1.9994	3.79383	4.6099	5.98196	7.35401	8.86683	193.43
Mandipropamid	412.136	0.694216	1.60011	2.98544	5.13757	6.61556	8.36352	10.1115	12.1853	196.28
Mefenacet	299.087	0.368501	1.05871	2.14997	3.96135	5.19548	6.51612	8.12331	10.0104	166.42
Mepanipyrim	224.123	0.388216	0.9215	1.91269	3.65191	4.8997	6.41482	8.15115	10.2387	150.85
Mepronil	270.151	0.415026	1.08926	2.21666	3.85966	4.94165	6.34325	7.83618	9.58273	167.68
Mesotrione	340.049	0.460156	0.87958	1.38167	2.5364	3.39145	3.92996	4.78773	6.03644	176.08
Metaflumizone	507.126	0.564782	1.19323	2.27252	3.76231	4.69999	5.91996	7.13993	8.73991	213.05
Metalaxyl	280.157	0.429395	1.15242	2.42997	4.30525	5.5335	7.14643	8.92453	10.9428	155.72
Metconazole	320.153	0.519559	1.37056	3.04562	5.39229	6.78352	8.4579	10.3931	12.6765	172.14
Methabenzthiazuron	222.07	0.332111	0.659871	1.15001	2.2484	3.1655	4.30581	5.73161	7.37807	139.7
Methamidophos	142.009	-0.926209	-2.09803	-3.66564	-5.04895	-5.47193	-5.63011	-5.2787	-4.53126	116.66
Methiocarb	226.108	-0.15012	0.218755	1.10837	2.02111	2.34634	2.88268	4.09263	5.96577	149.45
Methoprotryne	272.154	0.566086	1.28107	2.5161	4.40954	5.65659	7.14525	8.8151	10.8123	159.68
Methoxyfenozide	369.218	0.491422	1.16914	2.33061	4.16486	5.40415	6.82403	8.17617	9.94927	193.1
Metribuzin	215.097	0.36573	0.680098	1.01383	1.84374	2.59799	3.54466	4.74249	6.12841	139.56
Mevinphos	225.053	0.147388	0.838092	2.1348	3.42119	4.50287	7.66033	9.71155	12.2792	136.59
Mexacarbate	223.147	0.322787	0.700021	1.37045	2.60913	3.49762	4.51217	5.93183	7.71386	152.28
Monocrotophos	224.069	-0.00141549	0.410976	1.29998	2.52441	3.20241	4.02869	5.41002	7.38262	139.4
Monolinuron	215.059	0.0050512	0.139117	0.476259	1.32006	2.05131	3.06954	4.36076	5.94195	142.02
Myclobutanil	289.123	0.325025	0.72691	1.38538	2.4268	3.11217	3.86829	4.83622	6.05209	176.14
Neburon	275.074	0.210741	0.987106	2.45027	3.58112	3.97914	5.30159	6.62404	8.23543	162.73
Nitenpyram	271.097	0.191349	0.511206	1.0566	1.78053	2.3267	3.3849	4.40197	5.81266	157.38
Novaluron	493.021	-0.358306	0.278459	1.82478	3.61176	4.48293	5.77548	7.06803	8.5918	203.19
Nuarimol	315.07	0.458027	0.850128	1.41353	2.50823	3.24209	3.75775	4.77667	6.02419	168.9
Oxadixyl	279.135	0.1124	0.25	1.36805	3.10956	4.13952	5.55607	7.15822	9.11525	155.64
Penconazole	284.073	0.480284	0.975947	1.72324	3.06849	4.00045	4.913	6.25885	7.77713	161.75
Pencycuron	329.148	0.487905	1.19555	2.34939	3.94475	4.96341	6.29253	7.62165	9.24786	179.27
Phenmedipham	301.119	0.486583	1.33904	2.47099	4.31612	5.59706	6.85666	8.11625	9.8721	170.59
Picoxystrobin	368.111	0.44418	1.25	2.55009	4.56104	5.8987	7.3957	8.8927	10.739	175.01
Pirimicarb	239.151	0.333057	0.802886	1.66921	3.11123	4.13474	5.4541	6.94209	8.78669	146.02
Prochloraz	376.039	0.48177	1.00361	1.70027	3.17073	4.25812	5.21574	6.72469	8.08814	180.02
Promecarb	208.133	0.344868	0.80555	1.4262	2.57365	3.42255	4.43221	6.19538	8.42034	148.8
Prometon	226.167	0.542786	1.24065	2.41296	4.22769	5.453	6.95176	8.57465	10.5648	152.45
Prometryne	242.15	0.496003	1.25537	2.52087	4.30408	5.44474	6.89507	8.34541	10.1063	157.19
Propamocarb	189.16	0.204537	0.728977	1.80841	3.63996	4.94836	6.66249	8.49967	10.6444	143.16
Propiconazole	342.078	0.439552	0.89265	1.62934	2.84665	3.68523	4.64097	5.77781	7.12787	180.29
Propoxur	210.112	0.667376	0.782655	0.844937	1.90436	3.00971	4.00501	5.436	7.35198	140.64
Prothioconazole	344.04	0.3918	0.925167	1.82887	3.31819	4.35507	5.55875	6.76243	8.12039	165.83
Pymetrozine	218.105	0.000518624	-0.126575	-0.202519	0.09037	0.47075	1.00437	1.79897	2.79364	149.28
Pyracarbolid	218.118	0.262933	0.650078	1.42483	2.82505	3.83547	5.08004	6.61456	8.5011	144.13
Pyraclostrobin	388.108	0.298747	0.984413	2.16433	4.02666	5.28876	6.78002	8.27128	10.0633	186.27
Pyridaben	365.149	0.202099	1	2.42285	4.35604	5.54066	7.07856	8.61646	10.4152	191.33
Pyrimethanil	200.121	0.302218	0.811267	1.74318	3.39393	4.59483	6.09545	7.89263	10.0626	142.27
Pyriproxyfen	322.15	0.153355	0.719852	1.73363	3.09116	3.92677	5.05292	6.17907	7.86948	186.24
Quinoxyfen	308.007	0.44461	0.900046	1.6617	2.92582	3.76938	4.65335	5.78863	7.15257	160.78
Rotenone	395.152	0.578951	1.09735	1.994	3.62355	4.79683	6.10085	7.54559	8.98392	197.34
Secbumeton	226.167	0.51779	1.18937	2.38667	4.1882	5.37495	6.86477	8.47626	10.4979	153.44
Simetryn	214.114	0.333643	0.724724	1.41758	2.72125	3.68716	4.84412	6.33449	8.11275	144.87
Spirodiclofen	411.113	0.346467	1.08698	2.40645	4.14694	5.18606	6.55578	7.95586	9.54252	190.31
Spirotetramat	374.2	0.547307	1.24993	2.33405	4.04397	5.23883	6.68296	8.12708	9.95845	193.47
Spiroxamine	298.279	0.593763	1.28371	2.4144	4.24452	5.46742	6.79618	8.39566	10.2328	178.24
Sulfentrazone	386.99	0.335888	1.14619	2.63807	4.59718	5.81998	7.61102	9.26951	11.5156	172.57
Tebuconazole	308.153	0.741363	1.77236	3.62749	6.45132	8.24591	10.2809	12.693	15.3997	160.62
Tebufenpyrad	334.174	0.50248	1.14799	2.23016	3.84104	4.81672	5.68013	6.54355	8.22838	183.25
Tebuthiuron	229.113	2.45768	3.47138	3.54735	4.63605	5.97925	6.77247	7.56568	9.51234	142.99
Teflubenzuron	380.982	-1.16168	-0.652523	1.23661	3.33998	4.20402	5.49917	6.79432	8.37842	169.28
Temephos	467.001	1.16024	2.16239	3.2222	5.67204	7.69349	9.49658	11.2997	13.8676	216.23
Terbumeton	226.167	0.463327	1.23516	2.54639	4.37883	5.55096	7.08994	8.62892	10.4847	150
Terbutryne	242.15	0.494845	1.25353	2.52794	4.32806	5.48038	6.94747	8.41455	10.1781	154.61
Tetraconazole	372.029	0.491528	1.10085	2.13106	3.69799	4.7256	5.93681	7.27671	8.91518	170.4
Thiabendazole	202.044	0.0619067	-0.041994	-0.00119792	0.598668	1.22855	2.06583	3.27581	4.85811	135.57
Thiacloprid	253.032	0.17896	0.226161	0.230517	0.44257	0.741672	1.26962	1.97983	2.90317	158.92
Thiamethoxam	292.027	0.496395	0.894817	1.23593	2.2398	3.0992	3.82283	5.11794	6.53722	157.1
Thidiazuron	221.05	0.444002	1.13052	2.43375	4.49306	5.80457	7.14011	8.47565	10.0582	147.29
Thiobencarb	258.072	0.165018	0.750909	1.80731	3.41874	4.50746	5.96619	7.63204	9.4431	155.12
Thiophanate-methyl	343.054	0.58257	1.21222	2.25307	3.77807	4.80232	6.1773	7.62819	9.25696	173
Triadimefon	294.104	0.444414	0.834288	1.17126	2.31448	3.36231	4.23515	5.10799	6.54679	172.41
Triadimenol	296.135	0.28985	0.79965	1.55527	2.86629	3.75658	4.64911	6.05516	7.4846	171.43
Tricyclazole	190.044	0.200061	0.21258	0.0822465	0.528745	1.15484	1.86496	2.91389	4.21789	130.04
Trifloxystrobin	409.146	0.410442	1.27574	2.68553	4.90927	6.42392	8.18716	9.95039	11.9288	190.48
Triflumizole	346.092	0.390657	0.865042	1.61511	3.13608	4.23449	5.23462	6.63045	8.05439	173.15
Triflumuron	359.041	-0.713522	-0.155636	1.55561	3.73875	4.85333	6.32427	7.79521	9.48466	165.83
Triticonazole	318.138	0.438672	0.920719	1.66174	2.86543	3.64387	4.42061	5.65332	7.00145	175.74
Zoxamide	336.033	0.59695	1.32253	2.45405	4.24331	5.41389	6.63208	8.14286	9.80916	167.43
2,3-Methylenedioxyamphetamine	180.1	-0.186677	-0.471928	-0.703666	-0.625921	-0.34373	0.135508	0.826672	1.8288	138.563
(+)-Methadone	310.2	0.537502	1.27202	2.47934	4.2949	5.48912	6.8975	8.5942	10.3097	176.858
(+-)-Propanolol	260	0.417446	0.976089	1.95677	3.53634	4.6342	5.98621	7.65366	9.55925	162.498
4-Fluoroamphetamine	154.1	-0.16	-1.25	-1.82	-2.23	-2.19217	-1.9	-1.30783	-0.37	132.271
4-Hydroxynirvanol	221.1	0.427227	0.770146	1.60847	2.96446	3.43352	4.00894	4.69014	5.53757	147.842
Acebutolol	337	0.329859	0.825094	1.6955	3.01956	3.84738	4.92942	6.17249	7.66917	190
Acetaminophen	152.2	-0.555451	-1.1511	-1.70063	-1.90076	-1.62813	-1.04529	-0.0876893	1.2135	130.246
Acetamiprid	223.1	0.128073	-0.0918197	-0.245501	0.010323	0.319435	0.82535	1.52558	2.51572	153.995
Acyclovir	226.1	0.51	1.15	2.24	4.25	5.54446	7.05	8.81554	10.89	143.992
Adenine	136.1	-0.791836	-1.66266	-2.64348	-3.49101	-3.74702	-3.77904	-3.57108	-3.04661	121.373
Alanine	90.1	-0.785128	-2.96883	-6.07657	-9.42015	-11.0568	-12.465	-13.62	-14.5527	118.355
Alprazolam	309.1	0.324946	0.935903	1.95038	3.39936	4.29724	5.532	6.95765	8.58971	170.398
Amitriptyline	278.1	0.542169	1.22695	2.39834	4.22794	5.46275	6.98695	8.77401	10.8404	162.314
Amphetamine	136.1	-0.4892	-1.11807	-1.70415	-1.93092	-1.74916	-1.25263	-0.389628	0.841322	130.004
Aspartic Acid	134.1	-0.803967	-2.06883	-3.70921	-5.48727	-6.30572	-6.9121	-7.30508	-7.41121	124.968
Atenolol	267	0.858438	2.08292	4.34757	8.00934	10.4196	13.3032	16.577	20.3157	154.373
Benzoylecgonine	290.1	0.352671	0.828218	1.70785	3.07129	3.87676	5.02399	6.31064	7.74341	165.177
Betaine	118	-0.6	-1.17	-1.47	-1.22	-0.68075	0.23	1.56825	3.39	116.317
Bufuralol	262	0.584467	1.33867	2.62126	4.64444	6.02934	7.65162	9.58833	11.7914	159.47
Buprenorphine	468.3	0.915787	1.41661	2.34113	3.97735	4.97562	6.12449	7.48797	9.13457	204.949
Buscopan	360.1	0.424662	1.0062	2.00389	3.52092	4.4864	5.68016	7.07829	8.73762	191.991
Buspirone	386.3	0.675179	1.28983	2.33493	3.89303	4.85687	6.11519	7.50381	9.08073	188.315
Caffeine	195.1	-0.324698	-0.609715	-0.809216	-0.720652	-0.439688	0.0594554	0.612635	1.78595	134.19
Carbamazepine	237.1	0.285982	0.802831	1.77061	3.38872	4.52834	5.94505	7.61356	9.59562	149.21
Carisoprodol	261.1	0.420373	1	2.1	4	5.2	6.5	8.4	10.4	163.046
Chloramphenicol	323	0.0294562	0.593671	1.21263	1.82058	2.47014	2.96944	4.06224	5.26078	168.259
Chlordiazepoxide	299.9	0.33	0.74	1.34	2.4	3.15342	4.08	5.19908	6.53	167.81
Chlorpheniramine	275.1	0.6	1.06	2.37	4.39	5.79983	7.46	9.30767	11.28	162.957
Chlorprothixene	316.1	0.413714	1.03658	2.10797	3.73794	4.7893	6.08963	7.62093	9.30349	168.47
Chlorthalidone	338.9	0.490796	1.07216	1.95013	3.1148	3.80542	4.76454	5.77017	7.0057	173.388
Choline	104.1	-0.8616	-1.50694	-1.80818	-1.26525	-0.44156	0.861726	2.69353	5.07808	111.942
Cimetidine	253.1	0.193522	0.414846	0.883249	1.78382	2.4734	3.47486	4.6588	6.19208	158.245
Clenbuterol	277.1	0.624219	1.40469	2.66157	4.56852	5.86895	7.31597	9.06037	11.0397	159.377
Clonazepam	316.1	0.0436212	0.469036	1.01215	1.77156	2.49588	3.15264	4.30381	5.5331	171.42
Clonidine	230	-0.0763105	-0.0809728	0.108689	0.749171	1.31122	2.13158	3.11832	4.51667	142.413
Cocaine	304.1	0.430444	1.05277	2.13843	3.8035	4.87324	6.23155	7.85429	9.43241	170.712
Cotinine	177.1	-0.0635582	-0.481464	-0.918915	-0.992363	-0.834819	-0.51176	0.00362983	0.818354	140.479
Cyromazine	167.1	-0.0629733	-0.256626	-0.237879	0.36262	0.96501	1.8771	3.05897	4.63999	129.665
Cytidine	244.1	0.0974738	0.140569	0.333515	0.903114	1.39192	2.05286	2.91261	4.22095	149.2
Desalkylflurazepam	289.1	0.39	0.81	1.56	2.75	3.61783	4.7	6.00467	7.54	161.824
Desipramine	267.2	0.432832	0.96207	1.87033	3.31102	4.33121	5.59658	7.10846	8.88136	157.261
Desomorphine	272	0.47894	1.04632	2.00642	3.47474	4.42587	5.61207	7.02938	8.63088	156.42
Desoxypipradrol	252.1	0.38	0.92	1.86	3.43	4.49925	5.79	7.33075	9.15	165.58
Diazepam	285.1	0.35805	0.897435	1.79037	3.19304	4.19624	5.39344	6.8592	8.50098	163.41
Dihydrocodeine	302.2	0.48	1	1.9	3.19	4.0705	5.14	6.4095	7.89	163.342
Dimetridazole	141.9	-0.98	-2.24	-3.57	-4.85	-5.23492	-5.33	-5.06258	-4.36	124.72
Diphenhydramine	256.2	0.574189	1.18661	2.31484	4.17718	5.40812	6.96251	8.78356	10.8873	162.08
D-Pantothenic acid	220.1	0.41848	0.65	1	2.2	2.9	4.1	5.4	7.3	138.73
Ephedrine	166.1	-0.189487	-0.507671	-0.634553	-0.238124	0.2772	1.11251	2.28787	3.86134	133.425
Epitestosterone	289.1	0.282701	0.83748	1.73298	2.96327	3.78213	4.82027	6.08541	7.59498	162.18
Ethylone	222.1	-0.000419218	0.0154882	0.268922	1.04388	1.70896	2.5883	3.73921	5.20813	148.921
Fenoterol	304.2	0.58	1.27	2.21	4.1	5.37425	6.84	8.48825	10.31	168.186
Fentanyl	337.2	0.585753	1.46103	2.87795	4.98821	6.38865	7.94658	9.78131	11.9743	186.769
Fluoxetine	310.1	0.62	1.38	2.66	4.62	5.91188	7.42	9.14062	11.07	177.32
Fluvoxamine	319.2	0.317585	0.962884	2.06691	3.71882	4.91002	6.29264	8.18214	9.19726	171.219
Gabapentin	172.1	0.00773702	-0.0334361	0.152742	0.883159	1.52998	2.36991	3.45817	4.89803	133.287
Guanine	152.3	-0.158386	-0.9	-1.9	-2.67919	-2.72868	-2.59966	-2.06765	-1.18978	129.71
Guanosine	284.3	0.489403	0.629266	1.0216	1.90301	2.4673	3.31178	4.28114	5.52059	157.903
Haloperidol	376.1	0.34016	0.809929	1.6454	2.92843	3.71654	4.74958	5.92806	7.32349	191.003
Histamine	111.8	-1.09036	-2.45811	-3.66796	-4.10396	-4.03536	-3.54838	-2.554	-1.06486	115.729
Hydrocodone	300.2	0.359247	0.851484	1.72246	3.08145	3.93136	5.02813	6.27985	7.75972	167.88
Imipramine	281.2	0.53	1.2	2.36	4.16	5.37533	6.82	8.49717	10.41	160.764
Indoprofen	282.1	0.0626669	0.549165	1.37629	2.63155	3.52433	4.63545	5.91557	7.41721	167.184
Ketamine	238.1	0.3	0.72	1.5	2.86	3.83904	5.06	6.55346	8.35	144.498
Ketoprofen	255.1	0.632756	0.72857	1.22773	2.96721	4.35125	5.9	7.4	9.03701	153.51
Ketorolac	256.1	0.0790768	0.846204	1.78556	3.18346	4.94614	6.66588	8.62294	10.9034	156.815
Lacosamide	251.1	0.537778	1.09353	2.05737	3.68958	4.91516	6.5661	8.2231	10.275	157.954
Lamotrigine	256	0.0840278	0.191369	0.438897	0.987937	1.46968	2.10329	2.97297	4.09365	152.68
L-arginine	175.2	0.00281763	0.0402573	0.35817	1.28817	2.10649	3.19297	4.65776	6.4616	129.146
L-asparagine	133.1	-0.983548	-2.25381	-3.78516	-5.29162	-5.93446	-6.35745	-6.47321	-6.29881	125.085
L-glutamic acid	148.1	-0.696626	-1.63329	-2.70867	-3.67189	-3.98772	-4.01758	-3.85104	-3.31737	127.372
L-Glycine	76	-0.322719	-3.07777	-7.7836	-13.6394	-16.6509	-19.6595	-22.6617	-25.6541	116.615
L-histidine	156.1	-0.490468	-1.08298	-1.62455	-1.80847	-1.64631	-1.19743	-0.388687	0.744841	127.682
Lidocaine	235.1	0.446551	0.906936	1.68764	3.1242	4.36651	5.86521	7.45797	9.47104	156.815
L-Isoleucine	132.1	-0.397058	-1.2949	-2.37147	-3.26153	-3.51734	-3.50298	-3.19374	-2.54988	128.156
L-leucine	132.1	-0.416042	-1.2948	-2.3588	-3.25868	-3.51231	-3.5039	-3.19126	-2.54753	129.822
L-lysine	147.2	-0.392505	-0.59206	-0.59579	-0.252342	0.211753	0.969039	2.06686	3.52135	123.446
L-methionine	150.1	-0.658544	-1.38029	-2.15045	-2.74739	-2.79185	-2.57336	-2.03399	-1.101	127.278
Lovastatin	405.2	0.580413	1.75256	3.20932	4.73245	5.9614	7.43524	9.09215	10.9857	186.933
L-phenylalanine	166.1	-0.127073	-0.645272	-1.20473	-1.47873	-1.40875	-1.07592	-0.447863	0.456147	136.059
L-proline	116.1	-1.18879	-2.78687	-4.76365	-6.73393	-7.57154	-8.15134	-8.3823	-8.22613	120.112
L-serine	106.1	-1.03248	-2.86534	-5.41945	-8.34165	-9.79336	-11.0991	-12.1942	-12.9574	120.17
L-threonine	120	-0.928572	-2.38737	-4.22752	-6.07768	-6.89153	-7.47785	-7.77674	-7.73072	122.417
L-Tyrosine	182.1	0.365872	-0.6	-1.6	-1.8	-1.9	-1.8	-1.4	-0.9	140.753
L-Valine	118.1	-0.652123	-1.8103	-3.23283	-4.53454	-4.99356	-5.22257	-5.03965	-4.54331	123.606
Malic Acid	135.1	0.402288	-1.54349	-3.94457	-5.50289	-6.27546	-7.09358	-7.2773	-7.42295	120.224
Maprotiline	278.2	0.55	1.24	2.41	4.25	5.48029	6.94	8.64221	10.6	160.505
Melamine	127.1	-0.867779	-1.78634	-2.77229	-3.56113	-3.73151	-3.64957	-3.24938	-2.48316	119.54
Melatonin	233.1	0.556124	1.07368	1.9051	3.2838	4.2923	5.65848	7.25863	9.08534	148.862
Meprobamate	219.1	0.224263	0.83145	1.78245	3.56312	5.37876	7.2	8.94307	10.4413	143.162
Methamphetamine	150	0.0111776	-0.20987	-0.165237	0.569677	1.28788	2.3179	3.65292	5.60749	133.161
Methylhistamine	126	-0.863584	-1.71627	-2.46443	-2.70917	-2.44319	-1.78664	-0.673786	0.909187	120.668
Metoprolol	268	0.569988	1.03	1.89	3.43	4.50683	5.81	7.35817	9.17	162.599
monoxidil	210.1	0.0182659	0.105392	0.39257	1.12299	1.75898	2.54171	3.56707	4.86858	143.03
Monuron	199	0	-0.1	-0.09	0.45	1.03675	1.9	3.09075	4.66	140.87
Morphine	286.1	0.329325	0.749925	1.45536	2.51867	3.23381	4.14863	5.24877	6.52263	160.195
Naproxen	231.1	0.467405	1.07799	1.9846	3.3617	4.24091	5.20178	7.19168	8.7713	150.859
Niacinamide (Nicotinamide)	123.1	-1.08844	-2.51739	-4.21431	-5.76425	-6.35079	-6.66159	-6.61758	-6.21709	123.233
Nicotinic acid (Niacin)	124.1	-1.05779	-2.5336	-4.30841	-5.94855	-6.57573	-6.91404	-6.91595	-6.53938	120.355
Nifenazone	309.1	0.66	1.22	2.39	4.18	5.75171	7.65	9.59329	11.3	170.72
Nitrazepam	282.1	0.5	0.97	1.75	3	3.91275	5.02	6.29475	7.71	166.22
N-methylephedrine	180.1	0	-0.03	0.23	0.97	1.65212	2.61	3.88787	5.53	134.989
Norepinephrine	170.1	0.58	1.25	2.45	4.32	5.56175	7.05	8.82075	10.91	136.035
Norfentanyl	233.2	0.4	0.93	1.85	3.41	4.48117	5.78	7.33633	9.18	151.22
Normeperidine	234.1	0.396026	0.913968	1.89985	3.58663	4.71749	6.11055	7.71981	9.60107	154.126
Nortriptyline	264	0.347585	0.84614	1.71255	3.09498	4.06855	5.30213	6.81434	8.59292	164.099
O-Desmethyl-cis-tramadol HCL	250.1	0.425997	1.00414	2.03417	3.70424	4.86191	6.28591	8.02058	10.0135	151.786
Oxazepam	287.1	0.341523	0.83655	1.66839	2.95874	3.88119	5.00715	6.41287	8.04701	160.745
Oxymorphone	302.1	0.383454	0.87559	1.75128	3.08847	3.86464	4.92533	6.12348	7.48811	161.06
Pamaquine	316.2	0.518009	1.2024	2.35276	4.11187	5.26657	6.67438	8.37945	9.95921	173.782
Pentedrone	192.1	0.09	-0.03	0.25	1.02	1.71554	2.69	3.99196	5.67	146.675
Perphenazine	404.2	0.822585	1.41609	2.47849	4.30195	5.47084	6.71484	8.24329	10.0567	192
Phenacetin	180	-0.0752856	-0.299024	-0.296823	0.359328	1.03675	2.01201	3.32043	5.05288	140.431
Pheniramine	241.2	0.52	1.28	2.63	4.89	6.42908	8.24	10.3084	12.62	154.61
phenyltoloxamine	256.2	0.377369	0.944324	2.01125	3.7901	5.04918	6.65845	8.59876	10.8807	153.692
Progesterone	315.2	0.210288	0.651577	1.42179	2.52852	3.18995	4.09937	5.12581	6.29523	172.018
Propafenone	342.2	0.562421	1.47007	2.98903	5.29483	6.85572	8.62329	10.7415	13.395	175.049
Protriptyline	264	0.381198	0.852905	1.69975	3.09188	4.06144	5.28672	6.77206	8.54765	159.234
Pseudoephedrine	166.1	-0.192589	-0.513942	-0.680217	-0.292177	0.235315	1.02518	2.13722	3.65257	134.852
Pyridoxal	168.1	0.395579	-0.238882	-0.818927	-0.488887	-0.13366	0.369328	1.62763	3	127.488
Quinidine	325.2	0.518071	1.19411	2.30341	4.00455	5.10771	6.40207	7.90946	9.40275	174.714
R-(-)-Nirvanol	205.1	0.510128	0.7263	1.39589	2.47219	2.58308	2.89144	3.36163	3.81802	144.497
Ractopamine	302	0.71	1.52	2.91	4.19	5.37087	6.96	8.82162	10.82	166.206
ranitidine	315.2	0.395388	0.926383	1.88071	3.35969	4.31299	5.56871	7.02738	8.70801	166.677
Retigabine	304	0.54	1.19	2.32	4.04	5.25458	6.72	8.41542	10.32	178.026
Ritalinic Acid	220.1	0.238742	0.629095	1.41588	2.85682	3.9058	5.20902	6.76197	8.66915	146.505
S-(+)-Ibuprofen	207.1	0.42071	0.921474	1.87967	3.52408	4.43473	5.00757	6.46503	8.21594	150.609
Salbutamol	240.1	0.486796	1.10334	2.21363	4.07217	5.33297	6.8307	8.58716	10.5735	152.358
Salicylic Acid	139	-1.01564	-1.79563	-3.00788	-4.69423	-5.28104	-5.65405	-5.77367	-5.65537	120.555
Sarcosine	89.8	-0.829685	-2.96959	-6.05322	-9.42502	-11.0417	-12.4666	-13.6359	-14.5078	116.507
Selegiline	188.1	0.230493	0.691258	1.79322	3.93688	5.51461	7.41162	9.67268	12.3039	139.807
Sulfadiazine	251.1	0.0461929	0.285379	0.676267	1.39386	2.02572	2.87111	3.96523	5.37609	153.355
Sulfamerazine	265	0.283402	0.689191	1.44561	2.68274	3.53125	4.64283	6.02816	7.60134	156.288
Sulfamethazine (Sulfadimidine)	278.9	0.436167	0.863688	1.70691	3.13636	4.05061	5.31135	6.80939	8.47866	159.811
Sulpiride	342.1	0.352608	0.869254	1.75664	3.08215	3.90106	4.98165	6.18281	7.59292	185.449
Tapentadol	222.1	0.333942	0.857745	1.89251	3.74699	5.07789	6.68927	8.61412	10.8374	148.117
Temazepam	301.1	0.300584	0.914327	1.96434	3.44109	4.30078	5.59988	7.03182	8.59538	164.255
Terbutaline	226.1	0.442302	1.06525	2.19671	4.07313	5.35203	6.86337	8.64208	10.6907	151.344
Testosterone	289.2	0.31408	0.768889	1.59845	2.85879	3.54807	4.57753	5.69948	6.91959	163.83
Thymine	127.1	-0.863905	-1.79215	-2.7278	-3.47443	-3.80729	-3.8627	-3.54721	-2.75619	118.313
Tolbutamide	271.1	-0.0684599	0.473384	1.37959	2.661	3.77313	5.34612	6.94211	8.70256	164.914
Tramadol	264.2	0.536156	1.19604	2.35961	4.23075	5.49152	7.02484	8.85101	10.949	158.29
Trimethoprim	291.1	0.49	0.91	1.88	3.36	4.33	5.5	6.9125	8.61	170.803
Trimipramine	295.2	0.65	1.23	2.56	4.33	5.59638	7.13	8.87363	10.77	166.376
Uracil	113	-0.890216	-2.068	-3.12798	-3.61168	-3.55134	-3.15569	-2.27843	-0.77328	115.172
Uridine	245.1	-0.596423	0.5	1.2	0.6	1	2.1	2.8	3.5	147.414
Vamidothion	288.05	-0.05259	0.5	1.53451	3.35761	4.60467	6.07182	7.74975	9.62914	156.35
Venlafaxein	278.2	0.48	1.09	2.14	3.83	4.95146	6.28	7.83604	9.64	168.461
Verapamil	455.3	1.03158	1.96566	3.57316	6.04199	7.66328	9.5127	10.2325	12.5008	217.97
Vigabatrin	130	-0.986084	-2.04056	-3.04438	-3.61088	-3.566	-3.09669	-2.20029	-0.889106	124.141
Warfarin	309.1	0.348394	1.13324	2.42921	4.19657	5.32142	6.90665	8.6787	10.5512	168.89
Xanthine	153.1	-0.153728	-0.978652	-1.96198	-2.70023	-3.00855	-3.1695	-3.1493	-2.88832	129.641
Zolpidem	308	0.333014	0.862821	1.7925	3.24543	4.19581	5.38778	6.81462	8.63679	176.165
4-Aminobutyric acid (GABA)	104.1	-1.54441	-3.1	-5	-6.9	-7.5	-7.9	-7.8	-7.2	118.267
Propoxyphene	340.1	0.607709	1.32627	2.56568	4.43218	5.62601	7.10292	8.85859	10.7438	182.509
Bendroflumethiazide	421.8	0.969114	1.67203	2.71294	4.30246	5.37777	6.6314	8.19799	9.92434	187.582
Etodolac	288	0.526262	1.28322	2.44813	4.20158	5.49175	6.85353	8.56377	10.442	168.834
Ketoconazole	531.1	0.802258	1.20018	1.98602	3.37131	4.19985	5.20419	6.47881	7.89085	211.659
L-glutamine	147.1	-0.42255	-0.614421	-0.602672	-0.255145	0.211743	0.978912	2.06362	3.52215	126.959
Loperamide	477.2	0.7648	1.36569	2.30198	3.76075	4.78969	5.86034	7.16855	8.72386	221.8
L-tryptophan	205.1	0.220989	0.0632834	0.00963063	0.41749	0.796486	1.38122	2.14478	3.08934	145.459
Midazolam	326.1	0.460749	1.00001	1.97913	3.53087	4.49597	5.7372	7.15344	8.8327	172.965
Naloxone	328.1	0.348832	0.824367	1.67529	2.97969	3.75717	4.81502	6.01876	7.34085	169.919
Norbuprenorphine	414.3	0.767737	1.47747	2.48133	3.79258	4.6621	5.76966	6.99644	8.47358	193.216
Norcodeine	286.1	0.317037	0.751906	1.46894	2.525	3.23885	4.14691	5.26099	6.52093	166.203
Noroxycodone HCL	302.1	0.343978	0.873152	1.76578	3.06501	3.8502	4.91173	6.10407	7.40382	163.46
Norsertraline HCL	292.06	0.366464	1.13838	2.2396	3.36563	3.97864	5.15024	6.72056	8.72552	162.643
Prazosin	383.8	0.47863	1.17567	2.27716	3.83769	4.82197	6.01562	7.38089	8.88683	197.627
Prednisolone	361.1	0.420664	0.933208	1.79099	2.99808	3.68736	4.77803	5.82389	7.08354	177.841
Safranin O	315.1	0.314687	0.861537	1.81815	3.24026	4.13662	5.30656	6.71087	8.32678	176.272
Sotalol	273.1	0.454011	1.05437	2.07899	3.64038	4.70341	6.01493	7.57664	9.38479	162.811
Tamoxifen	372.1	0.594459	1.51803	2.99295	5.12952	6.51934	8.06033	9.84511	11.9786	200.251
Taurocholic Acid	516.3	0.851872	1.81834	3.42112	5.76306	7.34126	9.24436	11.5483	14.1788	195.216
Terfenadine	472.3	0.754419	1.52988	2.76556	4.49246	5.58968	6.83628	8.34624	9.98793	231.073
Urapidil	388.2	0.64947	1.16783	2.05928	3.50648	4.46758	5.54033	6.84927	8.42539	184.834

## Sheet: MRM Transitions
Name	Q1	Q3
5-Cl-MQOH	194.04
5-CN-MQOH	185.07
5-F-MQOH	178.07
5-Me-MQOH	174.09
5-NO2-MQOH	205.06
5-OMe-MQOH	190.09
6-amino-2-MQ	159.1
6-Cl-MQOH	194.04
6-CN-MQOH	185.07
6-F-MQOH	178.07
6-Me-MQOH	174.09
6-methoxy-2-MQ	174.1
6-methyl-2-MQ	158.1
6-nitro-2-MQ	189.1
6-NO2-MQOH	205.06
6-OMe-MQOH	190.09
7-chloro-2-MQ	178.1
7-Cl-MQOH	194.04
7-CN-MQOH	185.07
7-F-MQOH	178.07
7-Me-MQOH	174.09
7-NO2-MQOH	205.06
7-OMe-MQOH	190.09
8-amino-2-MQ	159.1
8-chloro-2-MQ	178.1
8-methoxy-2-MQ	174.1
8-methyl-2-MQ	158.1
8-nitro-2-MQ	189.1
A1a	262.09
A1b	262.09
A2a	259.1
A2b	259.1
A3a	258.1
A3b	258.1
A4a	286.1
A4b	286.1
A4c	286.1
A5a	364
A5b	364
A6a	348.1
A6b	348.1
B2a	277.16
B2b	277.16
B3a	335.1
B3b	335.1
B4a	381.1
B4b	381.1
C1a	403.13
C1b	403.13
C2a	326.16
C2b	326.16
C3a	429.15
C3b	429.15
C4a	429.15
C4b	429.15
C5a	410.19
C5b	410.19
CRG1a	162.1
CRG1b	149.1
CRG1d	178.1
CRG1g	178.1
CRG2a	86.06
CRG2b	162.1
CRG2c	142.1
CRG2d	140.1
CRG3a	98.06
CRG3b	162.1
CRG3e	114.1
CRG3f	126.1
CRG3g	100.1
CRG3i	112.1
CRG4a	130.1
CRG4b	116.1
MQOH	160.08
3-Hydroxycarbofuran	238.108	163
Acibenzolar-S-methyl	211	152.1
Aldicarb sulfone	223.075	148
Ametryn	228.13	186.1
Aminocarb	209.129	152.1
Amitraz	294.201	163.2
Azoxystrobin	404.125	372.1
Benalaxyl	326.177	148.2
Benzoximate	364.075	105
Bifenazate	301.156	152.1
Bitertanol	338.187	99.1
Boscalid	343.04	140
Bupirimate	317.166	166
Buprofezin	306.169	201.1
Butafenacil	475.088	331
Butoxycarboxim	223.075	106
Carbendazim	192.077	160.05
Carbetamide	237.124	192
Carbofuran	222.113	123.04
Carboxin	236.075	143
Carfentrazone-ethyl	412.044	346
Chlorfluazuron	539.97	383
Chloroxuron	291.091	72
Chlortoluron	213.08	46.2
Clethodim	360.141	164
Clofentezine	303.02	138
Clothianidin	250.016	169.1
Cyazofamid	325.052	261
Cycluron	199.181	89
Cyproconazole	292.121	125.2
Cyprodinil	226.139	93
Desmedipham	301.119	182
Diclobutrazol	328.099	159
Dicrotophos	238.084	72
Diethofencarb	268.155	226
Difenoconazole	406.073	251.1
Diflubenzuron	311.04	141
Dimethoate	230.007	199.1
Dimethomorph	388.133	301.1
Dimoxystrobin	327.171	116
Diniconazole	326.083	159
Dioxacarb	224.092	123
Diuron	233.025	72.1
Epoxiconazole	330.082	121
Etaconazole	328.062	123
Ethiprole	396.991	350.9
Ethirimol	210.161	98.1
Ethofumesate	287.095	161
Etoxazole	360.185	141
Famoxadon	375.133	331
Fenamidone	312.118	92.1
Fenarimol	331.041	81
Fenazaquin	307.184	147
Fenbuconazole	337.123	125
Fenhexamid	302.071	55
Fenobucarb	208.134	95
Fenoxycarb	302.14	256.1
Fenpropimorph	304.264	147
Fenpyroximate	422.209	366.1
Fenuron	165.103	72.1
Fipronil	436.946	367.9
Flonicamid	230.054	174
Flufenacet	364.075	152.2
Flufenoxuron	489.045	141.2
Fluoxastrobin	459.092	188
Fluquinconazole	376.017	349
Flusilazole	316.109	247
Flutolanil	324.125	262
Flutriafol	302.112	70
Forchlorfenuron	248.059	129.1
Fuberidazole	185.071	157
Furalaxyl	302.143	242.1
Furathiocarb	383.169	195.2
Hexaconazole	314.083	70
Hexaflumuron	460.989	158.2
Hexythiazox	353.112	168
Hydramethylnon	495.199	323.1
Indoxacarb	528.078	203
Ipconazole	334.169	70
Iprovalicarb	321.218	119
Isoprocarb	194.118	137.2
Isoproturon	207.15	72.1
Kresoxim-methyl	314.139	267.2
Linuron	249.02	160
Lufenuron	510.986	158.1
Mandipropamid	412.136	328.1
Mefenacet	299.087	148.1
Mepanipyrim	224.123	77
Mepronil	270.151	119.1
Mesotrione	340.049	228
Metaflumizone	507.126	178.1
Metalaxyl	280.157	192.3
Metconazole	320.153	70
Methabenzthiazuron	222.07	165.2
Methamidophos	142.009	125
Methiocarb	226.108	169.2
Methoprotryne	272.154	240.2
Methoxyfenozide	369.218	149
Metribuzin	215.097	187.2
Mevinphos	225.053	127
Mexacarbate	223.147	166.2
Monocrotophos	224.069	127
Monolinuron	215.059	126.1
Myclobutanil	289.123	125
Neburon	275.074	88
Nitenpyram	271.097	126.1
Novaluron	493.021	158.1
Nuarimol	315.07	81
Oxadixyl	279.135	132.1
Penconazole	284.073	159
Pencycuron	329.148	125.1
Phenmedipham	301.119	168.1
Picoxystrobin	368.111	145
Pirimicarb	239.151	72.1
Prochloraz	376.039	308
Promecarb	208.133	151.1
Prometon	226.167	142.1
Prometryne	242.15	200.1
Propamocarb	189.16	73.9
Propiconazole	342.078	159.1
Propoxur	210.112	168.1
Prothioconazole	344.04	326
Pymetrozine	218.105	105
Pyracarbolid	218.118	125
Pyraclostrobin	388.108	194
Pyridaben	365.149	309
Pyrimethanil	200.121	107
Pyriproxyfen	322.15	185
Quinoxyfen	308.007	197
Rotenone	395.152	192
Secbumeton	226.167	170
Simetryn	214.114	124
Spirodiclofen	411.113	71.3
Spirotetramat	374.2	330.2
Spiroxamine	298.279	100.2
Sulfentrazone	386.99	273
Tebuconazole	308.153	70
Tebufenpyrad	334.174	145
Tebuthiuron	229.113	172.4
Teflubenzuron	380.982	141.2
Temephos	467.001	405
Terbumeton	226.167	170
Terbutryne	242.15	68.1
Tetraconazole	372.029	159
Thiabendazole	202.044	131.2
Thiacloprid	253.032	126.1
Thiamethoxam	292.027	211
Thidiazuron	221.05	102.1
Thiobencarb	258.072	125
Thiophanate-methyl	343.054	151
Triadimefon	294.104	225
Triadimenol	296.135	70.1
Tricyclazole	190.044	136
Trifloxystrobin	409.146	186
Triflumizole	346.092	278
Triflumuron	359.041	156.2
Triticonazole	318.138	70
Zoxamide	336.033	186.9
2,3-Methylenedioxyamphetamine	180.1	163.1
(+)-Methadone	310.2	265.2
(+-)-Propanolol	260	116.1
4-Fluoroamphetamine	154.1	108.9
4-Hydroxynirvanol	221.1	148.1
7-Aminoclonazepam	286.1	222.2
Acebutolol	337	116
Acetaminophen	152.2	110.1
Acetamiprid	223.1	126
Acyclovir	226.1	152.1
Adenine	136.1	119.1
Alanine	90.1	43.9
Alprazolam	309.1	281.3
Amitriptyline	278.1	91.1
Amphetamine	136.1	91.1
Aspartic Acid	134.1	74
Atenolol	267	145.1
Benzoylecgonine	290.1	168.1
Betaine	118	58.1
Bufuralol	262	188.1
Buprenorphine	468.3	396.2
Buscopan	360.1	194.1
Buspirone	386.3	122.1
Caffeine	195.1	138.1
Carbamazepine	237.1	194.1
Carisoprodol	261.1	176.2
Chloramphenicol	323	275
Chlordiazepoxide	299.9	227.1
Chlorpheniramine	275.1	230.2
Chlorprothixene	316.1	231.1
Chlorthalidone	338.9	322
Choline	104.1	60
Cimetidine	253.1	95.1
Clenbuterol	277.1	203.1
Clonazepam	316.1	270.1
Clonidine	230	213
Cocaine	304.1	182.1
Cotinine	177.1	80
Cyromazine	167.1	85.1
Cytidine	244.1	112
Desalkylflurazepam	289.1	140.1
Desipramine	267.2	72.1
Desomorphine	272	167
Desoxypipradrol	252.1	91.1
Diazepam	285.1	193.1
Dihydrocodeine	302.2	199.2
Dimetridazole	141.9	96.1
Diphenhydramine	256.2	167.1
D-Pantothenic acid	220.1	90.1
Ephedrine	166.1	148.1
Epitestosterone	289.1	97
Ethylone	222.1	174.1
Fenoterol	304.2	135.1
Fentanyl	337.2	188.1
Fluoxetine	310.1	91.1
Fluvoxamine	319.2	200.2
Gabapentin	172.1	137.1
Guanine	152.3	135.1
Guanosine	284.3	152.1
Haloperidol	376.1	165.1
Histamine	111.8	95
Hydrocodone	300.2	199.1
Imidacloprid	256.2	209.1
Imipramine	281.2	86.1
Indoprofen	282.1	236.1
Ketamine	238.1	125
Ketoprofen	255.1	209.2
Ketorolac	256.1	105.1
Lacosamide	251.1	108.1
Lamotrigine	256	211
L-arginine	175.2	69.9
L-asparagine	133.1	73.9
L-glutamic acid	148.1	84
L-Glycine	76	30
L-histidine	156.1	110
Lidocaine	235.1	86.2
L-Isoleucine	132.1	86.2
L-leucine	132.1	86.2
L-lysine	147.2	84
L-methionine	150.1	55.9
Lovastatin	405.2	285.2
L-phenylalanine	166.1	120.1
L-proline	116.1	70
L-serine	106.1	59.9
L-threonine	120	74
L-Tyrosine	182.1	136
L-Valine	118.1	72
Malic Acid	135.1	89.1
Maprotiline	278.2	191.1
Melamine	127.1	85.1
Melatonin	233.1	174.1
Meprobamate	219.1	158.1
Methamphetamine	150	91
Methylhistamine	126	109
Metoprolol	268	116
monoxidil	210.1	193.1
Monuron	199	72.2
Morphine	286.1	152.2
Naproxen	231.1	185.1
Niacinamide (Nicotinamide)	123.1	80
Nicotinic acid (Niacin)	124.1	80.1
Nifenazone	309.1	291.1
Nitrazepam	282.1	236.2
N-methylephedrine	180.1	147
Norepinephrine	170.1	107
Norfentanyl	233.2	84.1
Normeperidine	234.1	160
Nortriptyline	264	91
O-Desmethyl-cis-tramadol HCL	250.1	58
Oxazepam	287.1	241.2
Oxymorphone	302.1	284.1
Pamaquine	316.2	243.1
Pentedrone	192.1	132.1
Perphenazine	404.2	171.2
Phenacetin	180	110.1
Pheniramine	241.2	196.2
phenyltoloxamine	256.2	72
Progesterone	315.2	109.1
Propafenone	342.2	116.1
Protriptyline	264	155
Pseudoephedrine	166.1	148.1
Pyridoxal	168.1	150
Quinidine	325.2	307.2
R-(-)-Nirvanol	205.1	134.1
Ractopamine	302	164.1
ranitidine	315.2	176.1
Retigabine	304	109
Ritalinic Acid	220.1	84.1
S-(+)-Ibuprofen	207.1	161.1
Salbutamol	240.1	148
Salicylic Acid	139	121
Sarcosine	89.8	44.1
Selegiline	188.1	65
Sulfadiazine	251.1	92.1
Sulfamerazine	265	156
Sulfamethazine (Sulfadimidine)	278.9	186
Sulpiride	342.1	112.1
Tapentadol	222.1	107
Temazepam	301.1	255.2
Terbutaline	226.1	152.1
Testosterone	289.2	109.1
Thymine	127.1	110
Tolbutamide	271.1	155
Tramadol	264.2	58
Trimethoprim	291.1	230.2
Trimipramine	295.2	100.2
Uracil	113	43
Uridine	245.1	113
Vamidothion	288.05	146.1
Venlafaxein	278.2	260.2
Verapamil	455.3	165.2
Vigabatrin	130	113.1
Warfarin	309.1	163.1
Xanthine	153.1	136.1
Zolpidem	308	235.2
4-Aminobutyric acid (GABA)	104.1	87
(+)-Propoxyphene	340.1	266.1
Bendroflumethiazide	421.8	105
Etodolac	288	172.2
Ketoconazole	531.1	489
L-glutamine	147.1	84.1
Loperamide	477.2	266.4
L-tryptophan	205.1	188.1
Midazolam	326.1	291.1
Naloxone	328.1	212.1
Norbuprenorphine	414.3	83.1
Norcodeine	286.1	152.1
Noroxycodone HCL	302.1	187.1
Norsertraline HCL	292.06	159.1
Prazosin	383.8	247.1
Prednisolone	361.1	147.1
Safranin O	315.1	238.1
Sotalol	273.1	133.1
Tamoxifen	372.1	72.1
Taurocholic Acid	516.3	462.2
Terfenadine	472.3	436.3
Urapidil	388.2	205.2

## Sheet: ClassyFire
Compound	InChI Key	InChIKey	ClassyFy Status	Kingdom	Superclass	Class	Subclass	Parent Level 1	Parent Level 2	Parent Level 3	Parent Level 4	Parent Level 5		Superclass			Class
3-Hydroxycarbofuran	RHSUJRQZTQNSLL-UHFFFAOYSA-N	RHSUJRQZTQNSLL-UHFFFAOYSA-N	Completed	Organic compounds	Organoheterocyclic compounds	Coumarans		Coumarans						Alkaloids and derivatives	6		Anthracenes	1
7-aminoclonazepam	HEFRPWRJTGLSSV-UHFFFAOYSA-N	HEFRPWRJTGLSSV-UHFFFAOYSA-N	Completed	Organic compounds	Organoheterocyclic compounds	Benzodiazepines	1,4-benzodiazepines	1,4-benzodiazepines						Benzenoids	185		Azoles	13
Acibenzolar-S-methyl	UELITFHSCLAHKR-UHFFFAOYSA-N	UELITFHSCLAHKR-UHFFFAOYSA-N	Completed	Organic compounds	Organoheterocyclic compounds	Benzothiadiazoles		Benzothiadiazoles						Lipids and lipid-like molecules	12		Azolidines	2
Aldicarb sulfone	YRRKLBAKDXSTNC-WEVVVXLNSA-N	YRRKLBAKDXSTNC-WEVVVXLNSA-N	Completed	Organic compounds	Organosulfur compounds	Sulfonyls	Sulfones	Sulfones						Nucleosides, nucleotides, and analogues	3		Benzazepines	4
Ametryn	RQVYBGPQFYCBGX-UHFFFAOYSA-N	RQVYBGPQFYCBGX-UHFFFAOYSA-N	Completed	Organic compounds	Organoheterocyclic compounds	Triazines	1,3,5-triazines	Methylthio-s-triazines						Organic acids and derivatives	41		Benzene and substituted derivatives	157
Aminocarb	IMIDOCRTMDIQIJ-UHFFFAOYSA-N	IMIDOCRTMDIQIJ-UHFFFAOYSA-N	Completed	Organic compounds	Benzenoids	Benzene and substituted derivatives	Phenoxy compounds	Phenoxy compounds						Organic nitrogen compounds	9		Benzimidazoles	3
Amitraz	QXAITBQSYVNQDR-UHFFFAOYSA-N	QXAITBQSYVNQDR-UHFFFAOYSA-N	Completed	Organic compounds	Benzenoids	Benzene and substituted derivatives	Xylenes	m-Xylenes						Organic oxygen compounds	11		Benzodiazepines	10
Azoxystrobin	WFDXOXNFNRHQEC-GHRIWEEISA-N	WFDXOXNFNRHQEC-GHRIWEEISA-N	Completed	Organic compounds	Benzenoids	Benzene and substituted derivatives	Phenyl-beta-methoxyacrylates	Phenyl-beta-methoxyacrylates						Organoheterocyclic compounds	127		Benzodioxoles	2
Benalaxyl	CJPQIRJHIZUAQP-UHFFFAOYSA-N	CJPQIRJHIZUAQP-UHFFFAOYSA-N	Completed	Organic compounds	Organic acids and derivatives	Carboxylic acids and derivatives	Amino acids, peptides, and analogues	Amino acids and derivatives	Alpha amino acids and derivatives	Alpha amino acid esters				Organophosphorus compounds	1		Benzofurans	1
Benzoximate	BZMIHNKNQJJVRO-UHFFFAOYSA-N	BZMIHNKNQJJVRO-UHFFFAOYSA-N	Completed	Organic compounds	Benzenoids	Benzene and substituted derivatives	Benzyloxycarbonyls	Benzyloxycarbonyls						Organosulfur compounds	3		Benzothiadiazoles	1
Bifenazate	VHLKTXFWDRXILV-UHFFFAOYSA-N	VHLKTXFWDRXILV-UHFFFAOYSA-N	Completed	Organic compounds	Benzenoids	Benzene and substituted derivatives	Biphenyls and derivatives	Biphenyls and derivatives						Phenylpropanoids and polyketides	11		Benzothiazines	1
Bitertanol	VGPIBGGRCVEHQZ-UHFFFAOYSA-N	VGPIBGGRCVEHQZ-UHFFFAOYSA-N	Completed	Organic compounds	Benzenoids	Benzene and substituted derivatives	Biphenyls and derivatives	Biphenyls and derivatives									Benzothiazoles	2
Boscalid	WYEMLYFITZORAB-UHFFFAOYSA-N	WYEMLYFITZORAB-UHFFFAOYSA-N	Completed	Organic compounds	Benzenoids	Benzene and substituted derivatives	Anilides	Aromatic anilides									Benzothiopyrans	1
Bupirimate	DSKJPMWIHSOYEA-UHFFFAOYSA-N	DSKJPMWIHSOYEA-UHFFFAOYSA-N	Completed	Organic compounds	Organoheterocyclic compounds	Diazines	Pyrimidines and pyrimidine derivatives	Aminopyrimidines and derivatives									Benzotriazoles	1
Buprofezin	PRLVTUNWOQKEAI-UHFFFAOYSA-N	PRLVTUNWOQKEAI-UHFFFAOYSA-N	Completed	Organic compounds	Organoheterocyclic compounds	Thiadiazinanes		Thiadiazinanes									Carboxylic acids and derivatives	34
Butafenacil	JEDYYFXHPAIBGR-UHFFFAOYSA-N	JEDYYFXHPAIBGR-UHFFFAOYSA-N	Completed	Organic compounds	Benzenoids	Benzene and substituted derivatives	Benzoic acids and derivatives	Benzoic acid esters									Cinchona alkaloids	1
Butoxycarboxim	CTJBHIROCMPUKL-WEVVVXLNSA-N	CTJBHIROCMPUKL-WEVVVXLNSA-N	Completed	Organic compounds	Organosulfur compounds	Sulfonyls	Sulfones	Sulfones									Cinnamyl alcohols	1
Carbendazim	TWFZGCMQGLPBSX-UHFFFAOYSA-N	TWFZGCMQGLPBSX-UHFFFAOYSA-N	Completed	Organic compounds	Organoheterocyclic compounds	Benzimidazoles	2-benzimidazolylcarbamic acid esters	2-benzimidazolylcarbamic acid esters									Coumarans	4
Carbetamide	AMRQXHFXNZFDCH-UHFFFAOYSA-N	AMRQXHFXNZFDCH-UHFFFAOYSA-N	Completed	Organic compounds	Benzenoids	Benzene and substituted derivatives	Phenylcarbamic acid esters	Phenylcarbamic acid esters									Coumarins and derivatives	1
Carbofuran	DUEPRVBVGDRKAG-UHFFFAOYSA-N	DUEPRVBVGDRKAG-UHFFFAOYSA-N	Completed	Organic compounds	Organoheterocyclic compounds	Coumarans		Coumarans									Diazanaphthalenes	3
Carboxin	GYSSRZJIHXQEHQ-UHFFFAOYSA-N	GYSSRZJIHXQEHQ-UHFFFAOYSA-N	Completed	Organic compounds	Benzenoids	Benzene and substituted derivatives	Anilides	Anilides									Diazinanes	4
Carfentrazone-ethyl	MLKCGVHIFJBRCD-UHFFFAOYSA-N	MLKCGVHIFJBRCD-UHFFFAOYSA-N	Completed	Organic compounds	Organoheterocyclic compounds	Azoles	Triazoles	Phenyltriazoles	Phenyl-1,2,4-triazoles								Diazines	4
Chlorfluazuron	UISUNVFOGSJSKD-UHFFFAOYSA-N	UISUNVFOGSJSKD-UHFFFAOYSA-N	Completed	Organic compounds	Benzenoids	Benzene and substituted derivatives	N-phenylureas	N-acyl-phenylureas	N-benzoyl-N'-phenylureas								Dibenzocycloheptenes	3
Chloroxuron	IVUXTESCPZUGJC-UHFFFAOYSA-N	IVUXTESCPZUGJC-UHFFFAOYSA-N	Completed	Organic compounds	Benzenoids	Benzene and substituted derivatives	Diphenylethers	Diphenylethers									Fatty Acyls	5
Chlortoluron	JXCGFZXSOMJFOA-UHFFFAOYSA-N	JXCGFZXSOMJFOA-UHFFFAOYSA-N	Completed	Organic compounds	Benzenoids	Benzene and substituted derivatives	N-phenylureas	N-phenylureas									Hydroxy acids and derivatives	2
Clethodim	SILSDTWXNBZOGF-KUZBFYBWSA-N	SILSDTWXNBZOGF-KUZBFYBWSA-N	Completed	Organic compounds	Organic oxygen compounds	Organooxygen compounds	Carbonyl compounds	Ketones	Cyclic ketones	Cyclohexenones							Imidazopyrimidines	5
Clofentezine	UXADOQPNKNTIHB-UHFFFAOYSA-N	UXADOQPNKNTIHB-UHFFFAOYSA-N	Completed	Organic compounds	Benzenoids	Benzene and substituted derivatives	Halobenzenes	Chlorobenzenes									Indoles and derivatives	3
Clothianidin	PGOOBECODWQEAB-UHFFFAOYSA-N	PGOOBECODWQEAB-UHFFFAOYSA-N	Completed	Organic compounds	Organoheterocyclic compounds	Azoles	Thiazoles	2,5-disubstituted thiazoles									Isoflavonoids	1
Cyazofamid	YXKMMRDKEKCERS-UHFFFAOYSA-N	YXKMMRDKEKCERS-UHFFFAOYSA-N	Completed	Organic compounds	Organoheterocyclic compounds	Azoles	Imidazoles	Substituted imidazoles	Phenylimidazoles								Isoindoles and derivatives	1
Cycluron	DQZCVNGCTZLGAQ-UHFFFAOYSA-N	DQZCVNGCTZLGAQ-UHFFFAOYSA-N	Completed	Organic compounds	Organic acids and derivatives	Organic carbonic acids and derivatives	Ureas	Ureas									Lactones	1
Cyproconazole	UFNOUKDBUJZYDE-UHFFFAOYSA-N	UFNOUKDBUJZYDE-UHFFFAOYSA-N	Completed	Organic compounds	Benzenoids	Benzene and substituted derivatives	Phenylpropanes	Phenylpropanes									Linear 1,3-diarylpropanoids	2
Cyprodinil	HAORKNGNJCEJBX-UHFFFAOYSA-N	HAORKNGNJCEJBX-UHFFFAOYSA-N	Completed	Organic compounds	Benzenoids	Benzene and substituted derivatives	Aniline and substituted anilines	Aniline and substituted anilines									Morphinans	5
Desmedipham	WZJZMXBKUWKXTQ-UHFFFAOYSA-N	WZJZMXBKUWKXTQ-UHFFFAOYSA-N	Completed	Organic compounds	Benzenoids	Benzene and substituted derivatives	Phenylcarbamic acid esters	Phenylcarbamic acid esters									Naphthalenes	4
Diclobutrazol	URDNHJIVMYZFRT-UHFFFAOYSA-N	URDNHJIVMYZFRT-UHFFFAOYSA-N	Completed	Organic compounds	Benzenoids	Benzene and substituted derivatives	Phenethylamines	Amphetamines and derivatives									Organic carbonic acids and derivatives	1
Dicrotophos	VEENJGZXVHKXNB-VOTSOKGWSA-N	VEENJGZXVHKXNB-VOTSOKGWSA-N	Completed	Organic compounds	Organic acids and derivatives	Organic phosphoric acids and derivatives	Phosphate esters	Alkyl phosphates	Dialkyl phosphates								Organic dithiophosphoric acids and derivatives	1
Diethofencarb	LNJNFVJKDJYTEU-UHFFFAOYSA-N	LNJNFVJKDJYTEU-UHFFFAOYSA-N	Completed	Organic compounds	Benzenoids	Benzene and substituted derivatives	Phenylcarbamic acid esters	Phenylcarbamic acid esters									Organic phosphoric acids and derivatives	2
Difenoconazole	BQYJATMQXGBDHF-UHFFFAOYSA-N	BQYJATMQXGBDHF-UHFFFAOYSA-N	Completed	Organic compounds	Benzenoids	Benzene and substituted derivatives	Diphenylethers	Diphenylethers									Organic thiophosphoric acids and derivatives	1
Diflubenzuron	QQQYTWIFVNKMRW-UHFFFAOYSA-N	QQQYTWIFVNKMRW-UHFFFAOYSA-N	Completed	Organic compounds	Benzenoids	Benzene and substituted derivatives	N-phenylureas	N-acyl-phenylureas	N-benzoyl-N'-phenylureas								Organonitrogen compounds	9
Dimethoate	MCWXGJITAZMZEV-UHFFFAOYSA-N	MCWXGJITAZMZEV-UHFFFAOYSA-N	Completed	Organic compounds	Organic acids and derivatives	Organic dithiophosphoric acids and derivatives	Dithiophosphate O-esters	Dithiophosphate O-esters									Organooxygen compounds	11
Dimethomorph	QNBTYORWCCMPQP-NBVRZTHBSA-N	QNBTYORWCCMPQP-NBVRZTHBSA-N	Completed	Organic compounds	Benzenoids	Benzene and substituted derivatives	Diphenylmethanes	Diphenylmethanes									Organothiophosphorus compounds	1
Dimoxystrobin	WXUZAHCNPWONDH-DYTRJAOYSA-N	WXUZAHCNPWONDH-DYTRJAOYSA-N	Completed	Organic compounds	Benzenoids	Benzene and substituted derivatives	Phenylacetamides	Phenylacetamides									Phenanthrenes and derivatives	5
Diniconazole	FBOUIAKEJMZPQG-AWNIVKPZSA-N	FBOUIAKEJMZPQG-AWNIVKPZSA-N	Completed	Organic compounds	Phenylpropanoids and polyketides	Cinnamyl alcohols		Cinnamyl alcohols									Phenol ethers	9
Dioxacarb	SDKQRNRRDYRQKY-UHFFFAOYSA-N	SDKQRNRRDYRQKY-UHFFFAOYSA-N	Completed	Organic compounds	Benzenoids	Benzene and substituted derivatives	Phenoxy compounds	Phenoxy compounds									Phenols	5
Diuron	XMTQQYYKAHVGBJ-UHFFFAOYSA-N	XMTQQYYKAHVGBJ-UHFFFAOYSA-N	Completed	Organic compounds	Benzenoids	Benzene and substituted derivatives	N-phenylureas	N-phenylureas									Phenylpropanoic acids	2
Epoxiconazole	ZMYFCFLJBGAQRS-UHFFFAOYSA-N	ZMYFCFLJBGAQRS-UHFFFAOYSA-N	Completed	Organic compounds	Phenylpropanoids and polyketides	Stilbenes		Stilbenes									Piperidines	3
Etaconazole	DWRKFAJEBUWTQM-UHFFFAOYSA-N	DWRKFAJEBUWTQM-UHFFFAOYSA-N	Completed	Organic compounds	Benzenoids	Benzene and substituted derivatives	Halobenzenes	Chlorobenzenes	Dichlorobenzenes								Prenol lipids	2
Ethiprole	FNELVJVBIYMIMC-UHFFFAOYSA-N	FNELVJVBIYMIMC-UHFFFAOYSA-N	Completed	Organic compounds	Organoheterocyclic compounds	Azoles	Pyrazoles	Phenylpyrazoles									Purine nucleosides	1
Ethirimol	BBXXLROWFHWFQY-UHFFFAOYSA-N	BBXXLROWFHWFQY-UHFFFAOYSA-N	Completed	Organic compounds	Organoheterocyclic compounds	Diazines	Pyrimidines and pyrimidine derivatives	Hydroxypyrimidines									Pyridines and derivatives	13
Ethofumesate	IRCMYGHHKLLGHV-UHFFFAOYSA-N	IRCMYGHHKLLGHV-UHFFFAOYSA-N	Completed	Organic compounds	Organoheterocyclic compounds	Coumarans		Coumarans									Pyrimidine nucleosides	2
Etoxazole	IXSZQYVWNJNRAL-UHFFFAOYSA-N	IXSZQYVWNJNRAL-UHFFFAOYSA-N	Completed	Organic compounds	Benzenoids	Benzene and substituted derivatives	Phenylpropanes	Phenylpropanes									Pyrrolidines	2
Famoxadon	PCCSBWNGDMYFCW-UHFFFAOYSA-N	PCCSBWNGDMYFCW-UHFFFAOYSA-N	Completed	Organic compounds	Benzenoids	Benzene and substituted derivatives	Diphenylethers	Diphenylethers									Quinolines and derivatives	30
Fenamidone	LMVPQMGRYSRMIW-KRWDZBQOSA-N	LMVPQMGRYSRMIW-KRWDZBQOSA-N	Completed	Organic compounds	Organic acids and derivatives	Carboxylic acids and derivatives	Amino acids, peptides, and analogues	Amino acids and derivatives	Alpha amino acids and derivatives								Steroids and steroid derivatives	5
Fenarimol	NHOWDZOIZKMVAI-UHFFFAOYSA-N	NHOWDZOIZKMVAI-UHFFFAOYSA-N	Completed	Organic compounds	Benzenoids	Benzene and substituted derivatives	Diphenylmethanes	Diphenylmethanes									Stilbenes	4
Fenazaquin	DMYHGDXADUDKCQ-UHFFFAOYSA-N	DMYHGDXADUDKCQ-UHFFFAOYSA-N	Completed	Organic compounds	Organoheterocyclic compounds	Diazanaphthalenes	Benzodiazines	Quinazolines									Sulfonyls	2
Fenbuconazole	RQDJADAKIFFEKQ-UHFFFAOYSA-N	RQDJADAKIFFEKQ-UHFFFAOYSA-N	Completed	Organic compounds	Phenylpropanoids and polyketides	Linear 1,3-diarylpropanoids		Linear 1,3-diarylpropanoids									Tetralins	1
Fenhexamid	VDLGAVXLJYLFDH-UHFFFAOYSA-N	VDLGAVXLJYLFDH-UHFFFAOYSA-N	Completed	Organic compounds	Benzenoids	Benzene and substituted derivatives	Anilides	Anilides									Thiadiazinanes	1
Fenobucarb	DIRFUJHNVNOBMY-UHFFFAOYSA-N	DIRFUJHNVNOBMY-UHFFFAOYSA-N	Completed	Organic compounds	Benzenoids	Benzene and substituted derivatives	Phenyl methylcarbamates	Phenyl methylcarbamates									Thiadiazines	1
Fenoxycarb	HJUFTIJOISQSKQ-UHFFFAOYSA-N	HJUFTIJOISQSKQ-UHFFFAOYSA-N	Completed	Organic compounds	Benzenoids	Benzene and substituted derivatives	Diphenylethers	Diphenylethers									Thioethers	1
Fenpropimorph	RYAUSSKQMZRMAI-ALOPSCKCSA-N	RYAUSSKQMZRMAI-ALOPSCKCSA-N	Completed	Organic compounds	Benzenoids	Benzene and substituted derivatives	Phenylpropanes	Phenylpropanes									Triazines	11
Fenpyroximate	YYJNOYZRYGDPNH-MFKUBSTISA-N	YYJNOYZRYGDPNH-MFKUBSTISA-N	Completed	Organic compounds	Organic oxygen compounds	Organooxygen compounds	Ethers	Diarylethers
Fenuron	XXOYNJXVWVNOOJ-UHFFFAOYSA-N	XXOYNJXVWVNOOJ-UHFFFAOYSA-N	Completed	Organic compounds	Benzenoids	Benzene and substituted derivatives		Benzene and substituted derivatives
Fipronil	ZOCSXAVNDGMNBV-UHFFFAOYSA-N	ZOCSXAVNDGMNBV-UHFFFAOYSA-N	Completed	Organic compounds	Organoheterocyclic compounds	Azoles	Pyrazoles	Phenylpyrazoles
Flonicamid	RLQJEEJISHYWON-UHFFFAOYSA-N	RLQJEEJISHYWON-UHFFFAOYSA-N	Completed	Organic compounds	Organoheterocyclic compounds	Pyridines and derivatives	Pyridinecarboxylic acids and derivatives	Pyridinecarboxamides	Nicotinamides
Flufenacet	IANUJLZYFUDJIH-UHFFFAOYSA-N	IANUJLZYFUDJIH-UHFFFAOYSA-N	Completed	Organic compounds	Benzenoids	Benzene and substituted derivatives	Anilides	Anilides
Flufenoxuron	RYLHNOVXKPXDIP-UHFFFAOYSA-N	RYLHNOVXKPXDIP-UHFFFAOYSA-N	Completed	Organic compounds	Benzenoids	Benzene and substituted derivatives	N-phenylureas	N-acyl-phenylureas	N-benzoyl-N'-phenylureas
Fluoxastrobin	UFEODZBUAFNAEU-NLRVBDNBSA-N	UFEODZBUAFNAEU-NLRVBDNBSA-N	Completed	Organic compounds	Organic oxygen compounds	Organooxygen compounds	Ethers	Diarylethers
Fluquinconazole	IJJVMEJXYNJXOJ-UHFFFAOYSA-N	IJJVMEJXYNJXOJ-UHFFFAOYSA-N	Completed	Organic compounds	Organoheterocyclic compounds	Diazanaphthalenes	Benzodiazines	Quinazolines	Quinazolinamines
Flusilazole	FQKUGOMFVDPBIZ-UHFFFAOYSA-N	FQKUGOMFVDPBIZ-UHFFFAOYSA-N	Completed	Organic compounds	Benzenoids	Benzene and substituted derivatives	Halobenzenes	Fluorobenzenes
Flutolanil	PTCGDEVVHUXTMP-UHFFFAOYSA-N	PTCGDEVVHUXTMP-UHFFFAOYSA-N	Completed	Organic compounds	Benzenoids	Benzene and substituted derivatives	Anilides	Aromatic anilides	Benzanilides
Flutriafol	JWUCHKBSVLQQCO-UHFFFAOYSA-N	JWUCHKBSVLQQCO-UHFFFAOYSA-N	Completed	Organic compounds	Benzenoids	Benzene and substituted derivatives	Diphenylmethanes	Diphenylmethanes
Forchlorfenuron	GPXLRLUVLMHHIK-UHFFFAOYSA-N	GPXLRLUVLMHHIK-UHFFFAOYSA-N	Completed	Organic compounds	Organoheterocyclic compounds	Pyridines and derivatives	Halopyridines	2-halopyridines
Fuberidazole	UYJUZNLFJAWNEZ-UHFFFAOYSA-N	UYJUZNLFJAWNEZ-UHFFFAOYSA-N	Completed	Organic compounds	Organoheterocyclic compounds	Benzimidazoles		Benzimidazoles
Furalaxyl	CIEXPHRYOLIQQD-UHFFFAOYSA-N	CIEXPHRYOLIQQD-UHFFFAOYSA-N	Completed	Organic compounds	Benzenoids	Benzene and substituted derivatives	Anilides	Aromatic anilides	Furanilides	2-furanilides
Furathiocarb	HAWJXYBZNNRMNO-UHFFFAOYSA-N	HAWJXYBZNNRMNO-UHFFFAOYSA-N	Completed	Organic compounds	Organoheterocyclic compounds	Coumarans		Coumarans
Hexaconazole	STMIIPIFODONDC-UHFFFAOYSA-N	STMIIPIFODONDC-UHFFFAOYSA-N	Completed	Organic compounds	Benzenoids	Benzene and substituted derivatives	Halobenzenes	Chlorobenzenes	Dichlorobenzenes
Hexaflumuron	RGNPBRKPHBKNKX-UHFFFAOYSA-N	RGNPBRKPHBKNKX-UHFFFAOYSA-N	Completed	Organic compounds	Benzenoids	Benzene and substituted derivatives	N-phenylureas	N-acyl-phenylureas	N-benzoyl-N'-phenylureas
Hexythiazox	XGWIJUOSCAQSSV-XHDPSFHLSA-N	XGWIJUOSCAQSSV-XHDPSFHLSA-N	Completed	Organic compounds	Benzenoids	Benzene and substituted derivatives	Halobenzenes	Chlorobenzenes
Hydramethylnon	IQVNEKKDSLOHHK-FNCQTZNRSA-N	IQVNEKKDSLOHHK-FNCQTZNRSA-N	Completed	Organic compounds	Benzenoids	Benzene and substituted derivatives	Trifluoromethylbenzenes	Trifluoromethylbenzenes
Imidacloprid	YWTYJOPNNQFBPC-UHFFFAOYSA-N	YWTYJOPNNQFBPC-UHFFFAOYSA-N	Completed	Organic compounds	Organic nitrogen compounds	Organonitrogen compounds	Guanidines	Nitroguanidines
Indoxacarb	VBCVPMMZEGZULK-NRFANRHFSA-N	VBCVPMMZEGZULK-NRFANRHFSA-N	Completed	Organic compounds	Benzenoids	Benzene and substituted derivatives	Phenylcarbamic acid esters	Phenylcarbamic acid esters
Ipconazole	QTYCMDBMOLSEAM-UHFFFAOYSA-N	QTYCMDBMOLSEAM-UHFFFAOYSA-N	Completed	Organic compounds	Lipids and lipid-like molecules	Prenol lipids	Monoterpenoids	Iridoids and derivatives
Iprovalicarb	NWUWYYSKZYIQAE-WMCAAGNKSA-N	NWUWYYSKZYIQAE-WMCAAGNKSA-N	Completed	Organic compounds	Benzenoids	Benzene and substituted derivatives	Toluenes	Toluenes
Isoprocarb	QBSJMKIUCUGGNG-UHFFFAOYSA-N	QBSJMKIUCUGGNG-UHFFFAOYSA-N	Completed	Organic compounds	Benzenoids	Benzene and substituted derivatives	Cumenes	Cumenes
Isoproturon	PUIYMUZLKQOUOZ-UHFFFAOYSA-N	PUIYMUZLKQOUOZ-UHFFFAOYSA-N	Completed	Organic compounds	Benzenoids	Benzene and substituted derivatives	N-phenylureas	N-phenylureas
Kresoxim-methyl	ZOTBXTZVPHCKPN-HTXNQAPBSA-N	ZOTBXTZVPHCKPN-HTXNQAPBSA-N	Completed	Organic compounds	Benzenoids	Phenol ethers		Phenol ethers
Linuron	XKJMBINCVNINCA-UHFFFAOYSA-N	XKJMBINCVNINCA-UHFFFAOYSA-N	Completed	Organic compounds	Benzenoids	Benzene and substituted derivatives	N-phenylureas	N-phenylureas
Lufenuron	PWPJGUXAGUPAHP-UHFFFAOYSA-N	PWPJGUXAGUPAHP-UHFFFAOYSA-N	Completed	Organic compounds	Benzenoids	Benzene and substituted derivatives	N-phenylureas	N-phenylureas
Mandipropamid	KWLVWJPJKJMCSH-UHFFFAOYSA-N	KWLVWJPJKJMCSH-UHFFFAOYSA-N	Completed	Organic compounds	Benzenoids	Benzene and substituted derivatives	Benzylethers	Benzylethers
Mefenacet	XIGAUIHYSDTJHW-UHFFFAOYSA-N	XIGAUIHYSDTJHW-UHFFFAOYSA-N	Completed	Organic compounds	Organoheterocyclic compounds	Benzothiazoles		Benzothiazoles
Mepanipyrim	CIFWZNRJIBNXRE-UHFFFAOYSA-N	CIFWZNRJIBNXRE-UHFFFAOYSA-N	Completed	Organic compounds	Benzenoids	Benzene and substituted derivatives	Aniline and substituted anilines	Aniline and substituted anilines
Mepronil	BCTQJXQXJVLSIG-UHFFFAOYSA-N	BCTQJXQXJVLSIG-UHFFFAOYSA-N	Completed	Organic compounds	Benzenoids	Benzene and substituted derivatives	Anilides	Aromatic anilides	Benzanilides
Mesotrione	KPUREKXXPHOJQT-UHFFFAOYSA-N	KPUREKXXPHOJQT-UHFFFAOYSA-N	Completed	Organic compounds	Organic oxygen compounds	Organooxygen compounds	Carbonyl compounds	Ketones	Aryl ketones	Phenylketones
Metaflumizone	MIFOMMKAVSCNKQ-QNKGDIEWSA-N	MIFOMMKAVSCNKQ-QNKGDIEWSA-N	Completed	Organic compounds	Phenylpropanoids and polyketides	Stilbenes		Stilbenes			Alkyl-phenylketones	Benzoylcyclohexane-1,3-diones
Metalaxyl	ZQEIXNIJLIKNTD-UHFFFAOYSA-N	ZQEIXNIJLIKNTD-UHFFFAOYSA-N	Completed	Organic compounds	Organic acids and derivatives	Carboxylic acids and derivatives	Amino acids, peptides, and analogues	Amino acids and derivatives	Alpha amino acids and derivatives	Alpha amino acid esters
Metconazole	XWPZUHJBOLQNMN-UHFFFAOYSA-N	XWPZUHJBOLQNMN-UHFFFAOYSA-N	Completed	Organic compounds	Lipids and lipid-like molecules	Prenol lipids	Monoterpenoids	Iridoids and derivatives
Methabenzthiazuron	RRVIAQKBTUQODI-UHFFFAOYSA-N	RRVIAQKBTUQODI-UHFFFAOYSA-N	Completed	Organic compounds	Organoheterocyclic compounds	Benzothiazoles		Benzothiazoles
Methamidophos	NNKVPIKMPCQWCG-UHFFFAOYSA-N	NNKVPIKMPCQWCG-UHFFFAOYSA-N	Completed	Organic compounds	Organophosphorus compounds	Organothiophosphorus compounds	Phosphoramidothioic-acid-O,S-diesters	Phosphoramidothioic-acid-O,S-diesters
Methiocarb	YFBPRJGDJKVWAH-UHFFFAOYSA-N	YFBPRJGDJKVWAH-UHFFFAOYSA-N	Completed	Organic compounds	Benzenoids	Benzene and substituted derivatives	Phenoxy compounds	Phenoxy compounds
Methoprotryne	DDUIUBPJPOKOMV-UHFFFAOYSA-N	DDUIUBPJPOKOMV-UHFFFAOYSA-N	Completed	Organic compounds	Organoheterocyclic compounds	Triazines	1,3,5-triazines	Methylthio-s-triazines
Methoxyfenozide	QCAWEPFNJXQPAN-UHFFFAOYSA-N	QCAWEPFNJXQPAN-UHFFFAOYSA-N	Completed	Organic compounds	Benzenoids	Benzene and substituted derivatives	Benzoic acids and derivatives	Benzoic acids and derivatives
Metribuzin	FOXFZRUHNHCZPX-UHFFFAOYSA-N	FOXFZRUHNHCZPX-UHFFFAOYSA-N	Completed	Organic compounds	Organosulfur compounds	Thioethers	Aryl thioethers	Aryl thioethers
Mevinphos	GEPDYQSQVLXLEU-AATRIKPKSA-N	GEPDYQSQVLXLEU-AATRIKPKSA-N	Completed	Organic compounds	Lipids and lipid-like molecules	Fatty Acyls	Fatty acid esters	Fatty acid esters
Mexacarbate	YNEVBPNZHBAYOA-UHFFFAOYSA-N	YNEVBPNZHBAYOA-UHFFFAOYSA-N	Completed	Organic compounds	Benzenoids	Benzene and substituted derivatives	Phenyl methylcarbamates	Phenyl methylcarbamates
Monocrotophos	KRTSDMXIXPKRQR-AATRIKPKSA-N	KRTSDMXIXPKRQR-AATRIKPKSA-N	Completed	Organic compounds	Organic acids and derivatives	Organic phosphoric acids and derivatives	Phosphate esters	Alkyl phosphates	Dialkyl phosphates
Monolinuron	LKJPSUCKSLORMF-UHFFFAOYSA-N	LKJPSUCKSLORMF-UHFFFAOYSA-N	Completed	Organic compounds	Benzenoids	Benzene and substituted derivatives	N-phenylureas	N-phenylureas
Myclobutanil	HZJKXKUJVSEEFU-UHFFFAOYSA-N	HZJKXKUJVSEEFU-UHFFFAOYSA-N	Completed	Organic compounds	Benzenoids	Benzene and substituted derivatives	Halobenzenes	Chlorobenzenes
Neburon	CCGPUGMWYLICGL-UHFFFAOYSA-N	CCGPUGMWYLICGL-UHFFFAOYSA-N	Completed	Organic compounds	Benzenoids	Benzene and substituted derivatives	N-phenylureas	N-phenylureas
Nitenpyram	CFRPSFYHXJZSBI-DHZHZOJOSA-N	CFRPSFYHXJZSBI-DHZHZOJOSA-N	Completed	Organic compounds	Organoheterocyclic compounds	Pyridines and derivatives	Halopyridines	2-halopyridines
Novaluron	NJPPVKZQTLUDBO-UHFFFAOYSA-N	NJPPVKZQTLUDBO-UHFFFAOYSA-N	Completed	Organic compounds	Benzenoids	Phenol ethers		Phenol ethers
Nuarimol	SAPGTCDSBGMXCD-UHFFFAOYSA-N	SAPGTCDSBGMXCD-UHFFFAOYSA-N	Completed	Organic compounds	Benzenoids	Benzene and substituted derivatives	Diphenylmethanes	Diphenylmethanes
Oxadixyl	UWVQIROCRJWDKL-UHFFFAOYSA-N	UWVQIROCRJWDKL-UHFFFAOYSA-N	Completed	Organic compounds	Benzenoids	Benzene and substituted derivatives	Anilides	Anilides
Penconazole	WKBPZYKAUNRMKP-UHFFFAOYSA-N	WKBPZYKAUNRMKP-UHFFFAOYSA-N	Completed	Organic compounds	Benzenoids	Benzene and substituted derivatives	Halobenzenes	Chlorobenzenes	Dichlorobenzenes
Pencycuron	OGYFATSSENRIKG-UHFFFAOYSA-N	OGYFATSSENRIKG-UHFFFAOYSA-N	Completed	Organic compounds	Benzenoids	Benzene and substituted derivatives	Halobenzenes	Chlorobenzenes
Phenmedipham	IDOWTHOLJBTAFI-UHFFFAOYSA-N	IDOWTHOLJBTAFI-UHFFFAOYSA-N	Completed	Organic compounds	Benzenoids	Benzene and substituted derivatives	Phenylcarbamic acid esters	Phenylcarbamic acid esters
Picoxystrobin	IBSNKSODLGJUMQ-SDNWHVSQSA-N	IBSNKSODLGJUMQ-SDNWHVSQSA-N	Completed	Organic compounds	Benzenoids	Benzene and substituted derivatives	Phenyl-beta-methoxyacrylates	Phenyl-beta-methoxyacrylates
Pirimicarb	YFGYUFNIOHWBOB-UHFFFAOYSA-N	YFGYUFNIOHWBOB-UHFFFAOYSA-N	Completed	Organic compounds	Organic nitrogen compounds	Organonitrogen compounds	Amines	Tertiary amines	Tertiary alkylarylamines	Dialkylarylamines
Prochloraz	TVLSRXXIMLFWEO-UHFFFAOYSA-N	TVLSRXXIMLFWEO-UHFFFAOYSA-N	Completed	Organic compounds	Benzenoids	Phenol ethers		Phenol ethers
Promecarb	DTAPQAJKAFRNJB-UHFFFAOYSA-N	DTAPQAJKAFRNJB-UHFFFAOYSA-N	Completed	Organic compounds	Benzenoids	Benzene and substituted derivatives	Phenyl methylcarbamates	Phenyl methylcarbamates
Prometon	ISEUFVQQFVOBCY-UHFFFAOYSA-N	ISEUFVQQFVOBCY-UHFFFAOYSA-N	Completed	Organic compounds	Organoheterocyclic compounds	Triazines	1,3,5-triazines	Alkoxy-S-triazines	2-methoxy-1,3,5-triazines
Prometryne	AAEVYOVXGOFMJO-UHFFFAOYSA-N	AAEVYOVXGOFMJO-UHFFFAOYSA-N	Completed	Organic compounds	Organoheterocyclic compounds	Triazines	1,3,5-triazines	Methylthio-s-triazines
Propamocarb	WZZLDXDUQPOXNW-UHFFFAOYSA-N	WZZLDXDUQPOXNW-UHFFFAOYSA-N	Completed	Organic compounds	Organic acids and derivatives	Carboxylic acids and derivatives	Amino acids, peptides, and analogues	Amino acids and derivatives	Carbamic acids and derivatives	Carbamate esters
Propiconazole	STJLVHWMYQXCPB-UHFFFAOYSA-N	STJLVHWMYQXCPB-UHFFFAOYSA-N	Completed	Organic compounds	Benzenoids	Benzene and substituted derivatives	Halobenzenes	Chlorobenzenes	Dichlorobenzenes
Propoxur	ISRUGXGCCGIOQO-UHFFFAOYSA-N	ISRUGXGCCGIOQO-UHFFFAOYSA-N	Completed	Organic compounds	Benzenoids	Phenol ethers		Phenol ethers
Prothioconazole	MNHVNIJQQRJYDH-UHFFFAOYSA-N	MNHVNIJQQRJYDH-UHFFFAOYSA-N	Completed	Organic compounds	Benzenoids	Benzene and substituted derivatives	Halobenzenes	Chlorobenzenes
Pymetrozine	QHMTXANCGGJZRX-WUXMJOGZSA-N	QHMTXANCGGJZRX-WUXMJOGZSA-N	Completed	Organic compounds	Organoheterocyclic compounds	Triazines	1,2,4-triazines	1,2,4-triazines
Pyracarbolid	YPCALTGLHFLNGA-UHFFFAOYSA-N	YPCALTGLHFLNGA-UHFFFAOYSA-N	Completed	Organic compounds	Benzenoids	Benzene and substituted derivatives	Anilides	Anilides
Pyraclostrobin	HZRSNVGNWUDEFX-UHFFFAOYSA-N	HZRSNVGNWUDEFX-UHFFFAOYSA-N	Completed	Organic compounds	Organoheterocyclic compounds	Azoles	Pyrazoles	Phenylpyrazoles
Pyridaben	DWFZBUWUXWZWKD-UHFFFAOYSA-N	DWFZBUWUXWZWKD-UHFFFAOYSA-N	Completed	Organic compounds	Benzenoids	Benzene and substituted derivatives	Phenylpropanes	Phenylpropanes
Pyrimethanil	ZLIBICFPKPWGIZ-UHFFFAOYSA-N	ZLIBICFPKPWGIZ-UHFFFAOYSA-N	Completed	Organic compounds	Benzenoids	Benzene and substituted derivatives	Aniline and substituted anilines	Aniline and substituted anilines
Pyriproxyfen	NHDHVHZZCFYRSB-UHFFFAOYSA-N	NHDHVHZZCFYRSB-UHFFFAOYSA-N	Completed	Organic compounds	Benzenoids	Benzene and substituted derivatives	Diphenylethers	Diphenylethers
Quinoxyfen	WRPIRSINYZBGPK-UHFFFAOYSA-N	WRPIRSINYZBGPK-UHFFFAOYSA-N	Completed	Organic compounds	Organic oxygen compounds	Organooxygen compounds	Ethers	Diarylethers
Rotenone	JUVIOZPCNVVQFO-HBGVWJBISA-N	JUVIOZPCNVVQFO-HBGVWJBISA-N	Completed	Organic compounds	Phenylpropanoids and polyketides	Isoflavonoids	Rotenoids	Rotenones
Secbumeton	ZJMZZNVGNSWOOM-UHFFFAOYSA-N	ZJMZZNVGNSWOOM-UHFFFAOYSA-N	Completed	Organic compounds	Organoheterocyclic compounds	Triazines	1,3,5-triazines	Alkoxy-S-triazines	2-methoxy-1,3,5-triazines
Simetryn	MGLWZSOBALDPEK-UHFFFAOYSA-N	MGLWZSOBALDPEK-UHFFFAOYSA-N	Completed	Organic compounds	Organoheterocyclic compounds	Triazines	1,3,5-triazines	Methylthio-s-triazines
Spirodiclofen	DTDSAWVUFPGDMX-UHFFFAOYSA-N	DTDSAWVUFPGDMX-UHFFFAOYSA-N	Completed	Organic compounds	Benzenoids	Benzene and substituted derivatives	Halobenzenes	Chlorobenzenes	Dichlorobenzenes
Spirotetramat	CLSVJBIHYWPGQY-UHFFFAOYSA-N	CLSVJBIHYWPGQY-UHFFFAOYSA-N	Completed	Organic compounds	Benzenoids	Benzene and substituted derivatives	Xylenes	p-Xylenes
Spiroxamine	PUYXTUJWRLOUCW-UHFFFAOYSA-N	PUYXTUJWRLOUCW-UHFFFAOYSA-N	Completed	Organic compounds	Organic oxygen compounds	Organooxygen compounds	Ethers	Acetals	Ketals
Sulfentrazone	OORLZFUTLGXMEF-UHFFFAOYSA-N	OORLZFUTLGXMEF-UHFFFAOYSA-N	Completed	Organic compounds	Organoheterocyclic compounds	Azoles	Triazoles	Phenyltriazoles	Phenyl-1,2,4-triazoles
Tebuconazole	PXMNMQRDXWABCY-UHFFFAOYSA-N	PXMNMQRDXWABCY-UHFFFAOYSA-N	Completed	Organic compounds	Benzenoids	Benzene and substituted derivatives	Phenylbutylamines	Phenylbutylamines
Tebufenpyrad	ZZYSLNWGKKDOML-UHFFFAOYSA-N	ZZYSLNWGKKDOML-UHFFFAOYSA-N	Completed	Organic compounds	Benzenoids	Benzene and substituted derivatives	Phenylpropanes	Phenylpropanes
Tebuthiuron	HBPDKDSFLXWOAE-UHFFFAOYSA-N	HBPDKDSFLXWOAE-UHFFFAOYSA-N	Completed	Organic compounds	Organoheterocyclic compounds	Azoles	Thiadiazoles	Aminothiadiazoles	2-amino-1,3,4-thiadiazoles	1,3,4-thiadiazol-2-ylureas
Teflubenzuron	CJDWRQLODFKPEL-UHFFFAOYSA-N	CJDWRQLODFKPEL-UHFFFAOYSA-N	Completed	Organic compounds	Benzenoids	Benzene and substituted derivatives	Halobenzenes	Chlorobenzenes	Dichlorobenzenes
Temephos	WWJZWCUNLNYYAU-UHFFFAOYSA-N	WWJZWCUNLNYYAU-UHFFFAOYSA-N	Completed	Organic compounds	Organic acids and derivatives	Organic thiophosphoric acids and derivatives	Thiophosphoric acid esters	Aryl thiophosphates	Phenyl thiophosphates
Terbumeton	BCQMBFHBDZVHKU-UHFFFAOYSA-N	BCQMBFHBDZVHKU-UHFFFAOYSA-N	Completed	Organic compounds	Organoheterocyclic compounds	Triazines	Aminotriazines	1,3,5-triazine-2,4-diamines
Terbutryne	IROINLKCQGIITA-UHFFFAOYSA-N	IROINLKCQGIITA-UHFFFAOYSA-N	Completed	Organic compounds	Organoheterocyclic compounds	Triazines	1,3,5-triazines	Methylthio-s-triazines
Tetraconazole	LQDARGUHUSPFNL-UHFFFAOYSA-N	LQDARGUHUSPFNL-UHFFFAOYSA-N	Completed	Organic compounds	Benzenoids	Benzene and substituted derivatives	Halobenzenes	Chlorobenzenes	Dichlorobenzenes
Thiabendazole	WJCNZQLZVWNLKY-UHFFFAOYSA-N	WJCNZQLZVWNLKY-UHFFFAOYSA-N	Completed	Organic compounds	Organoheterocyclic compounds	Benzimidazoles		Benzimidazoles
Thiacloprid	HOKKPVIRMVDYPB-UHFFFAOYSA-N	HOKKPVIRMVDYPB-UHFFFAOYSA-N	Completed	Organic compounds	Organoheterocyclic compounds	Pyridines and derivatives	Halopyridines	2-halopyridines
Thiamethoxam	NWWZPOKUUAIXIW-DHZHZOJOSA-N	NWWZPOKUUAIXIW-DHZHZOJOSA-N	Completed	Organic compounds	Organoheterocyclic compounds	Azoles	Thiazoles	2,5-disubstituted thiazoles
Thidiazuron	HFCYZXMHUIHAQI-UHFFFAOYSA-N	HFCYZXMHUIHAQI-UHFFFAOYSA-N	Completed	Organic compounds	Benzenoids	Benzene and substituted derivatives	N-phenylureas	N-phenylureas
Thiobencarb	QHTQREMOGMZHJV-UHFFFAOYSA-N	QHTQREMOGMZHJV-UHFFFAOYSA-N	Completed	Organic compounds	Benzenoids	Benzene and substituted derivatives	Halobenzenes	Chlorobenzenes
Thiophanate-methyl	QGHREAKMXXNCOA-UHFFFAOYSA-N	QGHREAKMXXNCOA-UHFFFAOYSA-N	Completed	Organic compounds	Benzenoids	Benzene and substituted derivatives		Benzene and substituted derivatives
Triadimefon	WURBVZBTWMNKQT-UHFFFAOYSA-N	WURBVZBTWMNKQT-UHFFFAOYSA-N	Completed	Organic compounds	Benzenoids	Phenol ethers		Phenol ethers
Triadimenol	BAZVSMNPJJMILC-UHFFFAOYSA-N	BAZVSMNPJJMILC-UHFFFAOYSA-N	Completed	Organic compounds	Benzenoids	Phenol ethers		Phenol ethers
Tricyclazole	DQJCHOQLCLEDLL-UHFFFAOYSA-N	DQJCHOQLCLEDLL-UHFFFAOYSA-N	Completed	Organic compounds	Organoheterocyclic compounds	Benzotriazoles	Triazolobenzothiazoles	Triazolobenzothiazoles
Trifloxystrobin	ONCZDRURRATYFI-TVJDWZFNSA-N	ONCZDRURRATYFI-TVJDWZFNSA-N	Completed	Organic compounds	Benzenoids	Benzene and substituted derivatives	Trifluoromethylbenzenes	Trifluoromethylbenzenes
Triflumizole	HSMVPDGQOIQYSR-UHFFFAOYSA-N	HSMVPDGQOIQYSR-UHFFFAOYSA-N	Completed	Organic compounds	Benzenoids	Benzene and substituted derivatives	Trifluoromethylbenzenes	Trifluoromethylbenzenes
Triflumuron	XAIPTRIXGHTTNT-UHFFFAOYSA-N	XAIPTRIXGHTTNT-UHFFFAOYSA-N	Completed	Organic compounds	Benzenoids	Benzene and substituted derivatives	N-phenylureas	N-acyl-phenylureas	N-benzoyl-N'-phenylureas
Triticonazole	PPDBOQMNKNNODG-NTEUORMPSA-N	PPDBOQMNKNNODG-NTEUORMPSA-N	Completed	Organic compounds	Benzenoids	Benzene and substituted derivatives	Halobenzenes	Chlorobenzenes
Zoxamide	SOUGWDPPRBKJEX-UHFFFAOYSA-N	SOUGWDPPRBKJEX-UHFFFAOYSA-N	Completed	Organic compounds	Benzenoids	Benzene and substituted derivatives	Halobenzenes	Chlorobenzenes	Dichlorobenzenes
2,3-Methylenedioxyamphetamine	XOOVOZRNDZPGLF-UHFFFAOYSA-N	XOOVOZRNDZPGLF-UHFFFAOYSA-N	Completed	Organic compounds	Organoheterocyclic compounds	Benzodioxoles		Benzodioxoles
(+)-Methadone	USSIQXCVUWKGNF-KRWDZBQOSA-N	USSIQXCVUWKGNF-KRWDZBQOSA-N	Completed	Organic compounds	Benzenoids	Benzene and substituted derivatives	Diphenylmethanes	Diphenylmethanes
(+-)-Propanolol	AQHHHDLHHXJYJD-UHFFFAOYSA-N	AQHHHDLHHXJYJD-UHFFFAOYSA-N	Completed	Organic compounds	Benzenoids	Naphthalenes		Naphthalenes
4-Fluoroamphetamine	DGXWNDGLEOIEGT-UHFFFAOYSA-N	DGXWNDGLEOIEGT-UHFFFAOYSA-N	Completed	Organic compounds	Benzenoids	Benzene and substituted derivatives	Phenethylamines	Amphetamines and derivatives
4-Hydroxynirvanol	LZFIVJCLUUNXKT-UHFFFAOYSA-N	LZFIVJCLUUNXKT-UHFFFAOYSA-N	Completed	Organic compounds	Organoheterocyclic compounds	Azolidines	Imidazolidines	Imidazolidinones	Imidazolidinediones	Hydantoins
Acebutolol	GOEMGAFJFRBGGG-UHFFFAOYSA-N	GOEMGAFJFRBGGG-UHFFFAOYSA-N	Completed	Organic compounds	Organic oxygen compounds	Organooxygen compounds	Carbonyl compounds	Ketones	Aryl ketones	Phenylketones
Acetaminophen	RZVAJINKPMORJF-UHFFFAOYSA-N	RZVAJINKPMORJF-UHFFFAOYSA-N	Completed	Organic compounds	Benzenoids	Phenols	1-hydroxy-2-unsubstituted benzenoids	1-hydroxy-2-unsubstituted benzenoids			Alkyl-phenylketones
Acetamiprid	WCXDHFDTOYPNIE-UHFFFAOYSA-N	WCXDHFDTOYPNIE-UHFFFAOYSA-N	Completed	Organic compounds	Organoheterocyclic compounds	Pyridines and derivatives	Halopyridines	2-halopyridines
Acyclovir	MKUXAQIIEYXACX-UHFFFAOYSA-N	MKUXAQIIEYXACX-UHFFFAOYSA-N	Completed	Organic compounds	Organoheterocyclic compounds	Imidazopyrimidines	Purines and purine derivatives	Purinones	Hypoxanthines
Adenine	GFFGJBXGBJISGV-UHFFFAOYSA-N	GFFGJBXGBJISGV-UHFFFAOYSA-N	Completed	Organic compounds	Organoheterocyclic compounds	Imidazopyrimidines	Purines and purine derivatives	6-aminopurines
Alanine	QNAYBMKLOCPYGJ-UHFFFAOYSA-N	QNAYBMKLOCPYGJ-UHFFFAOYSA-N	Completed	Organic compounds	Organic acids and derivatives	Carboxylic acids and derivatives	Amino acids, peptides, and analogues	Amino acids and derivatives	Alpha amino acids and derivatives	Alanine and derivatives
Alprazolam	VREFGVBLTWBCJP-UHFFFAOYSA-N	VREFGVBLTWBCJP-UHFFFAOYSA-N	Completed	Organic compounds	Organoheterocyclic compounds	Benzodiazepines	1,4-benzodiazepines	1,2,4-triazolo[4,3-a][1,4]benzodiazepines
Amitriptyline	KRMDCWKBEZIMAB-UHFFFAOYSA-N	KRMDCWKBEZIMAB-UHFFFAOYSA-N	Completed	Organic compounds	Benzenoids	Dibenzocycloheptenes		Dibenzocycloheptenes
Amphetamine	KWTSXDURSIMDCE-UHFFFAOYSA-N	KWTSXDURSIMDCE-UHFFFAOYSA-N	Completed	Organic compounds	Benzenoids	Benzene and substituted derivatives	Phenethylamines	Amphetamines and derivatives
Aspartic Acid	CKLJMWTZIZZHCS-REOHCLBHSA-N	CKLJMWTZIZZHCS-REOHCLBHSA-N	Completed	Organic compounds	Organic acids and derivatives	Carboxylic acids and derivatives	Amino acids, peptides, and analogues	Amino acids and derivatives	Alpha amino acids and derivatives	Aspartic acid and derivatives
Atenolol	METKIMKYRPQLGS-UHFFFAOYSA-N	METKIMKYRPQLGS-UHFFFAOYSA-N	Completed	Organic compounds	Benzenoids	Benzene and substituted derivatives	Phenylacetamides	Phenylacetamides
Benzoylecgonine	GVGYEFKIHJTNQZ-RFQIPJPRSA-N	GVGYEFKIHJTNQZ-RFQIPJPRSA-N	Completed	Organic compounds	Benzenoids	Benzene and substituted derivatives	Benzoic acids and derivatives	Benzoic acid esters
Betaine	KWIUHFFTVRNATP-UHFFFAOYSA-N	KWIUHFFTVRNATP-UHFFFAOYSA-N	Completed	Organic compounds	Organic acids and derivatives	Carboxylic acids and derivatives	Amino acids, peptides, and analogues	Amino acids and derivatives	Alpha amino acids and derivatives	Alpha amino acids
Bufuralol	SSEBTPPFLLCUMN-UHFFFAOYSA-N	SSEBTPPFLLCUMN-UHFFFAOYSA-N	Completed	Organic compounds	Organoheterocyclic compounds	Benzofurans		Benzofurans
Buprenorphine	RMRJXGBAOAMLHD-IHFGGWKQSA-N	RMRJXGBAOAMLHD-IHFGGWKQSA-N	Completed	Organic compounds	Benzenoids	Phenanthrenes and derivatives		Phenanthrenes and derivatives
Buscopan	HOZOZZFCZRXYEK-HNHWXVNLSA-M	HOZOZZFCZRXYEK-HNHWXVNLSA-M	Completed	Organic compounds	Organic acids and derivatives	Hydroxy acids and derivatives	Beta hydroxy acids and derivatives	Beta hydroxy acids and derivatives
Buspirone	QWCRAEMEVRGPNT-UHFFFAOYSA-N	QWCRAEMEVRGPNT-UHFFFAOYSA-N	Completed	Organic compounds	Organoheterocyclic compounds	Diazinanes	Piperazines	N-arylpiperazines
Caffeine	RYYVLZVUVIJVGH-UHFFFAOYSA-N	RYYVLZVUVIJVGH-UHFFFAOYSA-N	Completed	Organic compounds	Organoheterocyclic compounds	Imidazopyrimidines	Purines and purine derivatives	Xanthines
Carbamazepine	FFGPTBGBLSHEPO-UHFFFAOYSA-N	FFGPTBGBLSHEPO-UHFFFAOYSA-N	Completed	Organic compounds	Organoheterocyclic compounds	Benzazepines	Dibenzazepines	Dibenzazepines
Carisoprodol	OFZCIYFFPZCNJE-UHFFFAOYSA-N	OFZCIYFFPZCNJE-UHFFFAOYSA-N	Completed	Organic compounds	Organic acids and derivatives	Carboxylic acids and derivatives	Amino acids, peptides, and analogues	Amino acids and derivatives	Carbamic acids and derivatives	Carbamate esters
Chloramphenicol	WIIZWVCIJKGZOK-RKDXNWHRSA-N	WIIZWVCIJKGZOK-RKDXNWHRSA-N	Completed	Organic compounds	Benzenoids	Benzene and substituted derivatives	Nitrobenzenes	Nitrobenzenes
Chlordiazepoxide	BUCORZSTKDOEKQ-UHFFFAOYSA-N	BUCORZSTKDOEKQ-UHFFFAOYSA-N	Completed	Organic compounds	Organoheterocyclic compounds	Benzodiazepines	1,4-benzodiazepines	1,4-benzodiazepines
Chlorpheniramine	SOYKEARSMXGVTM-UHFFFAOYSA-N	SOYKEARSMXGVTM-UHFFFAOYSA-N	Completed	Organic compounds	Organoheterocyclic compounds	Pyridines and derivatives	Pheniramines	Pheniramines
Chlorprothixene	WSPOMRSOLSGNFJ-AUWJEWJLSA-N	WSPOMRSOLSGNFJ-AUWJEWJLSA-N	Completed	Organic compounds	Organoheterocyclic compounds	Benzothiopyrans	1-benzothiopyrans	Thioxanthenes
Chlorthalidone	JIVPVXMEBJLZRO-UHFFFAOYSA-N	JIVPVXMEBJLZRO-UHFFFAOYSA-N	Completed	Organic compounds	Organoheterocyclic compounds	Isoindoles and derivatives	Isoindolines	Isoindolones
Choline	OEYIOHPDSNJKLS-UHFFFAOYSA-N	OEYIOHPDSNJKLS-UHFFFAOYSA-N	Completed	Organic compounds	Organic nitrogen compounds	Organonitrogen compounds	Quaternary ammonium salts	Cholines
Cimetidine	AQIXAKUUQRKLND-UHFFFAOYSA-N	AQIXAKUUQRKLND-UHFFFAOYSA-N	Completed	Organic compounds	Organoheterocyclic compounds	Azoles	Imidazoles	Imidazoles
Clenbuterol	STJMRWALKKWQGH-UHFFFAOYSA-N	STJMRWALKKWQGH-UHFFFAOYSA-N	Completed	Organic compounds	Benzenoids	Benzene and substituted derivatives	Halobenzenes	Chlorobenzenes	Dichlorobenzenes
Clonazepam	DGBIGWXXNGSACT-UHFFFAOYSA-N	DGBIGWXXNGSACT-UHFFFAOYSA-N	Completed	Organic compounds	Organoheterocyclic compounds	Benzodiazepines	1,4-benzodiazepines	1,4-benzodiazepines
Clonidine	GJSURZIOUXUGAL-UHFFFAOYSA-N	GJSURZIOUXUGAL-UHFFFAOYSA-N	Completed	Organic compounds	Benzenoids	Benzene and substituted derivatives	Halobenzenes	Chlorobenzenes	Dichlorobenzenes
Cocaine	ZPUCINDJVBIVPJ-LJISPDSOSA-N	ZPUCINDJVBIVPJ-LJISPDSOSA-N	Completed	Organic compounds	Benzenoids	Benzene and substituted derivatives	Benzoic acids and derivatives	Benzoic acid esters
Cotinine	UIKROCXWUNQSPJ-VIFPVBQESA-N	UIKROCXWUNQSPJ-VIFPVBQESA-N	Completed	Organic compounds	Organoheterocyclic compounds	Pyridines and derivatives	Pyrrolidinylpyridines	Pyrrolidinylpyridines
Cyromazine	LVQDKIWDGQRHTE-UHFFFAOYSA-N	LVQDKIWDGQRHTE-UHFFFAOYSA-N	Completed	Organic compounds	Organoheterocyclic compounds	Triazines	Aminotriazines	N-aliphatic s-triazines
Cytidine	UHDGCWIWMRVCDJ-XVFCMESISA-N	UHDGCWIWMRVCDJ-XVFCMESISA-N	Completed	Organic compounds	Nucleosides, nucleotides, and analogues	Pyrimidine nucleosides		Pyrimidine nucleosides
Desalkylflurazepam	MVAUDJDXZPBWOW-UHFFFAOYSA-N	MVAUDJDXZPBWOW-UHFFFAOYSA-N	Completed	Organic compounds	Organoheterocyclic compounds	Benzodiazepines	1,4-benzodiazepines	1,4-benzodiazepines
Desipramine	HCYAFALTSJYZDH-UHFFFAOYSA-N	HCYAFALTSJYZDH-UHFFFAOYSA-N	Completed	Organic compounds	Organoheterocyclic compounds	Benzazepines	Dibenzazepines	Dibenzazepines
Desomorphine	LNNWVNGFPYWNQE-GMIGKAJZSA-N	LNNWVNGFPYWNQE-GMIGKAJZSA-N	Completed	Organic compounds	Alkaloids and derivatives	Morphinans		Morphinans
Desoxypipradrol	RWTNXJXZVGHMGI-UHFFFAOYSA-N	RWTNXJXZVGHMGI-UHFFFAOYSA-N	Completed	Organic compounds	Benzenoids	Benzene and substituted derivatives	Diphenylmethanes	Diphenylmethanes
Diazepam	AAOVKJBEBIDNHE-UHFFFAOYSA-N	AAOVKJBEBIDNHE-UHFFFAOYSA-N	Completed	Organic compounds	Organoheterocyclic compounds	Benzodiazepines	1,4-benzodiazepines	1,4-benzodiazepines
Dihydrocodeine	RBOXVHNMENFORY-DNJOTXNNSA-N	RBOXVHNMENFORY-DNJOTXNNSA-N	Completed	Organic compounds	Alkaloids and derivatives	Morphinans		Morphinans
Dimetridazole	IBXPYPUJPLLOIN-UHFFFAOYSA-N	IBXPYPUJPLLOIN-UHFFFAOYSA-N	Completed	Organic compounds	Organoheterocyclic compounds	Azoles	Imidazoles	Substituted imidazoles	Nitroimidazoles
Diphenhydramine	ZZVUWRFHKOJYTH-UHFFFAOYSA-N	ZZVUWRFHKOJYTH-UHFFFAOYSA-N	Completed	Organic compounds	Benzenoids	Benzene and substituted derivatives	Diphenylmethanes	Diphenylmethanes
D-Pantothenic acid	GHOKWGTUZJEAQD-ZETCQYMHSA-N	GHOKWGTUZJEAQD-ZETCQYMHSA-N	Completed	Organic compounds	Organic oxygen compounds	Organooxygen compounds	Alcohols and polyols	Secondary alcohols
Ephedrine	KWGRBVOPPLSCSI-WPRPVWTQSA-N	KWGRBVOPPLSCSI-WPRPVWTQSA-N	Completed	Organic compounds	Benzenoids	Benzene and substituted derivatives	Phenylpropanes	Phenylpropanes
Epitestosterone	MUMGGOZAMZWBJJ-KZYORJDKSA-N	MUMGGOZAMZWBJJ-KZYORJDKSA-N	Completed	Organic compounds	Lipids and lipid-like molecules	Steroids and steroid derivatives	Androstane steroids	Androgens and derivatives
Ethylone	MJEMIOXXNCZZFK-UHFFFAOYSA-N	MJEMIOXXNCZZFK-UHFFFAOYSA-N	Completed	Organic compounds	Organoheterocyclic compounds	Benzodioxoles		Benzodioxoles
Fenoterol	LSLYOANBFKQKPT-UHFFFAOYSA-N	LSLYOANBFKQKPT-UHFFFAOYSA-N	Completed	Organic compounds	Benzenoids	Benzene and substituted derivatives	Phenethylamines	Amphetamines and derivatives
Fentanyl	PJMPHNIQZUBGLI-UHFFFAOYSA-N	PJMPHNIQZUBGLI-UHFFFAOYSA-N	Completed	Organic compounds	Organoheterocyclic compounds	Piperidines	Fentanyls	Fentanyls
Fluoxetine	RTHCYVBBDHJXIQ-UHFFFAOYSA-N	RTHCYVBBDHJXIQ-UHFFFAOYSA-N	Completed	Organic compounds	Benzenoids	Benzene and substituted derivatives	Trifluoromethylbenzenes	Trifluoromethylbenzenes
Fluvoxamine	CJOFXWAVKWHTFT-XSFVSMFZSA-N	CJOFXWAVKWHTFT-XSFVSMFZSA-N	Completed	Organic compounds	Benzenoids	Benzene and substituted derivatives	Trifluoromethylbenzenes	Trifluoromethylbenzenes
Gabapentin	UGJMXCAKCUNAIE-UHFFFAOYSA-N	UGJMXCAKCUNAIE-UHFFFAOYSA-N	Completed	Organic compounds	Organic acids and derivatives	Carboxylic acids and derivatives	Amino acids, peptides, and analogues	Amino acids and derivatives	Gamma amino acids and derivatives
Guanine	UYTPUPDQBNUYGX-UHFFFAOYSA-N	UYTPUPDQBNUYGX-UHFFFAOYSA-N	Completed	Organic compounds	Organoheterocyclic compounds	Imidazopyrimidines	Purines and purine derivatives	Purines and purine derivatives
Guanosine	NYHBQMYGNKIUIF-UUOKFMHZSA-N	NYHBQMYGNKIUIF-UUOKFMHZSA-N	Completed	Organic compounds	Nucleosides, nucleotides, and analogues	Purine nucleosides		Purine nucleosides
Haloperidol	LNEPOXFFQSENCJ-UHFFFAOYSA-N	LNEPOXFFQSENCJ-UHFFFAOYSA-N	Completed	Organic compounds	Organic oxygen compounds	Organooxygen compounds	Carbonyl compounds	Ketones	Aryl ketones	Phenylketones
Histamine	NTYJJOPFIAHURM-UHFFFAOYSA-N	NTYJJOPFIAHURM-UHFFFAOYSA-N	Completed	Organic compounds	Organic nitrogen compounds	Organonitrogen compounds	Amines	Primary amines	2-arylethylamines		Alkyl-phenylketones
Hydrocodone	LLPOLZWFYMWNKH-CMKMFDCUSA-N	LLPOLZWFYMWNKH-CMKMFDCUSA-N	Completed	Organic compounds	Alkaloids and derivatives	Morphinans		Morphinans
Imipramine	BCGWQEUPMDMJNV-UHFFFAOYSA-N	BCGWQEUPMDMJNV-UHFFFAOYSA-N	Completed	Organic compounds	Organoheterocyclic compounds	Benzazepines	Dibenzazepines	Dibenzazepines
Indoprofen	RJMIEHBSYVWVIN-UHFFFAOYSA-N	RJMIEHBSYVWVIN-UHFFFAOYSA-N	Completed	Organic compounds	Phenylpropanoids and polyketides	Phenylpropanoic acids		Phenylpropanoic acids
Ketamine	YQEZLKZALYSWHR-UHFFFAOYSA-N	YQEZLKZALYSWHR-UHFFFAOYSA-N	Completed	Organic compounds	Benzenoids	Benzene and substituted derivatives	Halobenzenes	Chlorobenzenes
Ketoprofen	DKYWVDODHFEZIM-UHFFFAOYSA-N	DKYWVDODHFEZIM-UHFFFAOYSA-N	Completed	Organic compounds	Benzenoids	Benzene and substituted derivatives	Benzophenones	Benzophenones
Ketorolac	OZWKMVRBQXNZKK-UHFFFAOYSA-N	OZWKMVRBQXNZKK-UHFFFAOYSA-N	Completed	Organic compounds	Organic oxygen compounds	Organooxygen compounds	Carbonyl compounds	Ketones	Aryl ketones	Phenylketones
Lacosamide	VPPJLAIAVCUEMN-GFCCVEGCSA-N	VPPJLAIAVCUEMN-GFCCVEGCSA-N	Completed	Organic compounds	Organic acids and derivatives	Carboxylic acids and derivatives	Amino acids, peptides, and analogues	Amino acids and derivatives	Alpha amino acids and derivatives	N-acyl-alpha amino acids and derivatives	Aryl-phenylketones
Lamotrigine	PYZRQGJRPPTADH-UHFFFAOYSA-N	PYZRQGJRPPTADH-UHFFFAOYSA-N	Completed	Organic compounds	Benzenoids	Benzene and substituted derivatives	Halobenzenes	Chlorobenzenes	Dichlorobenzenes
L-arginine	ODKSFYDXXFIFQN-BYPYZUCNSA-N	ODKSFYDXXFIFQN-BYPYZUCNSA-N	Completed	Organic compounds	Organic acids and derivatives	Carboxylic acids and derivatives	Amino acids, peptides, and analogues	Amino acids and derivatives	Alpha amino acids and derivatives	Alpha amino acids
L-asparagine	DCXYFEDJOCDNAF-REOHCLBHSA-N	DCXYFEDJOCDNAF-REOHCLBHSA-N	Completed	Organic compounds	Organic acids and derivatives	Carboxylic acids and derivatives	Amino acids, peptides, and analogues	Amino acids and derivatives	Alpha amino acids and derivatives	Asparagine and derivatives	L-alpha-amino acids
L-glutamic acid	WHUUTDBJXJRKMK-VKHMYHEASA-N	WHUUTDBJXJRKMK-VKHMYHEASA-N	Completed	Organic compounds	Organic acids and derivatives	Carboxylic acids and derivatives	Amino acids, peptides, and analogues	Amino acids and derivatives	Alpha amino acids and derivatives	Glutamic acid and derivatives
L-Glycine	DHMQDGOQFOQNFH-UHFFFAOYSA-N	DHMQDGOQFOQNFH-UHFFFAOYSA-N	Completed	Organic compounds	Organic acids and derivatives	Carboxylic acids and derivatives	Amino acids, peptides, and analogues	Amino acids and derivatives	Alpha amino acids and derivatives	Alpha amino acids
L-histidine	HNDVDQJCIGZPNO-YFKPBYRVSA-N	HNDVDQJCIGZPNO-YFKPBYRVSA-N	Completed	Organic compounds	Organic acids and derivatives	Carboxylic acids and derivatives	Amino acids, peptides, and analogues	Amino acids and derivatives	Alpha amino acids and derivatives	Histidine and derivatives
Lidocaine	NNJVILVZKWQKPM-UHFFFAOYSA-N	NNJVILVZKWQKPM-UHFFFAOYSA-N	Completed	Organic compounds	Benzenoids	Benzene and substituted derivatives	Xylenes	m-Xylenes
L-Isoleucine	AGPKZVBTJJNPAG-WHFBIAKZSA-N	AGPKZVBTJJNPAG-WHFBIAKZSA-N	Completed	Organic compounds	Organic acids and derivatives	Carboxylic acids and derivatives	Amino acids, peptides, and analogues	Amino acids and derivatives	Alpha amino acids and derivatives	Isoleucine and derivatives
L-leucine	ROHFNLRQFUQHCH-YFKPBYRVSA-N	ROHFNLRQFUQHCH-YFKPBYRVSA-N	Completed	Organic compounds	Organic acids and derivatives	Carboxylic acids and derivatives	Amino acids, peptides, and analogues	Amino acids and derivatives	Alpha amino acids and derivatives	Leucine and derivatives
L-lysine	KDXKERNSBIXSRK-YFKPBYRVSA-N	KDXKERNSBIXSRK-YFKPBYRVSA-N	Completed	Organic compounds	Organic acids and derivatives	Carboxylic acids and derivatives	Amino acids, peptides, and analogues	Amino acids and derivatives	Alpha amino acids and derivatives	Alpha amino acids
L-methionine	FFEARJCKVFRZRR-BYPYZUCNSA-N	FFEARJCKVFRZRR-BYPYZUCNSA-N	Completed	Organic compounds	Organic acids and derivatives	Carboxylic acids and derivatives	Amino acids, peptides, and analogues	Amino acids and derivatives	Alpha amino acids and derivatives	Methionine and derivatives	L-alpha-amino acids
Lovastatin	PCZOHLXUXFIOCF-BXMDZJJMSA-N	PCZOHLXUXFIOCF-BXMDZJJMSA-N	Completed	Organic compounds	Organoheterocyclic compounds	Lactones	Delta valerolactones	Delta valerolactones
L-phenylalanine	COLNVLDHVKWLRT-QMMMGPOBSA-N	COLNVLDHVKWLRT-QMMMGPOBSA-N	Completed	Organic compounds	Organic acids and derivatives	Carboxylic acids and derivatives	Amino acids, peptides, and analogues	Amino acids and derivatives	Alpha amino acids and derivatives	Phenylalanine and derivatives
L-proline	ONIBWKKTOPOVIA-BYPYZUCNSA-N	ONIBWKKTOPOVIA-BYPYZUCNSA-N	Completed	Organic compounds	Organic acids and derivatives	Carboxylic acids and derivatives	Amino acids, peptides, and analogues	Amino acids and derivatives	Alpha amino acids and derivatives	Proline and derivatives
L-serine	MTCFGRXMJLQNBG-REOHCLBHSA-N	MTCFGRXMJLQNBG-REOHCLBHSA-N	Completed	Organic compounds	Organic acids and derivatives	Carboxylic acids and derivatives	Amino acids, peptides, and analogues	Amino acids and derivatives	Alpha amino acids and derivatives	Serine and derivatives
L-threonine	AYFVYJQAPQTCCC-GBXIJSLDSA-N	AYFVYJQAPQTCCC-GBXIJSLDSA-N	Completed	Organic compounds	Organic acids and derivatives	Carboxylic acids and derivatives	Amino acids, peptides, and analogues	Amino acids and derivatives	Alpha amino acids and derivatives	Alpha amino acids
L-Tyrosine	OUYCCCASQSFEME-QMMMGPOBSA-N	OUYCCCASQSFEME-QMMMGPOBSA-N	Completed	Organic compounds	Organic acids and derivatives	Carboxylic acids and derivatives	Amino acids, peptides, and analogues	Amino acids and derivatives	Alpha amino acids and derivatives	Tyrosine and derivatives	L-alpha-amino acids
L-Valine	KZSNJWFQEVHDMF-BYPYZUCNSA-N	KZSNJWFQEVHDMF-BYPYZUCNSA-N	Completed	Organic compounds	Organic acids and derivatives	Carboxylic acids and derivatives	Amino acids, peptides, and analogues	Amino acids and derivatives	Alpha amino acids and derivatives	Valine and derivatives
Malic Acid	BJEPYKJPYRNKOW-UHFFFAOYSA-N	BJEPYKJPYRNKOW-UHFFFAOYSA-N	Completed	Organic compounds	Organic acids and derivatives	Hydroxy acids and derivatives	Beta hydroxy acids and derivatives	Beta hydroxy acids and derivatives
Maprotiline	QSLMDECMDJKHMQ-UHFFFAOYSA-N	QSLMDECMDJKHMQ-UHFFFAOYSA-N	Completed	Organic compounds	Benzenoids	Anthracenes		Anthracenes
Melamine	JDSHMPZPIAZGSV-UHFFFAOYSA-N	JDSHMPZPIAZGSV-UHFFFAOYSA-N	Completed	Organic compounds	Organoheterocyclic compounds	Triazines	1,3,5-triazines	1,3,5-triazines
Melatonin	DRLFMBDRBRZALE-UHFFFAOYSA-N	DRLFMBDRBRZALE-UHFFFAOYSA-N	Completed	Organic compounds	Organoheterocyclic compounds	Indoles and derivatives	Indoles	3-alkylindoles
Meprobamate	NPPQSCRMBWNHMW-UHFFFAOYSA-N	NPPQSCRMBWNHMW-UHFFFAOYSA-N	Completed	Organic compounds	Organic acids and derivatives	Carboxylic acids and derivatives	Amino acids, peptides, and analogues	Amino acids and derivatives	Carbamic acids and derivatives	Carbamate esters
Methamphetamine	MYWUZJCMWCOHBA-VIFPVBQESA-N	MYWUZJCMWCOHBA-VIFPVBQESA-N	Completed	Organic compounds	Benzenoids	Benzene and substituted derivatives	Phenethylamines	Amphetamines and derivatives
Methylhistamine	PHSPJQZRQAJPPF-UHFFFAOYSA-N	PHSPJQZRQAJPPF-UHFFFAOYSA-N	Completed	Organic compounds	Organic nitrogen compounds	Organonitrogen compounds	Amines	Aralkylamines
Metoprolol	IUBSYMUCCVWXPE-UHFFFAOYSA-N	IUBSYMUCCVWXPE-UHFFFAOYSA-N	Completed	Organic compounds	Benzenoids	Phenols	Tyrosols and derivatives	Tyrosols and derivatives
monoxidil	ZIMGGGWCDYVHOY-UHFFFAOYSA-N	ZIMGGGWCDYVHOY-UHFFFAOYSA-N	Completed	Organic compounds	Organic nitrogen compounds	Organonitrogen compounds	Amines	Tertiary amines	Tertiary alkylarylamines	Dialkylarylamines
Monuron	BMLIZLVNXIYGCK-UHFFFAOYSA-N	BMLIZLVNXIYGCK-UHFFFAOYSA-N	Completed	Organic compounds	Benzenoids	Benzene and substituted derivatives	N-phenylureas	N-phenylureas
Morphine	BQJCRHHNABKAKU-KBQPJGBKSA-N	BQJCRHHNABKAKU-KBQPJGBKSA-N	Completed	Organic compounds	Alkaloids and derivatives	Morphinans		Morphinans
Naproxen	CMWTZPSULFXXJA-VIFPVBQESA-N	CMWTZPSULFXXJA-VIFPVBQESA-N	Completed	Organic compounds	Benzenoids	Naphthalenes		Naphthalenes
Niacinamide (Nicotinamide)	DFPAKSUCGFBDDF-UHFFFAOYSA-N	DFPAKSUCGFBDDF-UHFFFAOYSA-N	Completed	Organic compounds	Organoheterocyclic compounds	Pyridines and derivatives	Pyridinecarboxylic acids and derivatives	Pyridinecarboxamides	Nicotinamides
Nicotinic acid (Niacin)	PVNIIMVLHYAWGP-UHFFFAOYSA-N	PVNIIMVLHYAWGP-UHFFFAOYSA-N	Completed	Organic compounds	Organoheterocyclic compounds	Pyridines and derivatives	Pyridinecarboxylic acids and derivatives	Pyridinecarboxylic acids
Nifenazone	BRZANEXCSZCZCI-UHFFFAOYSA-N	BRZANEXCSZCZCI-UHFFFAOYSA-N	Completed	Organic compounds	Organoheterocyclic compounds	Azoles	Pyrazoles	Phenylpyrazoles
Nitrazepam	KJONHKAYOJNZEC-UHFFFAOYSA-N	KJONHKAYOJNZEC-UHFFFAOYSA-N	Completed	Organic compounds	Organoheterocyclic compounds	Benzodiazepines	1,4-benzodiazepines	1,4-benzodiazepines
N-methylephedrine	FMCGSUUBYTWNDP-UHFFFAOYSA-N	FMCGSUUBYTWNDP-UHFFFAOYSA-N	Completed	Organic compounds	Benzenoids	Benzene and substituted derivatives	Phenylpropanes	Phenylpropanes
Norepinephrine	SFLSHLFXELFNJZ-QMMMGPOBSA-N	SFLSHLFXELFNJZ-QMMMGPOBSA-N	Completed	Organic compounds	Benzenoids	Phenols	Benzenediols	Catechols
Norfentanyl	PMCBDBWCQQBSRJ-UHFFFAOYSA-N	PMCBDBWCQQBSRJ-UHFFFAOYSA-N	Completed	Organic compounds	Benzenoids	Benzene and substituted derivatives	Anilides	Anilides
Normeperidine	QKHMFBKXTNQCTM-UHFFFAOYSA-N	QKHMFBKXTNQCTM-UHFFFAOYSA-N	Completed	Organic compounds	Organoheterocyclic compounds	Piperidines	Phenylpiperidines	Phenylpiperidines
Nortriptyline	PHVGLTMQBUFIQQ-UHFFFAOYSA-N	PHVGLTMQBUFIQQ-UHFFFAOYSA-N	Completed	Organic compounds	Benzenoids	Dibenzocycloheptenes		Dibenzocycloheptenes
O-Desmethyl-cis-tramadol HCL	UWJUQVWARXYRCG-UHFFFAOYSA-N	UWJUQVWARXYRCG-UHFFFAOYSA-N	Completed	Organic compounds	Benzenoids	Benzene and substituted derivatives	Cyclohexylphenols	Cyclohexylphenols
Oxazepam	ADIMAYPTOBDMTL-UHFFFAOYSA-N	ADIMAYPTOBDMTL-UHFFFAOYSA-N	Completed	Organic compounds	Organoheterocyclic compounds	Benzodiazepines	1,4-benzodiazepines	1,4-benzodiazepines
Oxymorphone	UQCNKQCJZOAFTQ-ISWURRPUSA-N	UQCNKQCJZOAFTQ-ISWURRPUSA-N	Completed	Organic compounds	Benzenoids	Phenanthrenes and derivatives		Phenanthrenes and derivatives
Pamaquine	QTQWMSOQOSJFBV-UHFFFAOYSA-N	QTQWMSOQOSJFBV-UHFFFAOYSA-N	Completed	Organic compounds	Organoheterocyclic compounds	Quinolines and derivatives	Aminoquinolines and derivatives	Aminoquinolines and derivatives
Pentedrone	WLIWIUNEJRETFX-UHFFFAOYSA-N	WLIWIUNEJRETFX-UHFFFAOYSA-N	Completed	Organic compounds	Organic oxygen compounds	Organooxygen compounds	Carbonyl compounds	Ketones	Aryl ketones	Phenylketones
Perphenazine	RGCVKNLCSQQDEP-UHFFFAOYSA-N	RGCVKNLCSQQDEP-UHFFFAOYSA-N	Completed	Organic compounds	Organoheterocyclic compounds	Benzothiazines	Phenothiazines	Phenothiazines			Alkyl-phenylketones
Phenacetin	CPJSUEIXXCENMM-UHFFFAOYSA-N	CPJSUEIXXCENMM-UHFFFAOYSA-N	Completed	Organic compounds	Benzenoids	Benzene and substituted derivatives	Anilides	Acetanilides
Pheniramine	IJHNSHDBIRRJRN-UHFFFAOYSA-N	IJHNSHDBIRRJRN-UHFFFAOYSA-N	Completed	Organic compounds	Organoheterocyclic compounds	Pyridines and derivatives	Pheniramines	Pheniramines
phenyltoloxamine	IZRPKIZLIFYYKR-UHFFFAOYSA-N	IZRPKIZLIFYYKR-UHFFFAOYSA-N	Completed	Organic compounds	Benzenoids	Benzene and substituted derivatives	Diphenylmethanes	Diphenylmethanes
Progesterone	RJKFOVLPORLFTN-LEKSSAKUSA-N	RJKFOVLPORLFTN-LEKSSAKUSA-N	Completed	Organic compounds	Lipids and lipid-like molecules	Steroids and steroid derivatives	Pregnane steroids	Gluco/mineralocorticoids, progestogins and derivatives
Propafenone	JWHAUXFOSRPERK-UHFFFAOYSA-N	JWHAUXFOSRPERK-UHFFFAOYSA-N	Completed	Organic compounds	Phenylpropanoids and polyketides	Linear 1,3-diarylpropanoids		Linear 1,3-diarylpropanoids
Protriptyline	BWPIARFWQZKAIA-UHFFFAOYSA-N	BWPIARFWQZKAIA-UHFFFAOYSA-N	Completed	Organic compounds	Benzenoids	Dibenzocycloheptenes		Dibenzocycloheptenes
Pseudoephedrine	KWGRBVOPPLSCSI-WCBMZHEXSA-N	KWGRBVOPPLSCSI-WCBMZHEXSA-N	Completed	Organic compounds	Benzenoids	Benzene and substituted derivatives	Phenylpropanes	Phenylpropanes
Pyridoxal	RADKZDMFGJYCBB-UHFFFAOYSA-N	RADKZDMFGJYCBB-UHFFFAOYSA-N	Completed	Organic compounds	Organoheterocyclic compounds	Pyridines and derivatives	Pyridine carboxaldehydes	Pyridoxals and derivatives
Quinidine	LOUPRKONTZGTKE-LHHVKLHASA-N	LOUPRKONTZGTKE-LHHVKLHASA-N	Completed	Organic compounds	Alkaloids and derivatives	Cinchona alkaloids		Cinchona alkaloids
R-(-)-Nirvanol	UDTWZFJEMMUFLC-LLVKDONJSA-N	UDTWZFJEMMUFLC-LLVKDONJSA-N	Completed	Organic compounds	Organoheterocyclic compounds	Azolidines	Imidazolidines	Imidazolidinones	Imidazolidinediones	Hydantoins
Ractopamine	YJQZYXCXBBCEAQ-UHFFFAOYSA-N	YJQZYXCXBBCEAQ-UHFFFAOYSA-N	Completed	Organic compounds	Benzenoids	Phenols	1-hydroxy-2-unsubstituted benzenoids	1-hydroxy-2-unsubstituted benzenoids			Phenylhydantoins
ranitidine	VMXUWOKSQNHOCA-UKTHLTGXSA-N	VMXUWOKSQNHOCA-UKTHLTGXSA-N	Completed	Organic compounds	Organic nitrogen compounds	Organonitrogen compounds	Amines	Aralkylamines
Retigabine	PCOBBVZJEWWZFR-UHFFFAOYSA-N	PCOBBVZJEWWZFR-UHFFFAOYSA-N	Completed	Organic compounds	Benzenoids	Benzene and substituted derivatives	Phenylmethylamines	Phenylbenzamines
Ritalinic Acid	INGSNVSERUZOAK-UHFFFAOYSA-N	INGSNVSERUZOAK-UHFFFAOYSA-N	Completed	Organic compounds	Organic nitrogen compounds	Organonitrogen compounds	Amines	Aralkylamines
S-(+)-Ibuprofen	HEFNNWSXXWATRW-JTQLQIEISA-N	HEFNNWSXXWATRW-JTQLQIEISA-N	Completed	Organic compounds	Phenylpropanoids and polyketides	Phenylpropanoic acids		Phenylpropanoic acids
Salbutamol	NDAUXUAQIAJITI-UHFFFAOYSA-N	NDAUXUAQIAJITI-UHFFFAOYSA-N	Completed	Organic compounds	Benzenoids	Benzene and substituted derivatives	Benzyl alcohols	Benzyl alcohols
Salicylic Acid	YGSDEFSMJLZEOE-UHFFFAOYSA-N	YGSDEFSMJLZEOE-UHFFFAOYSA-N	Completed	Organic compounds	Benzenoids	Benzene and substituted derivatives	Benzoic acids and derivatives	Hydroxybenzoic acid derivatives	Salicylic acid and derivatives	Salicylic acids
Sarcosine	FSYKKLYZXJSNPZ-UHFFFAOYSA-N	FSYKKLYZXJSNPZ-UHFFFAOYSA-N	Completed	Organic compounds	Organic acids and derivatives	Carboxylic acids and derivatives	Amino acids, peptides, and analogues	Amino acids and derivatives	Alpha amino acids and derivatives	Alpha amino acids
Selegiline	MEZLKOACVSPNER-GFCCVEGCSA-N	MEZLKOACVSPNER-GFCCVEGCSA-N	Completed	Organic compounds	Benzenoids	Benzene and substituted derivatives	Phenethylamines	Amphetamines and derivatives
Sulfadiazine	SEEPANYCNGTZFQ-UHFFFAOYSA-N	SEEPANYCNGTZFQ-UHFFFAOYSA-N	Completed	Organic compounds	Benzenoids	Benzene and substituted derivatives	Benzenesulfonamides	Aminobenzenesulfonamides
Sulfamerazine	QPPBRPIAZZHUNT-UHFFFAOYSA-N	QPPBRPIAZZHUNT-UHFFFAOYSA-N	Completed	Organic compounds	Benzenoids	Benzene and substituted derivatives	Benzenesulfonamides	Aminobenzenesulfonamides
Sulfamethazine (Sulfadimidine)	ASWVTGNCAZCNNR-UHFFFAOYSA-N	ASWVTGNCAZCNNR-UHFFFAOYSA-N	Completed	Organic compounds	Benzenoids	Benzene and substituted derivatives	Benzenesulfonamides	Aminobenzenesulfonamides
Sulpiride	BGRJTUBHPOOWDU-UHFFFAOYSA-N	BGRJTUBHPOOWDU-UHFFFAOYSA-N	Completed	Organic compounds	Benzenoids	Benzene and substituted derivatives	Benzenesulfonamides	Benzenesulfonamides
Tapentadol	KWTWDQCKEHXFFR-SMDDNHRTSA-N	KWTWDQCKEHXFFR-SMDDNHRTSA-N	Completed	Organic compounds	Benzenoids	Benzene and substituted derivatives	Phenylpropanes	Phenylpropanes
Temazepam	SEQDDYPDSLOBDC-UHFFFAOYSA-N	SEQDDYPDSLOBDC-UHFFFAOYSA-N	Completed	Organic compounds	Organoheterocyclic compounds	Benzodiazepines	1,4-benzodiazepines	1,4-benzodiazepines
Terbutaline	XWTYSIMOBUGWOL-UHFFFAOYSA-N	XWTYSIMOBUGWOL-UHFFFAOYSA-N	Completed	Organic compounds	Benzenoids	Phenols	Benzenediols	Resorcinols
Testosterone	MUMGGOZAMZWBJJ-DYKIIFRCSA-N	MUMGGOZAMZWBJJ-DYKIIFRCSA-N	Completed	Organic compounds	Lipids and lipid-like molecules	Steroids and steroid derivatives	Androstane steroids	Androgens and derivatives
Thymine	RWQNBRDOKXIBIV-UHFFFAOYSA-N	RWQNBRDOKXIBIV-UHFFFAOYSA-N	Completed	Organic compounds	Organoheterocyclic compounds	Diazines	Pyrimidines and pyrimidine derivatives	Hydroxypyrimidines
Tolbutamide	JLRGJRBPOGGCBT-UHFFFAOYSA-N	JLRGJRBPOGGCBT-UHFFFAOYSA-N	Completed	Organic compounds	Benzenoids	Benzene and substituted derivatives	Benzenesulfonamides	Benzenesulfonamides
Tramadol	TVYLLZQTGLZFBW-ZBFHGGJFSA-N	TVYLLZQTGLZFBW-ZBFHGGJFSA-N	Completed	Organic compounds	Benzenoids	Phenol ethers	Anisoles	Anisoles
Trimethoprim	IEDVJHCEMCRBQM-UHFFFAOYSA-N	IEDVJHCEMCRBQM-UHFFFAOYSA-N	Completed	Organic compounds	Benzenoids	Phenol ethers	Anisoles	Anisoles
Trimipramine	ZSCDBOWYZJWBIY-UHFFFAOYSA-N	ZSCDBOWYZJWBIY-UHFFFAOYSA-N	Completed	Organic compounds	Organoheterocyclic compounds	Benzazepines	Dibenzazepines	Dibenzazepines
Uracil	ISAKRJDGNUQOIC-UHFFFAOYSA-N	ISAKRJDGNUQOIC-UHFFFAOYSA-N	Completed	Organic compounds	Organoheterocyclic compounds	Diazines	Pyrimidines and pyrimidine derivatives	Pyrimidones
Uridine	DRTQHJPVMGBUCF-XVFCMESISA-N	DRTQHJPVMGBUCF-XVFCMESISA-N	Completed	Organic compounds	Nucleosides, nucleotides, and analogues	Pyrimidine nucleosides		Pyrimidine nucleosides
Vamidothion	LESVOLZBIFDZGS-UHFFFAOYSA-N	LESVOLZBIFDZGS-UHFFFAOYSA-N	Completed	Organic compounds	Organic acids and derivatives	Carboxylic acids and derivatives	Carboxylic acid derivatives	Carboxylic acid amides	Secondary carboxylic acid amides
Venlafaxein	PNVNVHUZROJLTJ-UHFFFAOYSA-N	PNVNVHUZROJLTJ-UHFFFAOYSA-N	Completed	Organic compounds	Benzenoids	Phenol ethers	Anisoles	Anisoles
Verapamil	SGTNSNPWRIOYBX-UHFFFAOYSA-N	SGTNSNPWRIOYBX-UHFFFAOYSA-N	Completed	Organic compounds	Benzenoids	Benzene and substituted derivatives	Phenylbutylamines	Phenylbutylamines
Vigabatrin	PJDFLNIOAUIZSL-UHFFFAOYSA-N	PJDFLNIOAUIZSL-UHFFFAOYSA-N	Completed	Organic compounds	Organic acids and derivatives	Carboxylic acids and derivatives	Amino acids, peptides, and analogues	Amino acids and derivatives	Gamma amino acids and derivatives
Warfarin	PJVWKTKQMONHTI-UHFFFAOYSA-N	PJVWKTKQMONHTI-UHFFFAOYSA-N	Completed	Organic compounds	Phenylpropanoids and polyketides	Coumarins and derivatives	Hydroxycoumarins	4-hydroxycoumarins
Xanthine	LRFVTYWOQMYALW-UHFFFAOYSA-N	LRFVTYWOQMYALW-UHFFFAOYSA-N	Completed	Organic compounds	Organoheterocyclic compounds	Imidazopyrimidines	Purines and purine derivatives	Xanthines
Zolpidem	ZAFYATHCZYHLPB-UHFFFAOYSA-N	ZAFYATHCZYHLPB-UHFFFAOYSA-N	Completed	Organic compounds	Organoheterocyclic compounds	Azoles	Imidazoles	Substituted imidazoles	Phenylimidazoles
4-Aminobutyric acid (GABA)	BTCSSZJGUNDROE-UHFFFAOYSA-N	BTCSSZJGUNDROE-UHFFFAOYSA-N	Completed	Organic compounds	Organic acids and derivatives	Carboxylic acids and derivatives	Amino acids, peptides, and analogues	Amino acids and derivatives	Gamma amino acids and derivatives
(+)-Propoxyphene	XLMALTXPSGQGBX-GCJKJVERSA-N	XLMALTXPSGQGBX-GCJKJVERSA-N	Completed	Organic compounds	Phenylpropanoids and polyketides	Stilbenes		Stilbenes
Bendroflumethiazide	HDWIHXWEUNVBIY-UHFFFAOYSA-N	HDWIHXWEUNVBIY-UHFFFAOYSA-N	Completed	Organic compounds	Organoheterocyclic compounds	Thiadiazines	Benzothiadiazines	1,2,4-benzothiadiazine-1,1-dioxides
Etodolac	NNYBQONXHNTVIJ-UHFFFAOYSA-N	NNYBQONXHNTVIJ-UHFFFAOYSA-N	Completed	Organic compounds	Organoheterocyclic compounds	Indoles and derivatives	Indolyl carboxylic acids and derivatives	Indolyl carboxylic acids and derivatives
Ketoconazole	XMAYWYJOQHXEEK-OZXSUGGESA-N	XMAYWYJOQHXEEK-OZXSUGGESA-N	Completed	Organic compounds	Organoheterocyclic compounds	Diazinanes	Piperazines	Phenylpiperazines
L-glutamine	ZDXPYRJPNDTMRX-VKHMYHEASA-N	ZDXPYRJPNDTMRX-VKHMYHEASA-N	Completed	Organic compounds	Organic acids and derivatives	Carboxylic acids and derivatives	Amino acids, peptides, and analogues	Amino acids and derivatives	Alpha amino acids and derivatives	Alpha amino acids
Loperamide	RDOIQAHITMMDAJ-UHFFFAOYSA-N	RDOIQAHITMMDAJ-UHFFFAOYSA-N	Completed	Organic compounds	Benzenoids	Benzene and substituted derivatives	Diphenylmethanes	Diphenylmethanes			L-alpha-amino acids
L-tryptophan	QIVBCDIJIAJPQS-VIFPVBQESA-N	QIVBCDIJIAJPQS-VIFPVBQESA-N	Completed	Organic compounds	Organoheterocyclic compounds	Indoles and derivatives	Indolyl carboxylic acids and derivatives	Indolyl carboxylic acids and derivatives
Midazolam	DDLIGBOFAVUZHB-UHFFFAOYSA-N	DDLIGBOFAVUZHB-UHFFFAOYSA-N	Completed	Organic compounds	Organoheterocyclic compounds	Benzodiazepines	1,4-benzodiazepines	Imidazo[1,5-a][1,4]benzodiazepines
Naloxone	UZHSEJADLWPNLE-GRGSLBFTSA-N	UZHSEJADLWPNLE-GRGSLBFTSA-N	Completed	Organic compounds	Benzenoids	Phenanthrenes and derivatives		Phenanthrenes and derivatives
Norbuprenorphine	YOYLLRBMGQRFTN-IOMBULRVSA-N	YOYLLRBMGQRFTN-IOMBULRVSA-N	Completed	Organic compounds	Benzenoids	Phenanthrenes and derivatives		Phenanthrenes and derivatives
Norcodeine	HKOIXWVRNLGFOR-KOFBORESSA-N	HKOIXWVRNLGFOR-KOFBORESSA-N	Completed	Organic compounds	Alkaloids and derivatives	Morphinans		Morphinans
Noroxycodone	RIKMCJUNPCRFMW-ISWURRPUSA-N	RIKMCJUNPCRFMW-ISWURRPUSA-N	Completed	Organic compounds	Benzenoids	Phenanthrenes and derivatives		Phenanthrenes and derivatives
Norsertraline	SRPXSILJHWNFMK-ZBEGNZNMSA-N	SRPXSILJHWNFMK-ZBEGNZNMSA-N	Completed	Organic compounds	Benzenoids	Tetralins		Tetralins
Prazosin	IENZQIKPVFGBNW-UHFFFAOYSA-N	IENZQIKPVFGBNW-UHFFFAOYSA-N	Completed	Organic compounds	Organoheterocyclic compounds	Diazinanes	Piperazines	N-arylpiperazines
Prednisolone	OIGNJSKKLXVSLS-VWUMJDOOSA-N	OIGNJSKKLXVSLS-VWUMJDOOSA-N	Completed	Organic compounds	Lipids and lipid-like molecules	Steroids and steroid derivatives	Hydroxysteroids	21-hydroxysteroids
Safranin O	OARRHUQTFTUEOS-UHFFFAOYSA-N	OARRHUQTFTUEOS-UHFFFAOYSA-N	Completed	Organic compounds	Organoheterocyclic compounds	Diazanaphthalenes	Benzodiazines	Quinoxalines	Phenazines and derivatives
Sotalol	ZBMZVLHSJCTVON-UHFFFAOYSA-N	ZBMZVLHSJCTVON-UHFFFAOYSA-N	Completed	Organic compounds	Benzenoids	Benzene and substituted derivatives	Sulfanilides	Sulfanilides
Tamoxifen	NKANXQFJJICGDU-QPLCGJKRSA-N	NKANXQFJJICGDU-QPLCGJKRSA-N	Completed	Organic compounds	Phenylpropanoids and polyketides	Stilbenes		Stilbenes
Taurocholic Acid	WBWWGRHZICKQGZ-HZAMXZRMSA-N	WBWWGRHZICKQGZ-HZAMXZRMSA-N	Completed	Organic compounds	Lipids and lipid-like molecules	Steroids and steroid derivatives	Bile acids, alcohols and derivatives	Hydroxy bile acids, alcohols and derivatives	Trihydroxy bile acids, alcohols and derivatives
Terfenadine	GUGOEEXESWIERI-UHFFFAOYSA-N	GUGOEEXESWIERI-UHFFFAOYSA-N	Completed	Organic compounds	Benzenoids	Benzene and substituted derivatives	Diphenylmethanes	Diphenylmethanes
Urapidil	ICMGLRUYEQNHPF-UHFFFAOYSA-N	ICMGLRUYEQNHPF-UHFFFAOYSA-N	Completed	Organic compounds	Organoheterocyclic compounds	Diazinanes	Piperazines	Phenylpiperazines
5-Cl-MQOH	OPQODOXIDNYMKA-UHFFFAOYSA-N	OPQODOXIDNYMKA-UHFFFAOYSA-N	Completed	Organic compounds	Organoheterocyclic compounds	Quinolines and derivatives	Haloquinolines	Chloroquinolines
5-CN-MQOH	NWUAFVKGPOBCOA-UHFFFAOYSA-N	NWUAFVKGPOBCOA-UHFFFAOYSA-N	Completed	Organic compounds	Organoheterocyclic compounds	Quinolines and derivatives	Hydroxyquinolines	Hydroxyquinolines
5-F-MQOH	YMDMCOFPYPOKJD-UHFFFAOYSA-N	YMDMCOFPYPOKJD-UHFFFAOYSA-N	Completed	Organic compounds	Organoheterocyclic compounds	Quinolines and derivatives	Haloquinolines	Haloquinolines
5-Me-MQOH	GQUFSGXAEOXQJC-UHFFFAOYSA-N	GQUFSGXAEOXQJC-UHFFFAOYSA-N	Completed	Organic compounds	Organoheterocyclic compounds	Quinolines and derivatives	8-hydroxyquinolines	8-hydroxyquinolines
5-NO2-MQOH	XYPACLZTPMHPLB-UHFFFAOYSA-N	XYPACLZTPMHPLB-UHFFFAOYSA-N	Completed	Organic compounds	Organoheterocyclic compounds	Quinolines and derivatives	Nitroquinolines and derivatives	Nitroquinolines and derivatives
5-OMe-MQOH	ZOUCJKGSXDLPFZ-UHFFFAOYSA-N	ZOUCJKGSXDLPFZ-UHFFFAOYSA-N	Completed	Organic compounds	Organoheterocyclic compounds	Quinolines and derivatives	8-hydroxyquinolines	8-hydroxyquinolines
6-amino-2-MQ	TYJFYUVDUUACKX-UHFFFAOYSA-N	TYJFYUVDUUACKX-UHFFFAOYSA-N	Completed	Organic compounds	Organoheterocyclic compounds	Quinolines and derivatives	Aminoquinolines and derivatives	Aminoquinolines and derivatives
6-Cl-MQOH	DAWWEGRLXLVJHI-UHFFFAOYSA-N	DAWWEGRLXLVJHI-UHFFFAOYSA-N	Completed	Organic compounds	Organoheterocyclic compounds	Quinolines and derivatives	Haloquinolines	Chloroquinolines
6-CN-MQOH	BFCIHSRDPWBYJW-UHFFFAOYSA-N	BFCIHSRDPWBYJW-UHFFFAOYSA-N	Completed	Organic compounds	Organoheterocyclic compounds	Quinolines and derivatives	Hydroxyquinolines	Hydroxyquinolines
6-F-MQOH	HFLQAZUNFSXRSR-UHFFFAOYSA-N	HFLQAZUNFSXRSR-UHFFFAOYSA-N	Completed	Organic compounds	Organoheterocyclic compounds	Quinolines and derivatives	Haloquinolines	Haloquinolines
6-Me-MQOH	SQSBURBTMYAEBQ-UHFFFAOYSA-N	SQSBURBTMYAEBQ-UHFFFAOYSA-N	Completed	Organic compounds	Organoheterocyclic compounds	Quinolines and derivatives	8-hydroxyquinolines	8-hydroxyquinolines
6-methoxy-2-MQ	NAGJQQFMJKMXJQ-UHFFFAOYSA-N	NAGJQQFMJKMXJQ-UHFFFAOYSA-N	Completed	Organic compounds	Organoheterocyclic compounds	Quinolines and derivatives		Quinolines and derivatives
6-methyl-2-MQ	JJPSZKIOGBRMHK-UHFFFAOYSA-N	JJPSZKIOGBRMHK-UHFFFAOYSA-N	Completed	Organic compounds	Organoheterocyclic compounds	Quinolines and derivatives		Quinolines and derivatives
6-nitro-2-MQ	DXDPHHQJZWWAEH-UHFFFAOYSA-N	DXDPHHQJZWWAEH-UHFFFAOYSA-N	Completed	Organic compounds	Organoheterocyclic compounds	Quinolines and derivatives	Nitroquinolines and derivatives	Nitroquinolines and derivatives
6-NO2-MQOH	VUZFQYDNVUBSBS-UHFFFAOYSA-N	VUZFQYDNVUBSBS-UHFFFAOYSA-N	Completed	Organic compounds	Organoheterocyclic compounds	Quinolines and derivatives	Nitroquinolines and derivatives	Nitroquinolines and derivatives
6-OMe-MQOH	ZOUCJKGSXDLPFZ-UHFFFAOYSA-N	ZOUCJKGSXDLPFZ-UHFFFAOYSA-N	Completed	Organic compounds	Organoheterocyclic compounds	Quinolines and derivatives	8-hydroxyquinolines	8-hydroxyquinolines
7-chloro-2-MQ	WQZQFYRSYLXBGP-UHFFFAOYSA-N	WQZQFYRSYLXBGP-UHFFFAOYSA-N	Completed	Organic compounds	Organoheterocyclic compounds	Quinolines and derivatives	Haloquinolines	Chloroquinolines
7-Cl-MQOH	QLHYQTWFNLIXMZ-UHFFFAOYSA-N	QLHYQTWFNLIXMZ-UHFFFAOYSA-N	Completed	Organic compounds	Organoheterocyclic compounds	Quinolines and derivatives	Haloquinolines	Chloroquinolines
7-CN-MQOH	BFCIHSRDPWBYJW-UHFFFAOYSA-N	BFCIHSRDPWBYJW-UHFFFAOYSA-N	Completed	Organic compounds	Organoheterocyclic compounds	Quinolines and derivatives	Hydroxyquinolines	Hydroxyquinolines
7-F-MQOH	DMEJUWFIFSHHNF-UHFFFAOYSA-N	DMEJUWFIFSHHNF-UHFFFAOYSA-N	Completed	Organic compounds	Organoheterocyclic compounds	Quinolines and derivatives	Haloquinolines	Haloquinolines
7-Me-MQOH	KLCMWUIXAJXKTQ-UHFFFAOYSA-N	KLCMWUIXAJXKTQ-UHFFFAOYSA-N	Completed	Organic compounds	Organoheterocyclic compounds	Quinolines and derivatives	8-hydroxyquinolines	8-hydroxyquinolines
7-NO2-MQOH	RPGLTRHHWBHDLV-UHFFFAOYSA-N	RPGLTRHHWBHDLV-UHFFFAOYSA-N	Completed	Organic compounds	Organoheterocyclic compounds	Quinolines and derivatives	Nitroquinolines and derivatives	Nitroquinolines and derivatives
7-OMe-MQOH	USAQDQYASICRCI-UHFFFAOYSA-N	USAQDQYASICRCI-UHFFFAOYSA-N	Completed	Organic compounds	Organoheterocyclic compounds	Quinolines and derivatives	8-hydroxyquinolines	8-hydroxyquinolines
8-amino-2-MQ	JHIAOWGCGNMQKA-UHFFFAOYSA-N	JHIAOWGCGNMQKA-UHFFFAOYSA-N	Completed	Organic compounds	Organoheterocyclic compounds	Quinolines and derivatives	Aminoquinolines and derivatives	Aminoquinolines and derivatives
8-chloro-2-MQ	VVLYDFPOGMTMFJ-UHFFFAOYSA-N	VVLYDFPOGMTMFJ-UHFFFAOYSA-N	Completed	Organic compounds	Organoheterocyclic compounds	Quinolines and derivatives	Haloquinolines	Chloroquinolines
8-methoxy-2-MQ	OQXVXPBDSJQYRR-UHFFFAOYSA-N	OQXVXPBDSJQYRR-UHFFFAOYSA-N	Completed	Organic compounds	Organoheterocyclic compounds	Quinolines and derivatives		Quinolines and derivatives
8-methyl-2-MQ	BELFSAVWJLQIBB-UHFFFAOYSA-N	BELFSAVWJLQIBB-UHFFFAOYSA-N	Completed	Organic compounds	Organoheterocyclic compounds	Quinolines and derivatives		Quinolines and derivatives
8-nitro-2-MQ	UHPGVDHXHDPYQP-UHFFFAOYSA-N	UHPGVDHXHDPYQP-UHFFFAOYSA-N	Completed	Organic compounds	Organoheterocyclic compounds	Quinolines and derivatives		Quinolines and derivatives
A1a	VWBBCQGGNWUHDR-UHFFFAOYSA-N	VWBBCQGGNWUHDR-UHFFFAOYSA-N	Completed	Organic compounds	Benzenoids	Benzene and substituted derivatives	N-phenylureas	N-phenylureas
A1b	IOJFAOOESHEWSE-UHFFFAOYSA-N	IOJFAOOESHEWSE-UHFFFAOYSA-N	Completed	Organic compounds	Benzenoids	Benzene and substituted derivatives	N-phenylureas	N-phenylureas
A2a	NRNMAGOVURXQAE-UHFFFAOYSA-N	NRNMAGOVURXQAE-UHFFFAOYSA-N	Completed	Organic compounds	Benzenoids	Benzene and substituted derivatives	N-phenylureas	N-phenylureas
A2b	NJDNPPDDOKMOCI-UHFFFAOYSA-N	NJDNPPDDOKMOCI-UHFFFAOYSA-N	Completed	Organic compounds	Benzenoids	Benzene and substituted derivatives	N-phenylureas	N-phenylureas
A3a	WAMAMGLRPFVEBR-OQLLNIDSSA-N	WAMAMGLRPFVEBR-OQLLNIDSSA-N	Completed	Organic compounds	Organoheterocyclic compounds	Pyridines and derivatives		Pyridines and derivatives
A3b	WAMAMGLRPFVEBR-OQLLNIDSSA-N	WAMAMGLRPFVEBR-OQLLNIDSSA-N	Completed	Organic compounds	Organoheterocyclic compounds	Pyridines and derivatives		Pyridines and derivatives
A4a	WAUXWQPEINJXKO-UHFFFAOYSA-N	WAUXWQPEINJXKO-UHFFFAOYSA-N	Completed	Organic compounds	Benzenoids	Benzene and substituted derivatives	Benzoic acids and derivatives	Benzoic acid esters
A4b	FCHBXSIKZJZIQR-UHFFFAOYSA-N	FCHBXSIKZJZIQR-UHFFFAOYSA-N	Completed	Organic compounds	Benzenoids	Benzene and substituted derivatives	Benzoic acids and derivatives	Benzoic acid esters
A4c	FIIJMXMRJKMXEQ-UHFFFAOYSA-N	FIIJMXMRJKMXEQ-UHFFFAOYSA-N	Completed	Organic compounds	Benzenoids	Benzene and substituted derivatives	Benzoic acids and derivatives	Benzoic acid esters
A5a	WAUXWQPEINJXKO-UHFFFAOYSA-N	WAUXWQPEINJXKO-UHFFFAOYSA-N	Completed	Organic compounds	Benzenoids	Benzene and substituted derivatives	Benzoic acids and derivatives	Benzoic acid esters
A5b	FCHBXSIKZJZIQR-UHFFFAOYSA-N	FCHBXSIKZJZIQR-UHFFFAOYSA-N	Completed	Organic compounds	Benzenoids	Benzene and substituted derivatives	Benzoic acids and derivatives	Benzoic acid esters
A6a	WAUXWQPEINJXKO-UHFFFAOYSA-N	WAUXWQPEINJXKO-UHFFFAOYSA-N	Completed	Organic compounds	Benzenoids	Benzene and substituted derivatives	Benzoic acids and derivatives	Benzoic acid esters
A6b	FCHBXSIKZJZIQR-UHFFFAOYSA-N	FCHBXSIKZJZIQR-UHFFFAOYSA-N	Completed	Organic compounds	Benzenoids	Benzene and substituted derivatives	Benzoic acids and derivatives	Benzoic acid esters
B2a	NHOQXZDHPYQOAP-UHFFFAOYSA-N	NHOQXZDHPYQOAP-UHFFFAOYSA-N	Completed	Organic compounds	Benzenoids	Benzene and substituted derivatives	Benzoyl derivatives	1-benzoylpiperidines
B2b	IMNMSJIIHPKEMI-UHFFFAOYSA-N	IMNMSJIIHPKEMI-UHFFFAOYSA-N	Completed	Organic compounds	Benzenoids	Benzene and substituted derivatives	Benzoyl derivatives	1-benzoylpiperidines
B3a	OHMOGWLXGBNVKG-UHFFFAOYSA-N	OHMOGWLXGBNVKG-UHFFFAOYSA-N	Completed	Organic compounds	Benzenoids	Benzene and substituted derivatives	Anilides	Aromatic anilides	Furanilides	2-furanilides
B3b	VMRZBZCYPVARRE-UHFFFAOYSA-N	VMRZBZCYPVARRE-UHFFFAOYSA-N	Completed	Organic compounds	Benzenoids	Benzene and substituted derivatives	Anilides	Aromatic anilides	Furanilides	2-furanilides
B4a	UJAARAMTWUIWMX-UHFFFAOYSA-N	UJAARAMTWUIWMX-UHFFFAOYSA-N	Completed	Organic compounds	Benzenoids	Naphthalenes	Naphthalene sulfonic acids and derivatives	2-naphthalene sulfonic acids and derivatives
B4b	UJAARAMTWUIWMX-UHFFFAOYSA-N	UJAARAMTWUIWMX-UHFFFAOYSA-N	Completed	Organic compounds	Benzenoids	Naphthalenes	Naphthalene sulfonic acids and derivatives	2-naphthalene sulfonic acids and derivatives
C1a				Organic compounds	Benzenoids	Benzene and substituted derivatives	Benzoyl derivatives	1-benzoylpiperidines
C1b				Organic compounds	Benzenoids	Benzene and substituted derivatives	Benzoyl derivatives	1-benzoylpiperidines
C2a				Organic compounds	Benzenoids	Benzene and substituted derivatives	Benzoyl derivatives	1-benzoylpiperidines
C2b				Organic compounds	Benzenoids	Benzene and substituted derivatives	Benzoyl derivatives	1-benzoylpiperidines
C3a				Organic compounds	Benzenoids	Benzene and substituted derivatives	Benzoyl derivatives	1-benzoylpiperidines
C3b				Organic compounds	Benzenoids	Benzene and substituted derivatives	Benzoyl derivatives	1-benzoylpiperidines
C4a				Organic compounds	Benzenoids	Benzene and substituted derivatives	Benzoyl derivatives	1-benzoylpiperidines
C4b				Organic compounds	Benzenoids	Benzene and substituted derivatives	Benzoyl derivatives	1-benzoylpiperidines
C5a				Organic compounds	Benzenoids	Benzene and substituted derivatives	Benzoyl derivatives	1-benzoylpiperidines
C5b				Organic compounds	Benzenoids	Benzene and substituted derivatives	Benzoyl derivatives	1-benzoylpiperidines
CRG1a	IZXGMKHVTNJFAA-UHFFFAOYSA-N	IZXGMKHVTNJFAA-UHFFFAOYSA-N	Completed	Organic compounds	Benzenoids	Benzene and substituted derivatives	Anilides	Anilides
CRG1b	ZUKUBTGXSHTDHA-UHFFFAOYSA-N	ZUKUBTGXSHTDHA-UHFFFAOYSA-N	Completed	Organic compounds	Organic nitrogen compounds	Organonitrogen compounds	N-arylamides	N-arylamides
CRG1d	YMHDGRAROYGJLT-UHFFFAOYSA-N	YMHDGRAROYGJLT-UHFFFAOYSA-N	Completed	Organic compounds	Benzenoids	Benzene and substituted derivatives	Anilides	Anilides
CRG1g	YDKJSAXEBRKYLM-UHFFFAOYSA-N	YDKJSAXEBRKYLM-UHFFFAOYSA-N	Completed	Organic compounds	Benzenoids	Benzene and substituted derivatives	Anilides	Anilides
CRG2a	YPHQUSNPXDGUHL-UHFFFAOYSA-N	YPHQUSNPXDGUHL-UHFFFAOYSA-N	Completed	Organic compounds	Organic acids and derivatives	Carboxylic acids and derivatives	Acrylic acids and derivatives	Acrylic acids and derivatives
CRG2b	OHLHOLGYGRKZMU-UHFFFAOYSA-N	OHLHOLGYGRKZMU-UHFFFAOYSA-N	Completed	Organic compounds	Benzenoids	Benzene and substituted derivatives		Benzene and substituted derivatives
CRG2c	VTNHIBHLIBTEER-UHFFFAOYSA-N	VTNHIBHLIBTEER-UHFFFAOYSA-N	Completed	Organic compounds	Organoheterocyclic compounds	Pyrrolidines	N-acylpyrrolidines	N-acylpyrrolidines
CRG2d	SSDWQEONEAXDEB-UHFFFAOYSA-N	SSDWQEONEAXDEB-UHFFFAOYSA-N	Completed	Organic compounds	Organoheterocyclic compounds	Pyrrolidines	N-acylpyrrolidines	N-acylpyrrolidines
CRG3a	NFKDOZIFRBUOCG-UHFFFAOYSA-N	NFKDOZIFRBUOCG-UHFFFAOYSA-N	Completed	Organic compounds	Lipids and lipid-like molecules	Fatty Acyls	Fatty amides	N-acyl amines
CRG3b	BZSYYMAHNJHZCB-QHHAFSJGSA-N	BZSYYMAHNJHZCB-QHHAFSJGSA-N	Completed	Organic compounds	Benzenoids	Benzene and substituted derivatives	Anilides	Anilides
CRG3e	MREZLUJXFNFQIH-SNAWJCMRSA-N	MREZLUJXFNFQIH-SNAWJCMRSA-N	Completed	Organic compounds	Lipids and lipid-like molecules	Fatty Acyls	Fatty amides	N-acyl amines
CRG3f	MJHCBNPVMDFHJQ-UHFFFAOYSA-N	MJHCBNPVMDFHJQ-UHFFFAOYSA-N	Completed	Organic compounds	Organic acids and derivatives	Carboxylic acids and derivatives	Carboxylic acid derivatives	Carboxylic acid amides	Secondary carboxylic acid amides
CRG3g	XYLJOGVVSQGQIY-ONEGZZNKSA-N	XYLJOGVVSQGQIY-ONEGZZNKSA-N	Completed	Organic compounds	Lipids and lipid-like molecules	Fatty Acyls	Fatty amides	N-acyl amines
CRG3i	XFXHSJFUZPNEME-UHFFFAOYSA-N	XFXHSJFUZPNEME-UHFFFAOYSA-N	Completed	Organic compounds	Organoheterocyclic compounds	Piperidines	Piperidinones	Piperidinones
CRG4a	FHVAVBRLRHDKEL-ONEGZZNKSA-N	FHVAVBRLRHDKEL-ONEGZZNKSA-N	Completed	Organic compounds	Lipids and lipid-like molecules	Fatty Acyls	Fatty amides	N-acyl amines
CRG4b	XLETYQYYFYXDOR-ONEGZZNKSA-N	XLETYQYYFYXDOR-ONEGZZNKSA-N	Completed	Organic compounds	Organic acids and derivatives	Carboxylic acids and derivatives	Acrylic acids and derivatives	Acrylic acids and derivatives
MQOH	SMUQFGGVLNAIOZ-UHFFFAOYSA-N	SMUQFGGVLNAIOZ-UHFFFAOYSA-N	Completed	Organic compounds	Organoheterocyclic compounds	Quinolines and derivatives		Quinolines and derivatives

## Sheet: Literature CCS Comparison
Compound	MobCal-MPI CCS	Literature CCS	abs % deviation	References	Mean absolute Percent Error
5-Cl-MQOH	138.66				2.59345
5-CN-MQOH	132.21
5-F-MQOH	127.47
5-Me-MQOH	129.45
5-NO2-MQOH	137.66
5-OMe-MQOH	131.334
6-amino-2-MQ	126.43
6-Cl-MQOH	139.83
6-CN-MQOH	132.72
6-F-MQOH	129.26
6-Me-MQOH	129.62
6-methoxy-2-MQ	128.595
6-methyl-2-MQ	126.14
6-nitro-2-MQ	138.15
6-NO2-MQOH	139.37
6-OMe-MQOH	132.904
7-aminoclonazepam	162.906	163	0.0575527	CCSBASE Predicted (DSSTox)
7-chloro-2-MQ	129.57
7-Cl-MQOH	136.88
7-CN-MQOH	130.92
7-F-MQOH	128.01
7-Me-MQOH	128.85
7-NO2-MQOH	135.95
7-OMe-MQOH	131.9
8-amino-2-MQ	124.07
8-chloro-2-MQ	127.88
8-methoxy-2-MQ	128.2
8-methyl-2-MQ	127.66
8-nitro-2-MQ	130.62
A1a	160.242
A1b	158.213
A2a	163.229
A2b	166.649
A3a	155.42
A3b	162.114
A4a	175.745
A4b	178.953
A4c	178.693
A5a	177.505
A5b	180.885
A6a	175.361
A6b	178.656
B2a	163.174
B2b	169.025
B3a	171.452
B3b	184.489
B4a	191.673
B4b	183.765
C1a	189.092
C1b	184.983
C2a	170.039
C2b	172.786
C3a	206.318
C3b	201.176
C4a	196.354
C4b	198.585
C5a	215.773
C5b	216.657
CRG1a	129.081
CRG1b	123.988
CRG1d	135.22
CRG1g	133.977
CRG2a	110.757
CRG2b	131.796
CRG2c	121.788
CRG2d	121.903
CRG3a	111.852
CRG3b	131.539
CRG3e	116.18
CRG3f	118.2
CRG3g	113.244
CRG3i	115.564
CRG4a	122.232
CRG4b	116.071
MQOH	125.75
3-Hydroxycarbofuran	147.55	151.2	2.41402	CCSBASE Predicted (DSSTox)
Acibenzolar-S-methyl	134.84	138	2.28986	CCSBASE Predicted (DSSTox)
Aldicarb sulfone	140
Ametryn	151.92	150	1.28	CCSBASE Predicted (DSSTox)
Aminocarb	148.55	146.3	1.53794	CCSBASE Predicted (DSSTox)
Amitraz	177.58	172.8	2.7662	CCSBASE Predicted (DSSTox)
Azoxystrobin	203.238	195.75	3.82538	https://pubs.acs.org/doi/abs/10.1021/acs.analchem.7b00741
Benalaxyl	170.293	177.3	3.95187	CCSBASE Predicted (DSSTox)
Benzoximate	183.708	181	1.49612	CCSBASE Predicted (DSSTox)
Bifenazate	175.7	171.5	2.44898	CCSBASE Predicted (DSSTox)
Bitertanol	191.72	180.9	5.98121	CCSBASE Predicted (DSSTox)
Boscalid	175.16	171.67	2.03297	https://pubs.acs.org/doi/abs/10.1021/acs.analchem.7b00741
Bupirimate	178.73	173.5	3.01441	CCSBASE Predicted (DSSTox)
Buprofezin	172.88	173.58	0.403272	https://pubs.acs.org/doi/abs/10.1021/acs.analchem.7b00741
Butafenacil	205.65	208.59	1.40946	https://pubs.acs.org/doi/abs/10.1021/acs.analchem.7b00741
Butoxycarboxim	141.54	147.9	4.3002	CCSBASE Predicted (DSSTox)
Carbendazim	135.72	138.9	2.28942	CCSBASE Predicted (DSSTox)
Carbetamide	155.76	154.9	0.555197	CCSBASE Predicted (DSSTox)
Carbofuran	142.47	148	3.73649	CCSBASE Predicted (DSSTox)
Carboxin	145.35	150	3.1	CCSBASE Predicted (DSSTox)
Carfentrazone-ethyl	177.99	190.2	6.41956	CCSBASE Predicted (DSSTox)
Chlorfluazuron	221.18	202.9	9.00936	CCSBASE Predicted (DSSTox)
Chloroxuron	174.19	165.3	5.3781	CCSBASE Predicted (DSSTox)
Chlortoluron	144.78	145.3	0.35788	CCSBASE Predicted (DSSTox)
Clethodim	193.51	184.6	4.82665	CCSBASE Predicted (DSSTox)
Clofentezine	157.81	165.2	4.47337	CCSBASE Predicted (DSSTox)
Clothianidin	151.57	147	3.10884	CCSBASE Predicted (DSSTox)
Cyazofamid	166.91	176.4	5.37982	CCSBASE Predicted (DSSTox)
Cycluron	143.91	146.5	1.76792	CCSBASE Predicted (DSSTox)
Cyproconazole	166.83	173.2	3.67783	CCSBASE Predicted (DSSTox)
Cyprodinil	151.36	153.1	1.13651	CCSBASE Predicted (DSSTox)
Desmedipham	170.25	170.4	0.0880282	CCSBASE Predicted (DSSTox)
Diclobutrazol	170.68	176.2	3.1328	CCSBASE Predicted (DSSTox)
Dicrotophos	149.58	148.3	0.863115	CCSBASE Predicted (DSSTox)
Diethofencarb	169.28	162.1	4.42936	CCSBASE Predicted (DSSTox)
Difenoconazole	201.15	188.5	6.71088	CCSBASE Predicted (DSSTox)
Diflubenzuron	160.64	165.1	2.70139	CCSBASE Predicted (DSSTox)
Dimethoate	140.98	145.2	2.90634	CCSBASE Predicted (DSSTox)
Dimethomorph	193.58	190.2	1.77708	CCSBASE Predicted (DSSTox)
Dimoxystrobin	179.21	178.4	0.454036	CCSBASE Predicted (DSSTox)
Diniconazole	171.73	176	2.42614	CCSBASE Predicted (DSSTox)
Dioxacarb	141.93	148	4.10135	CCSBASE Predicted (DSSTox)
Diuron	146.54	152.3	3.78201	MCCLEAN DATABASE
Epoxiconazole	175.2	183.5	4.52316	CCSBASE Predicted (DSSTox)
Etaconazole	171.72	170.5	0.715543	CCSBASE Predicted (DSSTox)
Ethiprole	180.91	174.4	3.7328	CCSBASE Predicted (DSSTox)
Ethirimol	149.92	149.1	0.549966	CCSBASE Predicted (DSSTox)
Ethofumesate	169.63	162.7	4.25937	CCSBASE Predicted (DSSTox)
Etoxazole	185.73	193.5	4.0155	CCSBASE Predicted (DSSTox)
Famoxadon	196.73	186.7	5.37225	CCSBASE Predicted (DSSTox)
Fenamidone	171.35	171	0.204678	CCSBASE Predicted (DSSTox)
Fenarimol	174.42	173.7	0.414508	CCSBASE Predicted (DSSTox)
Fenazaquin	165.29	175.9	6.03184	CCSBASE Predicted (DSSTox)
Fenbuconazole	178.78	182.3	1.93088	CCSBASE Predicted (DSSTox)
Fenhexamid	160.33	163.3	1.81874	CCSBASE Predicted (DSSTox)
Fenobucarb	145.57	148	1.64189	CCSBASE Predicted (DSSTox)
Fenoxycarb	179.4	171.9	4.363	CCSBASE Predicted (DSSTox)
Fenpropimorph	176	177.5	0.84507	CCSBASE Predicted (DSSTox)
Fenpyroximate	200.82	202.3	0.731587	CCSBASE Predicted (DSSTox)
Fenuron	131.6	135.6	2.94985	CCSBASE Predicted (DSSTox)
Fipronil	179.44	180.7	0.697288	CCSBASE Predicted (DSSTox)
Flonicamid	146.74	141.2	3.92351	CCSBASE Predicted (DSSTox)
Flufenacet	173.62	178.2	2.57015	CCSBASE Predicted (DSSTox)
Flufenoxuron	207.59	204.46	1.53086	https://pubs.acs.org/doi/abs/10.1021/acs.analchem.7b00741
Fluoxastrobin	212.64	204.8	3.82812	CCSBASE Predicted (DSSTox)
Fluquinconazole	173.6	182.2	4.72009	CCSBASE Predicted (DSSTox)
Flusilazole	172.74	173.2	0.265589	CCSBASE Predicted (DSSTox)
Flutolanil	169.04	175.45	3.65346	https://pubs.acs.org/doi/abs/10.1021/acs.analchem.7b00741
Flutriafol	165.52	163.97	0.945295	https://pubs.acs.org/doi/abs/10.1021/acs.analchem.7b00742
Forchlorfenuron	153.43	153.4	0.0195567	CCSBASE Predicted (DSSTox)
Fuberidazole	132.88	135.1	1.64323	CCSBASE Predicted (DSSTox)
Furalaxyl	163.24	167.15	2.33922	https://pubs.acs.org/doi/abs/10.1021/acs.analchem.7b00742
Furathiocarb	192.59	190.73	0.975201	https://pubs.acs.org/doi/abs/10.1021/acs.analchem.7b00743
Hexaconazole	171.85	171.2	0.379673	https://pubs.acs.org/doi/abs/10.1021/acs.analchem.7b00744
Hexaflumuron	193.9	188.22	3.01775	https://pubs.acs.org/doi/abs/10.1021/acs.analchem.7b00745
Hexythiazox	180.03	183.83	2.06713	https://pubs.acs.org/doi/abs/10.1021/acs.analchem.7b00746
Hydramethylnon	235.73	200.3	17.6885	CCSBASE Predicted (DSSTox)
Imidacloprid	150.1	149.62	0.320813	https://pubs.acs.org/doi/abs/10.1021/acs.analchem.7b00741
Indoxacarb	210.52	207.03	1.68575	https://pubs.acs.org/doi/abs/10.1021/acs.analchem.7b00741
Ipconazole	167.66	179.3	6.49191	CCSBASE Predicted (DSSTox)
Iprovalicarb	184.97	179.7	2.93267	CCSBASE Predicted (DSSTox)
Isoprocarb	140.4	143.5	2.16028	CCSBASE Predicted (DSSTox)
Isoproturon	150.35	151.8	0.955204	https://pubs.rsc.org/en/content/articlelanding/2018/ay/c7ay02808c#!divAbstract
Kresoxim-methyl	175.13	172.6	1.46582	CCSBASE Predicted (DSSTox)
Linuron	148.44	152.6	2.72608	https://pubs.rsc.org/en/content/articlelanding/2018/ay/c7ay02808c#!divAbstract
Lufenuron	193.43	198.53	2.56888	https://pubs.acs.org/doi/abs/10.1021/acs.analchem.7b00741
Mandipropamid	196.28	195	0.65641	CCSBASE Predicted (DSSTox)
Mefenacet	166.42	164.6	1.10571	CCSBASE Predicted (DSSTox)
Mepanipyrim	150.85	155.3	2.86542	CCSBASE Predicted (DSSTox)
Mepronil	167.68	163.9	2.30628	CCSBASE Predicted (DSSTox)
Mesotrione	176.08	167.8	4.93445	CCSBASE Predicted (DSSTox)
Metaflumizone	213.05	201.4	5.78451	CCSBASE Predicted (DSSTox)
Metalaxyl	155.72	159.96	2.65066	https://pubs.acs.org/doi/abs/10.1021/acs.analchem.7b00741
Metconazole	172.14	168.62	2.08753	https://pubs.acs.org/doi/abs/10.1021/acs.analchem.7b00742
Methabenzthiazuron	139.7	142.47	1.94427	https://pubs.acs.org/doi/abs/10.1021/acs.analchem.7b00743
Methamidophos	116.66	123.2	5.30844	https://pubs.rsc.org/en/content/articlelanding/2018/ay/c7ay02808c#!divAbstract
Methiocarb	149.45	150.9	0.960901	CCSBASE Predicted (DSSTox)
Methoprotryne	159.68	161.4	1.06568	CCSBASE Predicted (DSSTox)
Methoxyfenozide	193.1	190.7	1.25852	CCSBASE Predicted (DSSTox)
Metribuzin	139.56	149.5	6.64883	MCCLEAN DATABASE
Mevinphos	136.59	144.3	5.34304	CCSBASE Predicted (DSSTox)
Mexacarbate	152.28	150.5	1.18272	CCSBASE Predicted (DSSTox)
Monocrotophos	139.4	146.6	4.91132	CCSBASE Predicted (DSSTox)
Monolinuron	142.02	142.9	0.615815	https://pubs.acs.org/doi/abs/10.1021/acs.analchem.7b00741
Myclobutanil	176.14	165.7	6.30054	CCSBASE Predicted (DSSTox)
Neburon	162.73	160.9	1.13735	CCSBASE Predicted (DSSTox)
Nitenpyram	157.38	160.32	1.83383	https://pubs.acs.org/doi/abs/10.1021/acs.analchem.7b00741
Novaluron	203.19	196.35	3.48358	https://pubs.acs.org/doi/abs/10.1021/acs.analchem.7b00742
Nuarimol	168.9	171.4	1.45858	CCSBASE Predicted (DSSTox)
Oxadixyl	155.64	160.8	3.20896	CCSBASE Predicted (DSSTox)
Penconazole	161.75	163.7	1.1912	CCSBASE Predicted (DSSTox)
Pencycuron	179.27	179.71	0.244839	https://pubs.acs.org/doi/abs/10.1021/acs.analchem.7b00742
Phenmedipham	170.59	169.8	0.465253	CCSBASE Predicted (DSSTox)
Picoxystrobin	175.01	177.5	1.40282	https://pubs.acs.org/doi/abs/10.1021/acs.analchem.7b00742
Pirimicarb	146.02	155.9	6.3374	https://pubs.rsc.org/en/content/articlelanding/2018/ay/c7ay02808c#!divAbstract
Prochloraz	180.02	161.68	11.3434	https://pubs.acs.org/doi/abs/10.1021/acs.analchem.7b00742
Promecarb	148.8	147.4	0.949796	CCSBASE Predicted (DSSTox)
Prometon	152.45	152.4	0.0328084	CCSBASE Predicted (DSSTox)
Prometryne	157.19	155.3	1.217	CCSBASE Predicted (DSSTox)
Propamocarb	143.16	144.9	1.20083	CCSBASE Predicted (DSSTox)
Propiconazole	180.29	174.7	3.19977	CCSBASE Predicted (DSSTox)
Propoxur	140.64	152.8	7.95812	https://pubs.rsc.org/en/content/articlelanding/2018/ay/c7ay02808c#!divAbstract
Prothioconazole	165.83	178.8	7.25391	CCSBASE Predicted (DSSTox)
Pymetrozine	149.28	150.71	0.948842	https://pubs.acs.org/doi/abs/10.1021/acs.analchem.7b00742
Pyracarbolid	144.13	149.3	3.46283	CCSBASE Predicted (DSSTox)
Pyraclostrobin	186.27	183.19	1.68131	https://pubs.acs.org/doi/abs/10.1021/acs.analchem.7b00741
Pyridaben	191.33	192.9	0.813893	CCSBASE Predicted (DSSTox)
Pyrimethanil	142.27	143.2	0.649441	https://pubs.rsc.org/en/content/articlelanding/2018/ay/c7ay02808c#!divAbstract
Pyriproxyfen	186.24	177.3	5.0423	CCSBASE Predicted (DSSTox)
Quinoxyfen	160.78	164	1.96341	CCSBASE Predicted (DSSTox)
Rotenone	197.34	198.4	0.534274	MCCLEAN DATABASE
Secbumeton	153.44	152.4	0.682415	CCSBASE Predicted (DSSTox)
Simetryn	144.87	145.5	0.43299	CCSBASE Predicted (DSSTox)
Spirodiclofen	190.31	192.4	1.08628	CCSBASE Predicted (DSSTox)
Spirotetramat	193.47	189.98	1.83704	https://pubs.acs.org/doi/abs/10.1021/acs.analchem.7b00741
Spiroxamine	178.24	172.3	3.44748	CCSBASE Predicted (DSSTox)
Sulfentrazone	172.57	173.63	0.610494	https://pubs.acs.org/doi/abs/10.1021/acs.analchem.7b00741
Tebuconazole	160.62	167.37	4.03298	https://pubs.acs.org/doi/abs/10.1021/acs.analchem.7b00741
Tebufenpyrad	183.25	191.25	4.18301	https://pubs.acs.org/doi/abs/10.1021/acs.analchem.7b00742
Tebuthiuron	142.99	151.6	5.67942	CCSBASE Predicted (DSSTox)
Teflubenzuron	169.28	171.81	1.47256	https://pubs.acs.org/doi/abs/10.1021/acs.analchem.7b00742
Temephos	216.23	187.7	15.1998	CCSBASE Predicted (DSSTox)
Terbumeton	150	152.6	1.7038	CCSBASE Predicted (DSSTox)
Terbutryne	154.61	160.2	3.48939	MCCLEAN DATABASE
Tetraconazole	170.4	174.34	2.25995	https://pubs.acs.org/doi/abs/10.1021/acs.analchem.7b00742
Thiabendazole	135.57	144.1	5.9195	MCCLEAN DATABASE
Thiacloprid	158.92	154.84	2.63498	https://pubs.acs.org/doi/abs/10.1021/acs.analchem.7b00742
Thiamethoxam	157.1	155.9	0.769724	CCSBASE Predicted (DSSTox)
Thidiazuron	147.29	144.1	2.21374	CCSBASE Predicted (DSSTox)
Thiobencarb	155.12	156.3	0.754958	CCSBASE Predicted (DSSTox)
Thiophanate-methyl	173	174.24	0.711662	https://pubs.acs.org/doi/abs/10.1021/acs.analchem.7b00742
Triadimefon	172.41	165.2	4.36441	CCSBASE Predicted (DSSTox)
Triadimenol	171.43	166.3	3.08479	CCSBASE Predicted (DSSTox)
Tricyclazole	130.04	134.2	3.09985	CCSBASE Predicted (DSSTox)
Trifloxystrobin	190.48	195.4	2.51791	CCSBASE Predicted (DSSTox)
Triflumizole	173.15	178.3	2.88839	CCSBASE Predicted (DSSTox)
Triflumuron	165.83	169.88	2.38404	https://pubs.acs.org/doi/abs/10.1021/acs.analchem.7b00742
Triticonazole	175.74	179.18	1.91986	https://pubs.acs.org/doi/abs/10.1021/acs.analchem.7b00743
Zoxamide	167.43	176.2	4.9773	CCSBASE Predicted (DSSTox)
2,3-Methylenedioxyamphetamine	138.563	137.7	0.626832	CCSBASE Predicted (DSSTox)
(+)-Methadone	176.858	177.7	0.473836	https://www.sciencedirect.com/science/article/abs/pii/S0021967318301894
(+-)-Propanolol	162.498	161.4	0.680287	CCSBASE Predicted (DSSTox)
4-Fluoroamphetamine	132.271	131.9	0.281271	CCSBASE Predicted (DSSTox)
4-Hydroxynirvanol	147.842	149.5	1.10909	CCSBASE Predicted (DSSTox)
Acebutolol	190	190.2	0.105155	https://www.sciencedirect.com/science/article/abs/pii/S0021967318301894
Acetaminophen	130.246	131.4	0.878455	MCCLEAN DATABASE
Acetamiprid	153.995	150.24	2.49918	https://pubs.acs.org/doi/10.1021/acs.analchem.7b00741
Acyclovir	143.992	146.5	1.7122	https://pubs.acs.org/doi/abs/10.1021/acs.analchem.7b01709
Adenine	121.373	122.4	0.838775	https://pubs.acs.org/doi/10.1021/acs.analchem.7b01709
Alanine	118.355	115.6	2.38335	CCSBASE Predicted (DSSTox)
Alprazolam	170.398	171.5	0.642482	https://doi.org/10.1016/j.chroma.2018.02.025
Amitriptyline	162.314	167.2	2.92201	https://doi.org/10.1016/j.chroma.2018.02.025
Amphetamine	130.004	129.3	0.544248	CCSBASE Predicted
Aspartic Acid	124.968	122	2.43259	https://doi.org/10.1021/ac500405x
Atenolol	154.373	159	2.90985	https://pubs.acs.org/doi/abs/10.1021/acs.analchem.7b01709
Benzoylecgonine	165.177	167.3	1.2692	https://www.sciencedirect.com/science/article/abs/pii/S0021967318301894
Betaine	116.317	121.1	3.94923	MCCLEAN DATABASE
Bufuralol	159.47	161.3	1.1345	CCSBASE Predicted (DSSTox)
Buprenorphine	204.949	208.6	1.75009	https://pubs.rsc.org/en/content/articlelanding/2019/AN/C9AN00873J#!divAbstract
Buscopan	191.991
Buspirone	188.315	199.3	5.51197	https://www.sciencedirect.com/science/article/abs/pii/S0021967318301894
Caffeine	134.19	140.2	4.28669	MCCLEAN DATABASE
Carbamazepine	149.21	150	0.526667	https://pubs.rsc.org/en/content/articlelanding/2018/ay/c7ay02808c#!divAbstract
Carisoprodol	163.046	149.1	9.3533	https://pubs.acs.org/doi/abs/10.1021/acs.analchem.7b01709
Chloramphenicol	168.259	163.9	2.6597	https://pubs.acs.org/doi/10.1021/acs.analchem.7b01709
Chlordiazepoxide	167.81	170.4	1.51995	https://www.sciencedirect.com/science/article/abs/pii/S0021967318301894
Chlorpheniramine	162.957	164.4	0.877941	CCSBASE Predicted (DSSTox)
Chlorprothixene	168.47	169.8	0.783322	https://pubs.rsc.org/en/content/articlelanding/2018/ay/c7ay02808c#!divAbstract
Chlorthalidone	173.388	166.7	4.01226	https://pubs.acs.org/doi/10.1021/acs.analchem.7b01709
Choline	111.942	117.6	4.81164	https://doi.org/10.1021/acs.analchem.8b04322
Cimetidine	158.245	155.7	1.63479	https://pubs.acs.org/doi/abs/10.1021/acs.analchem.7b01709
Clenbuterol	159.377	159.2	0.111398	https://pubs.acs.org/doi/abs/10.1021/acs.analchem.7b00741
Clonazepam	171.42	171	0.245612	https://pubs.rsc.org/en/content/articlelanding/2018/ay/c7ay02808c#!divAbstract
Clonidine	142.413	144	1.10186	https://www.sciencedirect.com/science/article/abs/pii/S0021967318301894
Cocaine	170.712	169.5	0.715086	https://pubs.rsc.org/en/content/articlelanding/2018/ay/c7ay02808c#!divAbstract
Cotinine	140.479	141.1	0.440213	https://pubs.acs.org/doi/10.1021/acs.analchem.7b01709
Cyromazine	129.665	133.23	2.67556	https://doi.org/10.1021/acs.analchem.7b00741
Cytidine	149.2	151.1	1.25731	https://pubs.acs.org/doi/10.1021/acs.analchem.7b01709
Desalkylflurazepam	161.824	158.6	2.03297	CCSBASE Predicted (DSSTox)
Desipramine	157.261	163.1	3.58003	CCSBASE Predicted (DSSTox)
Desomorphine	156.42	161.6	3.20528	CCSBASE Predicted (DSSTox)
Desoxypipradrol	165.58	164.1	0.90181	https://www.sciencedirect.com/science/article/abs/pii/S0021967318301894
Diazepam	163.41	164.9	0.903825	https://pubs.rsc.org/en/content/articlelanding/2018/ay/c7ay02808c#!divAbstract
Dihydrocodeine	163.342	168.6	3.11891	https://www.sciencedirect.com/science/article/abs/pii/S0021967318301894
Dimetridazole	124.72	133.3	6.43661	https://www.sciencedirect.com/science/article/abs/pii/S0003267018311693
Diphenhydramine	162.08	161.7	0.235012	https://pubs.rsc.org/en/content/articlelanding/2018/ay/c7ay02808c#!divAbstract
D-Pantothenic acid	138.73	145	4.3244	https://link.springer.com/article/10.1007/s00216-015-8664-8
Ephedrine	133.425	138.2	3.45482	https://pubs.rsc.org/en/content/articlelanding/2018/ay/c7ay02808c#!divAbstract
Epitestosterone	162.18	170.7	4.99121	https://pubs.acs.org/doi/abs/10.1021/acs.analchem.7b01709
Ethylone	148.921	151.3	1.57228	https://pubs.rsc.org/en/content/articlelanding/2018/ay/c7ay02808c#!divAbstract
Fenoterol	168.186	180.4	6.7703	https://pubs.acs.org/doi/abs/10.1021/acs.analchem.7b00741
Fentanyl	186.769	184.1	1.44965	https://doi.org/10.1016/j.chroma.2018.02.025
Fluoxetine	177.32	176.5	0.46477	https://www.sciencedirect.com/science/article/abs/pii/S0021967318301894
Fluvoxamine	171.219	177	3.26598	https://www.sciencedirect.com/science/article/abs/pii/S0021967318301894
Gabapentin	133.287	138.6	3.83322	https://doi.org/10.1021/acs.analchem.7b01709
Guanine	129.71	131	0.984898	MCCLEAN DATABASE
Guanosine	157.903	163.5	3.42318	MCCLEAN DATABASE
Haloperidol	191.003	191.7	0.363565	https://pubs.acs.org/doi/abs/10.1021/acs.analchem.7b01709
Histamine	115.729	120.4	3.87985	MCCLEAN DATABASE
Hydrocodone	167.88	167.4	0.286738	https://www.sciencedirect.com/science/article/abs/pii/S0021967318301894
Imipramine	160.764	165.3	2.74388	https://pubs.rsc.org/en/content/articlelanding/2018/ay/c7ay02808c#!divAbstract
Indoprofen	167.184	166.6	0.350662	https://pubs.acs.org/doi/abs/10.1021/acs.analchem.7b01709
Ketamine	144.498	148.9	2.95637	https://pubs.rsc.org/en/content/articlelanding/2018/ay/c7ay02808c#!divAbstract
Ketoprofen	153.51	155.4	1.21616	https://pubs.acs.org/doi/abs/10.1021/acs.analchem.7b00741
Ketorolac	156.815	156.3	0.329355	CCSBASE Predicted (DSSTox)
Lacosamide	157.954	158.8	0.532954	CCSBASE Predicted (DSSTox)
Lamotrigine	152.68	151.2	0.978836	https://www.sciencedirect.com/science/article/abs/pii/S0021967318301894
L-arginine	129.146	136.3	5.24881	MCCLEAN DATABASE
L-asparagine	125.085	130.7	4.29611	MCCLEAN DATABASE
L-glutamic acid	127.372	130.9	2.69518	MCCLEAN DATABASE
L-Glycine	116.615	110.5	5.53423	CCSBASE Predicted (DSSTox)
L-histidine	127.682	131.9	3.19757	MCCLEAN DATABASE
Lidocaine	156.815	157.7	0.561224	https://www.sciencedirect.com/science/article/abs/pii/S0021967318301894
L-Isoleucine	128.156	134.3	4.57464	MCCLEAN DATABASE
L-leucine	129.822	134.7	3.62104	MCCLEAN DATABASE
L-lysine	123.446	131.1	5.83807	MCCLEAN DATABASE
L-methionine	127.278	132.9	4.2301	MCCLEAN DATABASE
Lovastatin	186.933	198.3	5.73215	CCSBASE Predicted (DSSTox)
L-phenylalanine	136.059	140.1	2.88432	MCCLEAN DATABASE
L-proline	120.112	125.4	4.21652	MCCLEAN DATABASE
L-serine	120.17	125.6	4.32325	CCSBASE Predicted (DSSTox)
L-threonine	122.417	120.066	1.9577	MCCLEAN DATABASE
L-Tyrosine	140.753	145.5	3.26273	MCCLEAN DATABASE
L-Valine	123.606	120.8	2.323	MCCLEAN DATABASE
Malic Acid	120.224	124.8	3.66704	CCSBASE Predicted
Maprotiline	160.505	164.2	2.2503	https://www.sciencedirect.com/science/article/abs/pii/S0021967318301894
Melamine	119.54	121.2	1.36964	CCSBASE Predicted (DSSTox)
Melatonin	148.862	153.5	3.02177	MCCLEAN DATABASE
Meprobamate	143.162	148.7	3.72445	CCSBASE Predicted (DSSTox)
Methamphetamine	133.161	133.5	0.253755	https://pubs.rsc.org/en/content/articlelanding/2018/ay/c7ay02808c#!divAbstract
Methylhistamine	120.668	121.8	0.92946	MCCLEAN DATABASE
Metoprolol	162.599	170.7	4.7456	https://pubs.acs.org/doi/abs/10.1021/acs.analchem.7b01709
monoxidil	143.03	145.9	1.9671	CCSBASE Predicted (DSSTox)
Monuron	140.87	141.3	0.304269	CCSBASE Predicted (DSSTox)
Morphine	160.195	164	2.32017	https://pubs.rsc.org/en/content/articlelanding/2018/ay/c7ay02808c#!divAbstract
Naproxen	150.859	153.9	1.97612	MCCLEAN DATABASE
Niacinamide (Nicotinamide)	123.233	121.7	1.25975	https://pubs.acs.org/doi/abs/10.1021/acs.analchem.7b01709
Nicotinic acid (Niacin)	120.355	115	4.65613	https://doi.org/10.1021/ac500405x
Nifenazone	170.72	172.5	1.03188	https://pubs.acs.org/doi/abs/10.1021/acs.analchem.7b01709
Nitrazepam	166.22	166.3	0.0481058	https://pubs.rsc.org/en/content/articlelanding/2018/ay/c7ay02808c#!divAbstract
N-methylephedrine	134.989
Norepinephrine	136.035	132.6	2.59018	https://pubs.acs.org/doi/10.1021/acs.analchem.7b01709
Norfentanyl	151.22	156.7	3.49711	CCSBASE Predicted (DSSTox)
Normeperidine	154.126	157.3	2.01764	CCSBASE Predicted (DSSTox)
Nortriptyline	164.099	163.1	0.612202	https://pubs.acs.org/doi/abs/10.1021/acs.analchem.7b01709
O-Desmethyl-cis-tramadol HCL	151.786
Oxazepam	160.745	162.3	0.958102	https://www.sciencedirect.com/science/article/abs/pii/S0021967318301894
Oxymorphone	161.06	164.6	2.15067	https://www.sciencedirect.com/science/article/abs/pii/S0021967318301894
Pamaquine	173.782	179.3	3.07767	CCSBASE Predicted (DSSTox)
Pentedrone	146.675	145.7	0.669228	https://www.sciencedirect.com/science/article/abs/pii/S0021967318301894
Perphenazine	192	192	0.000242097	https://pubs.acs.org/doi/abs/10.1021/acs.analchem.7b01709
Phenacetin	140.431	140.5	0.0491375	https://pubs.acs.org/doi/abs/10.1021/acs.analchem.7b01709
Pheniramine	154.61	158.3	2.33087	CCSBASE Predicted (DSSTox)
phenyltoloxamine	153.692	161.6	4.89345	CCSBASE Predicted (DSSTox)
Progesterone	172.018	185.5	7.26809	MCCLEAN DATABASE
Propafenone	175.049	178.5	1.9331	https://www.sciencedirect.com/science/article/abs/pii/S0021967318301894
Protriptyline	159.234	162.8	2.19024	https://www.sciencedirect.com/science/article/abs/pii/S0021967318301894
Pseudoephedrine	134.852	137.3	1.78326	CCSBASE Predicted (DSSTox)
Pyridoxal	127.488	131.3	2.90293	MCCLEAN DATABASE
Quinidine	174.714	175.8	0.617747	https://www.sciencedirect.com/science/article/abs/pii/S0021967318301894
R-(-)-Nirvanol	144.497	146.2	1.16493	CCSBASE Predicted (DSSTox)
Ractopamine	166.206	168.9	1.59493	https://pubs.acs.org/doi/abs/10.1021/acs.analchem.7b00741
ranitidine	166.677	167	0.193618	https://pubs.acs.org/doi/abs/10.1021/acs.analchem.7b01709
Retigabine	178.026	170.5	4.41398	CCSBASE Predicted (DSSTox)
Ritalinic Acid	146.505	150	2.32987	https://www.sciencedirect.com/science/article/abs/pii/S0021967318301894
S-(+)-Ibuprofen	150.609	144	4.58965	https://pubs.acs.org/doi/abs/10.1021/acs.analchem.7b01709
Salbutamol	152.358	158.1	3.63164	https://pubs.rsc.org/en/content/articlelanding/2018/ay/c7ay02808c#!divAbstract
Salicylic Acid	120.555	125	3.55617	CCSBASE Predicted (DSSTox)
Sarcosine	116.507	115	1.31072	CCSBASE Predicted (DrugBank)
Selegiline	139.807	141	0.845773	https://pubs.acs.org/doi/abs/10.1021/acs.analchem.7b01709
Sulfadiazine	153.355	153.9	0.354077	https://www.sciencedirect.com/science/article/abs/pii/S0003267018311693
Sulfamerazine	156.288	156.3	0.00763094	https://pubs.acs.org/doi/abs/10.1021/acs.analchem.7b01709
Sulfamethazine (Sulfadimidine)	159.811	163.8	2.43529	MCCLEAN DATABASE
Sulpiride	185.449	184.9	0.297064	https://pubs.rsc.org/en/content/articlelanding/2018/ay/c7ay02808c#!divAbstract
Tapentadol	148.117	152.1	2.61874	https://www.sciencedirect.com/science/article/abs/pii/S0021967318301894
Temazepam	164.255	166.1	1.11078	https://www.sciencedirect.com/science/article/abs/pii/S0021967318301894
Terbutaline	151.344	154.9	2.29538	https://www.sciencedirect.com/science/article/abs/pii/S0021967318301894
Testosterone	163.83	170.6	3.96835	https://pubs.acs.org/doi/abs/10.1021/acs.analchem.7b01709
Thymine	118.313	122.1	3.1016	MCCLEAN DATABASE
Tolbutamide	164.914	163	1.17395	https://www.sciencedirect.com/science/article/abs/pii/S0021967318301894
Tramadol	158.29	161.4	1.92689	https://www.sciencedirect.com/science/article/abs/pii/S0021967318301894
Trimethoprim	170.803	170.8	0.00185585	https://www.sciencedirect.com/science/article/abs/pii/S0021967318301894
Trimipramine	166.376	171.2	2.81776	https://www.sciencedirect.com/science/article/abs/pii/S0021967318301894
Uracil	115.172	126.2	8.73866	MCCLEAN DATABASE
Uridine	147.414	161.1	8.49526	MCCLEAN DATABASE
Vamidothion	156.35	158.9	1.60478	CCSBASE Predicted (DSSTox)
Venlafaxein	168.461	169.9	0.847261	https://pubs.acs.org/doi/10.1021/acs.analchem.7b01709
Verapamil	217.97	210	3.79521	https://pubs.acs.org/doi/10.1021/ac202625t
Vigabatrin	124.141	128.1	3.09073	CCSBASE Predicted (DSSTox)
Warfarin	168.89	166.8	1.25302	https://www.sciencedirect.com/science/article/abs/pii/S0021967318301894
Xanthine	129.641	132.9	2.45196	MCCLEAN DATABASE
Zolpidem	176.165	177.2	0.584074	https://www.sciencedirect.com/science/article/abs/pii/S0021967318301894
4-Aminobutyric acid (GABA)	118.267	119.3	0.865854	CCSBASE Predicted (DSSTox)
(+)-Propoxyphene	182.509	179.1	1.90338	https://pubs.rsc.org/en/content/articlelanding/2019/AN/C9AN00873J#!divAbstract
Bendroflumethiazide	187.582	188.6	0.539957	https://pubs.acs.org/doi/abs/10.1021/acs.analchem.7b01709
Etodolac	168.834	164.4	2.69697	https://pubs.acs.org/doi/abs/10.1021/acs.analchem.7b01709
Ketoconazole	211.659	216.1	2.05484	https://pubs.rsc.org/en/content/articlelanding/2018/ay/c7ay02808c#!divAbstract
L-glutamine	126.959	130.9	3.01052	MCCLEAN DATABASE
Loperamide	221.8	222.7	0.404191	https://www.sciencedirect.com/science/article/abs/pii/S0021967318301894
L-tryptophan	145.459	154.22	5.68065	https://pubs.rsc.org/en/content/articlelanding/2017/sc/c7sc03464d#!divAbstract
Midazolam	172.965	172.8	0.0952937	https://www.sciencedirect.com/science/article/abs/pii/S0021967318301894
Naloxone	169.919	173	1.7807	https://pubs.rsc.org/en/content/articlelanding/2018/ay/c7ay02808c#!divAbstract
Norbuprenorphine	193.216	198.2	2.51474	CCSBASE Predicted (DSSTox)
Norcodeine	166.203	166.1	0.06187	https://www.sciencedirect.com/science/article/abs/pii/S0021967318301894
Noroxycodone HCL	163.46	168.9	3.2207	CCSBASE Predicted (DSSTox)
Norsertraline HCL	162.643	163.6	0.584804	CCSBASE Predicted (DSSTox)
Prazosin	197.627	192.7	2.55686	https://www.sciencedirect.com/science/article/abs/pii/S0021967318301894
Prednisolone	177.841	183.7	3.18935	https://pubs.acs.org/doi/abs/10.1021/acs.analchem.7b01709
Safranin O	176.272	174.2	1.18944	CCSBASE Predicted (DSSTox)
Sotalol	162.811	167	2.50847	https://www.sciencedirect.com/science/article/abs/pii/S0021967318301894
Tamoxifen	200.251	197.1	1.59889	https://www.sciencedirect.com/science/article/abs/pii/S0021967318301894
Taurocholic Acid	195.216	207.6	5.96545	https://pubs.acs.org/doi/10.1021/jasms.0c00015
Terfenadine	231.073	227	1.7941	MCCLEAN DATABASE
Urapidil	184.834	194.6	5.01828	CCSBASE Predicted (DSSTox)
